# Supplementary material for: Synthesis and biological evaluation of benzo[a]phenazine derivatives as a dual inhibitor of topoisomerase I and II
Source: Royal Society of Chemistry journal article supplement (doi:10.1039/c3ob40325d), 2013-01-01
Supplement: c3ob40325d.pdf [file c3ob40325d.pdf]

## Supporting Information

### Synthesis and Biological Evaluation of Benzo[*a*]phenazin-5(7*H*)-one Derivatives as a Dual Inhibitor of Topoisomerase I and II

*Shi-Tian Zhuo, Chun-Yan Li, Ming-Hao Hu, Shi-Liang Huang,\* Tian-Miao Ou, Jia-Heng Tan, Lin-Kun An, Ding Li, Lian-Quan Gu, Zhi-Shu Huang\**

School of Pharmaceutical Sciences, Sun Yat-sen University, Guangzhou University City, Waihuan East Road 132, Guangzhou 510006, People's Republic of China.

\* To whom correspondence should be addressed. Phone: 8620-39943052 (S.-L. Huang);  
8620-39943056 (Z.-S. Huang). Fax: 8620-39943056 (S.-L. Huang and Z.-S. Huang). E-mail:  
[lsshsl@mail.sysu.edu.cn](mailto:lsshsl@mail.sysu.edu.cn) (S.-L. Huang); [ceshzs@mail.sysu.edu.cn](mailto:ceshzs@mail.sysu.edu.cn) (Z.-S. Huang);

#### Table of Contents

| Figures       | Contents                                                                                                                                          | Pages  |
|---------------|---------------------------------------------------------------------------------------------------------------------------------------------------|--------|
| Figure S1     | Quantitates the effects of <b>5a-1</b> on DNA relaxation catalyzed by Topo I and Topo II respectively.                                            | S2     |
| Figure S2     | Effects of <b>5d-2</b> on topoisomerase I-DNA cleavage complexes formation at various concentrations.                                             | S3     |
| Figure S3     | Quantitates the effects of <b>5d-2</b> on DNA relaxation catalyzed by Topo II at 2 mM and 4 mM ATP respectively.                                  | S3     |
| Figure S4     | Identification of HsATPase.                                                                                                                       | S4     |
| Figure S5     | The double reciprocal Lineweaver-Burk plot for ATP-hydrolysis activity of ATPase in the absence of DNA                                            | S4     |
| Figure S6-S26 | <sup>1</sup> H NMR, <sup>13</sup> C NMR, HRMS and HPLC spectra of compounds <b>5a-1~6</b> , <b>6a-1~6</b> , <b>5b-1~5e-1</b> , <b>5b-2~5e-2</b> . | S5-S46 |

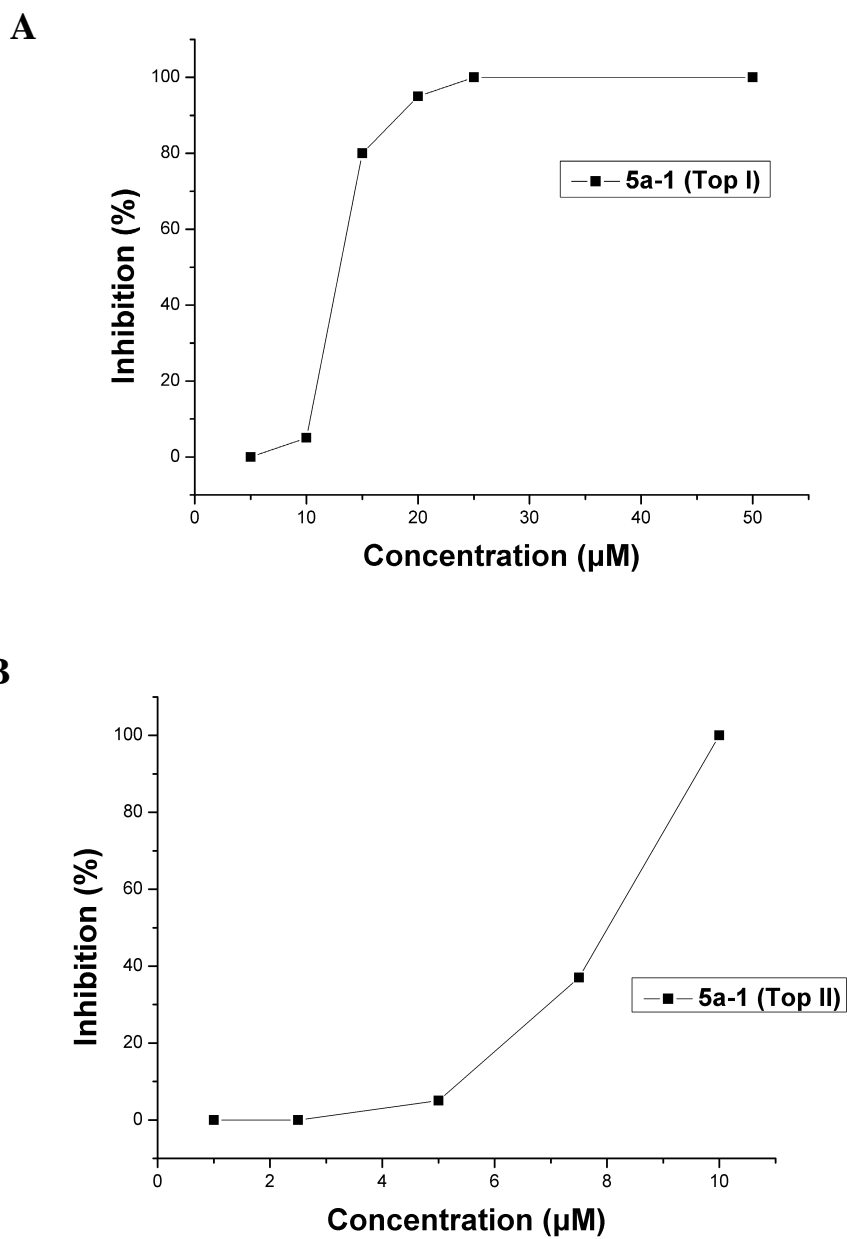

**Fig. S1** A and B, Quantitates the effects of **5a-1** on DNA relaxation catalyzed by Topo I and Topo II respectively. The fit data gave  $IC_{50}$  values of 12.5  $\mu\text{M}$  and 8.2  $\mu\text{M}$  for Topo I inhibition and Topo II inhibition respectively.

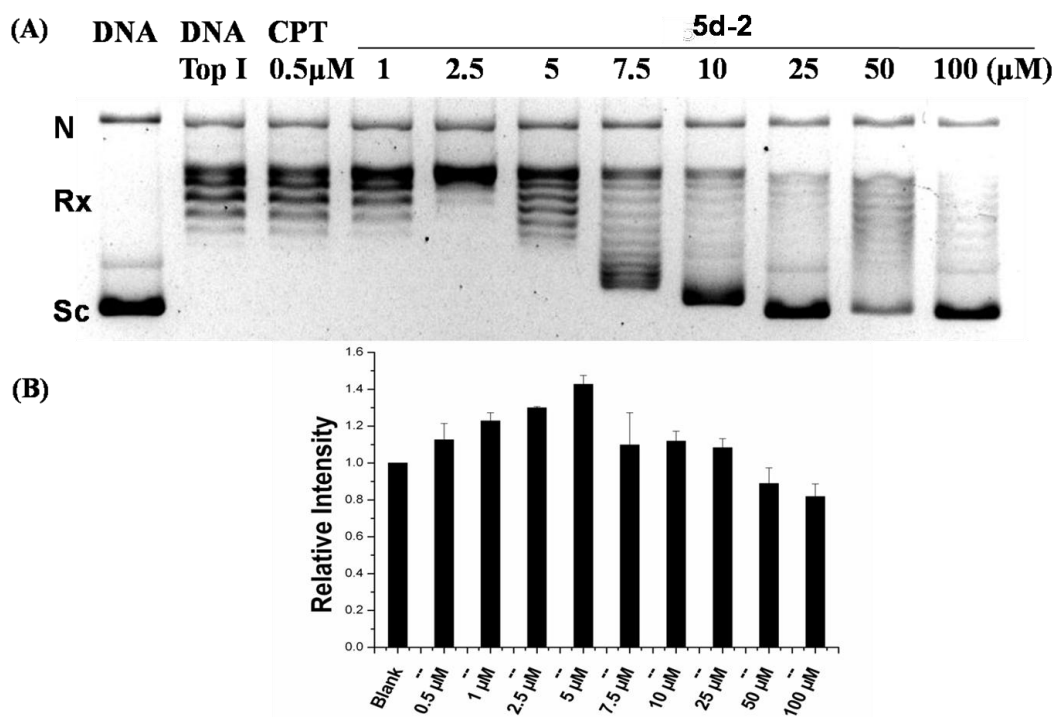

**Fig. S2** Effects of **5d-2** on topoisomerase I-DNA cleavage complexes formation at various concentrations.

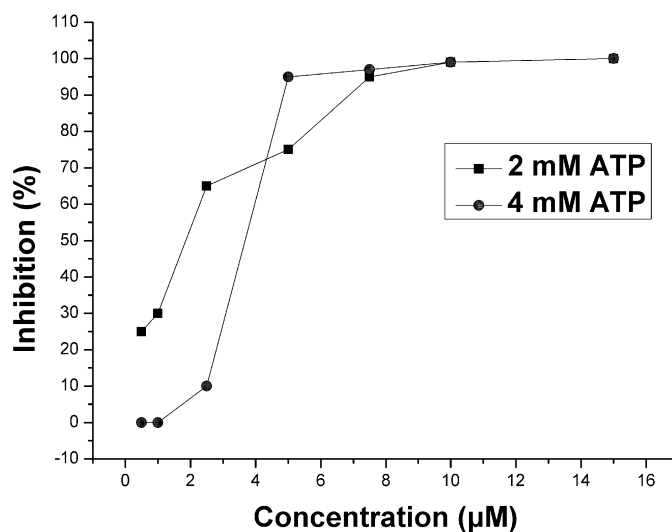

**Figure S3.** Quantitates the effects of **5d-2** on DNA relaxation catalyzed by Topo II at 2 mM and 4 mM ATP respectively. The fit data gave  $IC_{50}$  values of 2.0  $\mu$ M and 3.3  $\mu$ M for reaction containing 2 mM and 4 mM ATP respectively.

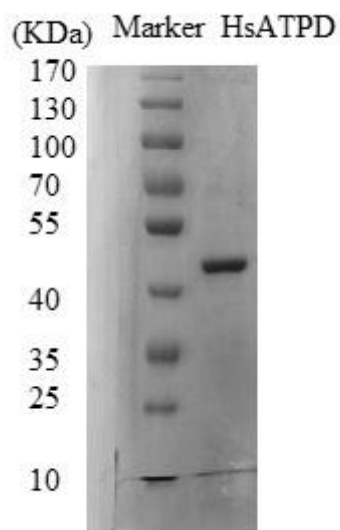

**Fig. S4** Identification of HsATPase. 2  $\mu\text{g}$  each of molecular size markers and purified HsATPase were run in a 10% SDS-polyacrylamide gel electrophoresis and stained with Coomassie brilliant blue.

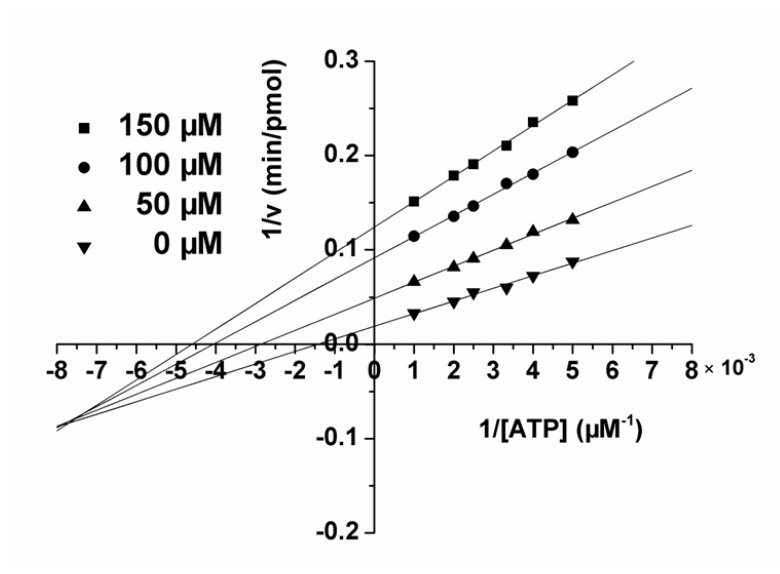

**Fig. S5** The double reciprocal Lineweaver-Burk plot for ATP-hydrolysis activity of ATPase in the absence of DNA.

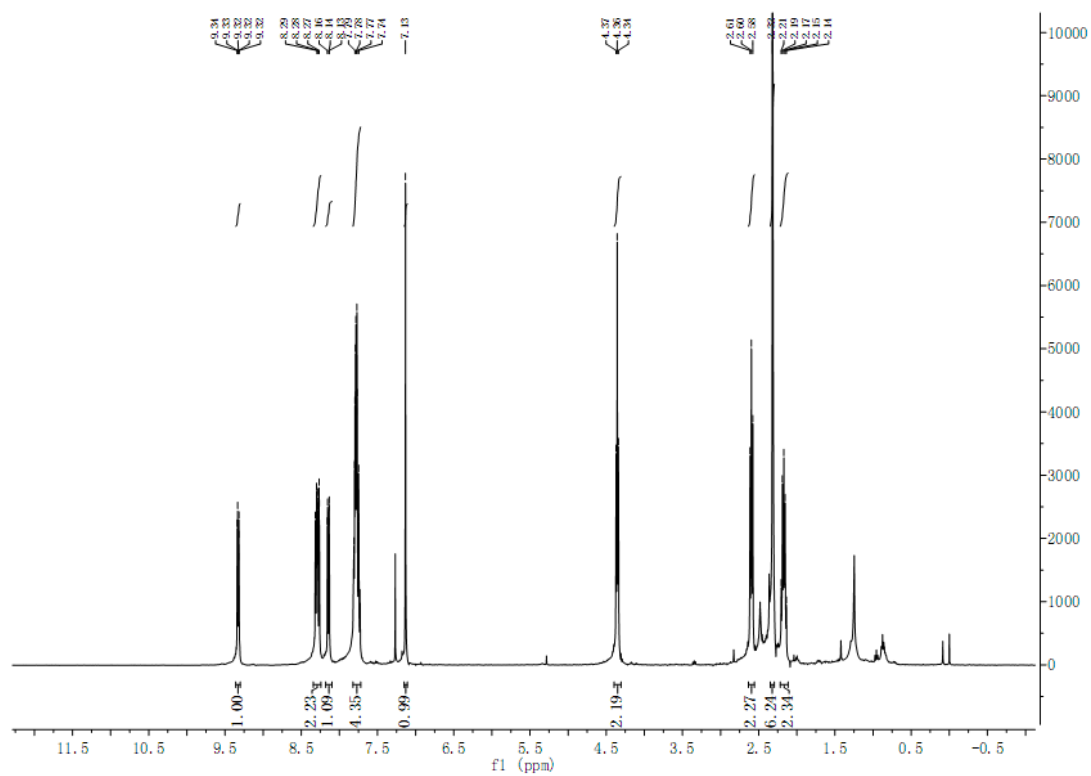

Figure S6-1.  $^1\text{H}$  NMR spectra of compound **5a-1** (400 MHz,  $\text{CDCl}_3$ )

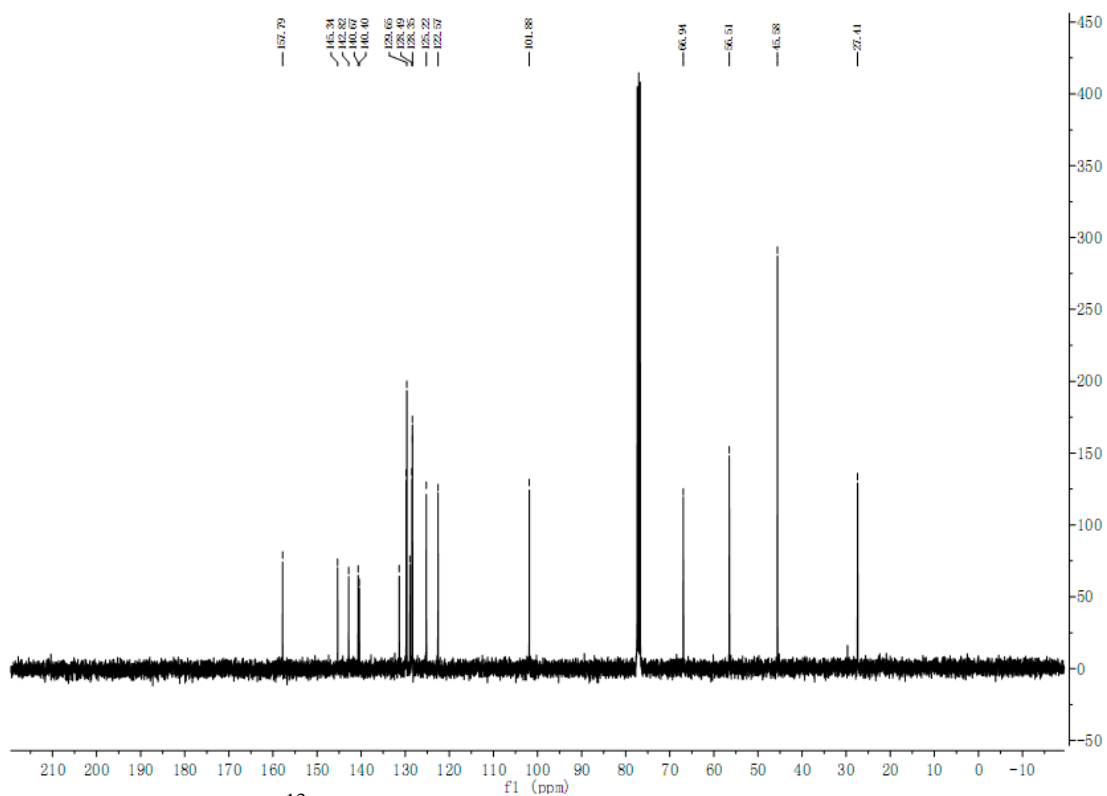

Figure S6-2.  $^{13}\text{C}$  NMR spectra of compound **5a-1** (101 MHz,  $\text{CDCl}_3$ )

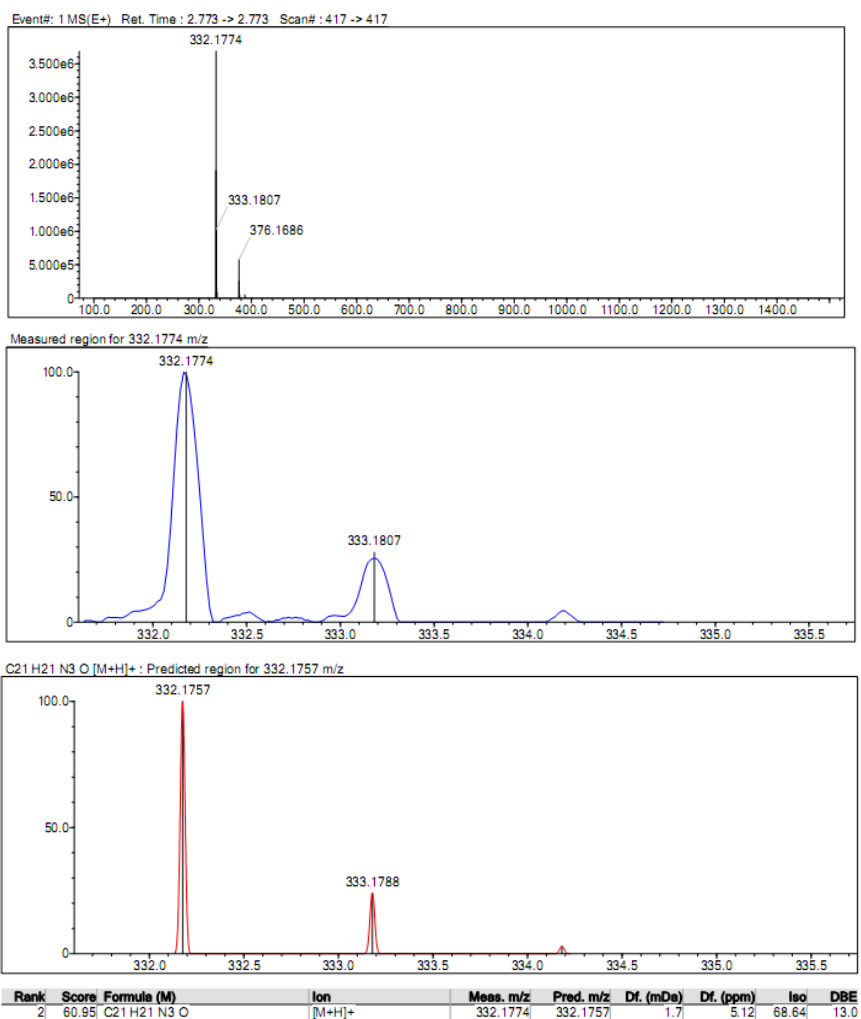

Figure S6-3. HRMS of compound 5a-1

<Chromatogram>

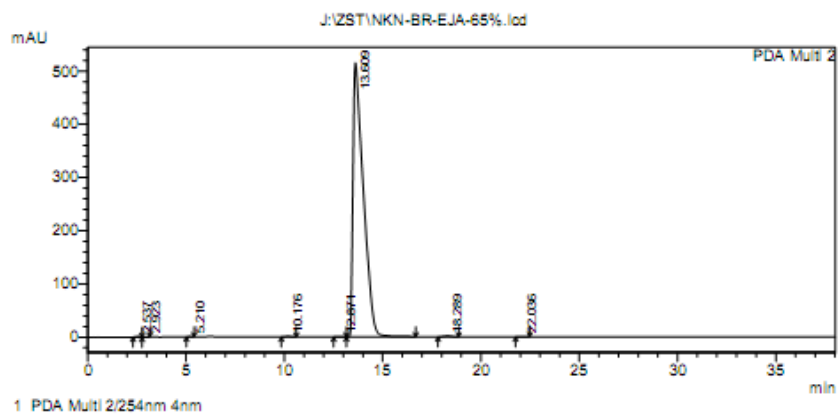

Peak Table

| Peak# | Ret. Time | Area     | Height | Area %  | Height % |
|-------|-----------|----------|--------|---------|----------|
| 1     | 2.537     | 2661.5   | 1914   | 0.141   | 0.367    |
| 2     | 2.923     | 5883     | 434    | 0.031   | 0.083    |
| 3     | 5.210     | 6438     | 527    | 0.034   | 0.101    |
| 4     | 10.176    | 22960    | 1359   | 0.122   | 0.260    |
| 5     | 12.871    | 4439     | 223    | 0.025   | 0.043    |
| 6     | 13.609    | 18778847 | 515571 | 99.378  | 98.753   |
| 7     | 18.289    | 46062    | 1835   | 0.244   | 0.352    |
| 8     | 22.036    | 5179     | 216    | 0.027   | 0.041    |
| Total |           | 18896423 | 522079 | 100.000 | 100.000  |

Figure S6-4. HPLC of compound 5a-1

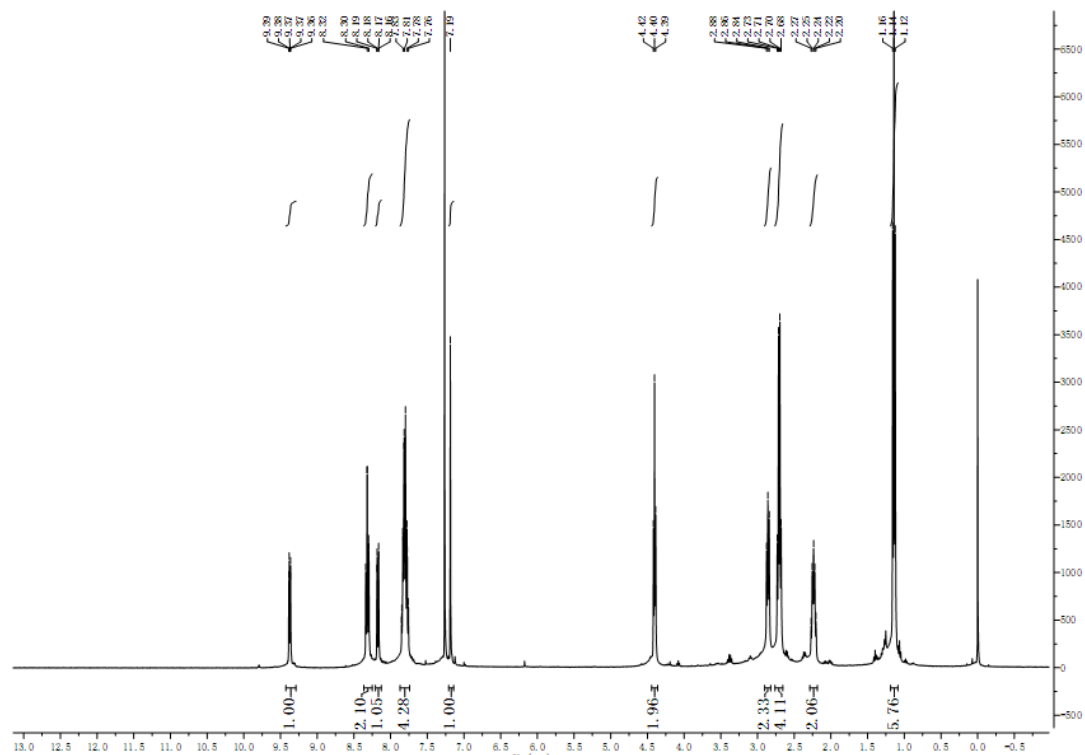

Figure S7-1.  $^1\text{H}$  NMR spectra of compound **5a-2** (400 MHz,  $\text{CDCl}_3$ )

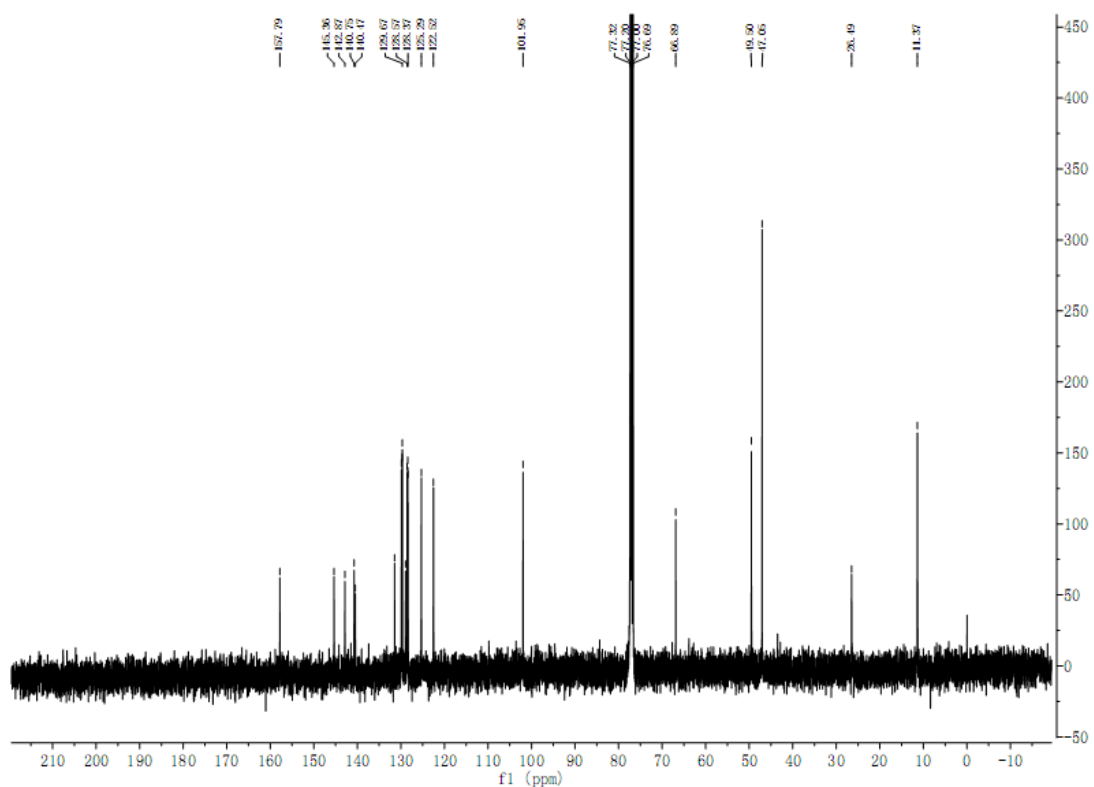

Figure S7-2.  $^{13}\text{C}$  NMR spectra of compound **5a-2** (101 MHz,  $\text{CDCl}_3$ )

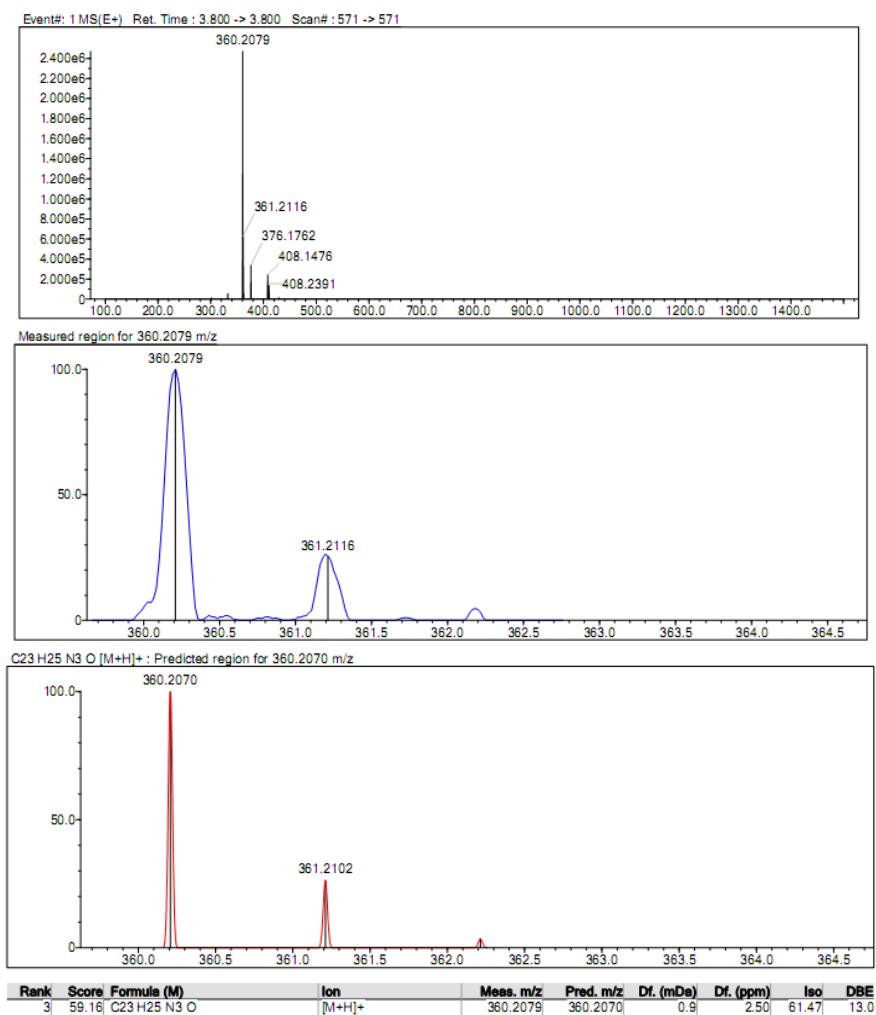

Figure S7-3. HRMS of compound 5a-2

<Chromatogram>

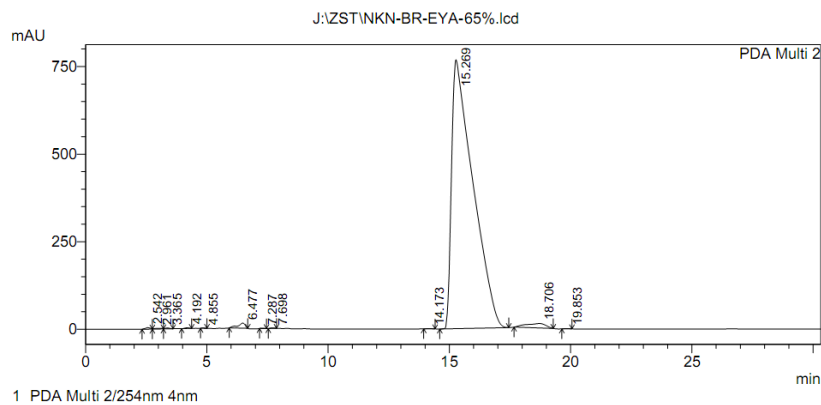

PeakTable

| Peak# | Ret. Time | Area     | Height | Area %  | Height % |
|-------|-----------|----------|--------|---------|----------|
| 1     | 2.542     | 66079    | 4553   | 0.137   | 0.561    |
| 2     | 2.961     | 43156    | 2033   | 0.090   | 0.250    |
| 3     | 3.365     | 31128    | 2426   | 0.065   | 0.299    |
| 4     | 4.192     | 27360    | 2256   | 0.057   | 0.278    |
| 5     | 4.855     | 11554    | 1205   | 0.024   | 0.148    |
| 6     | 6.477     | 315637   | 14846  | 0.656   | 1.828    |
| 7     | 7.287     | 13968    | 1317   | 0.029   | 0.162    |
| 8     | 7.698     | 19979    | 1535   | 0.042   | 0.189    |
| 9     | 14.173    | 9673     | 554    | 0.020   | 0.068    |
| 10    | 15.269    | 46864338 | 767940 | 97.348  | 94.570   |
| 11    | 18.706    | 728127   | 12700  | 1.512   | 1.564    |
| 12    | 19.853    | 10195    | 667    | 0.021   | 0.082    |
| Total |           | 48141194 | 812031 | 100.000 | 100.000  |

Figure S7-4. HPLC of compound 5a-2



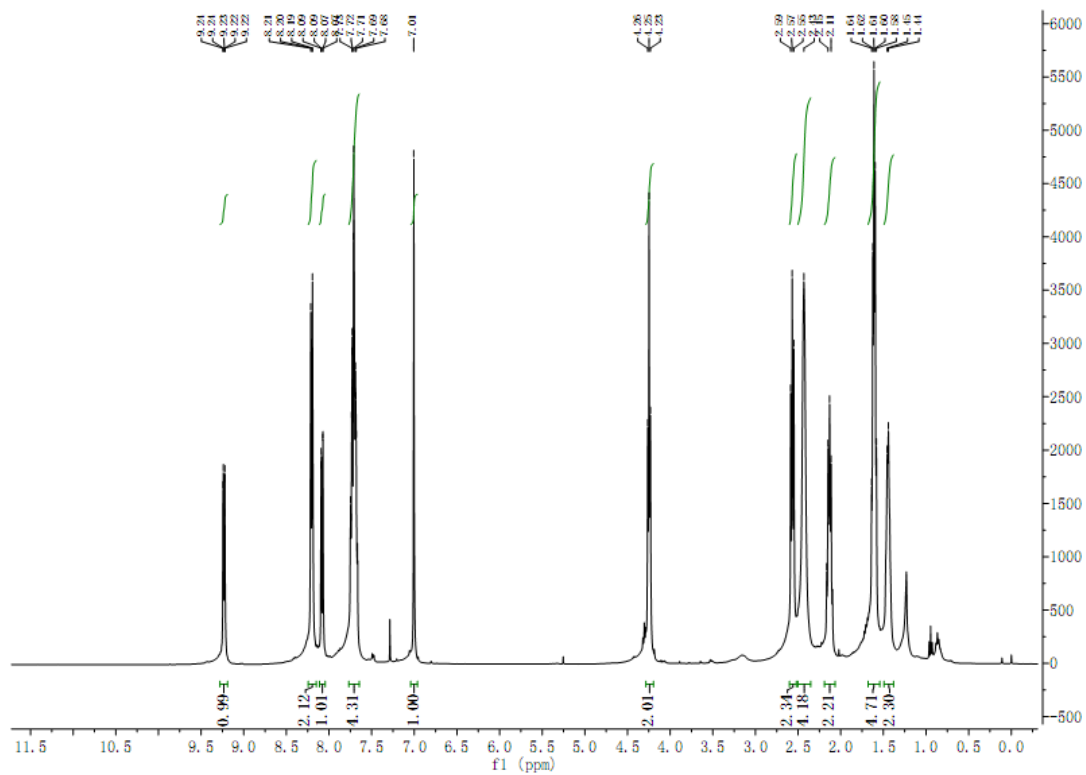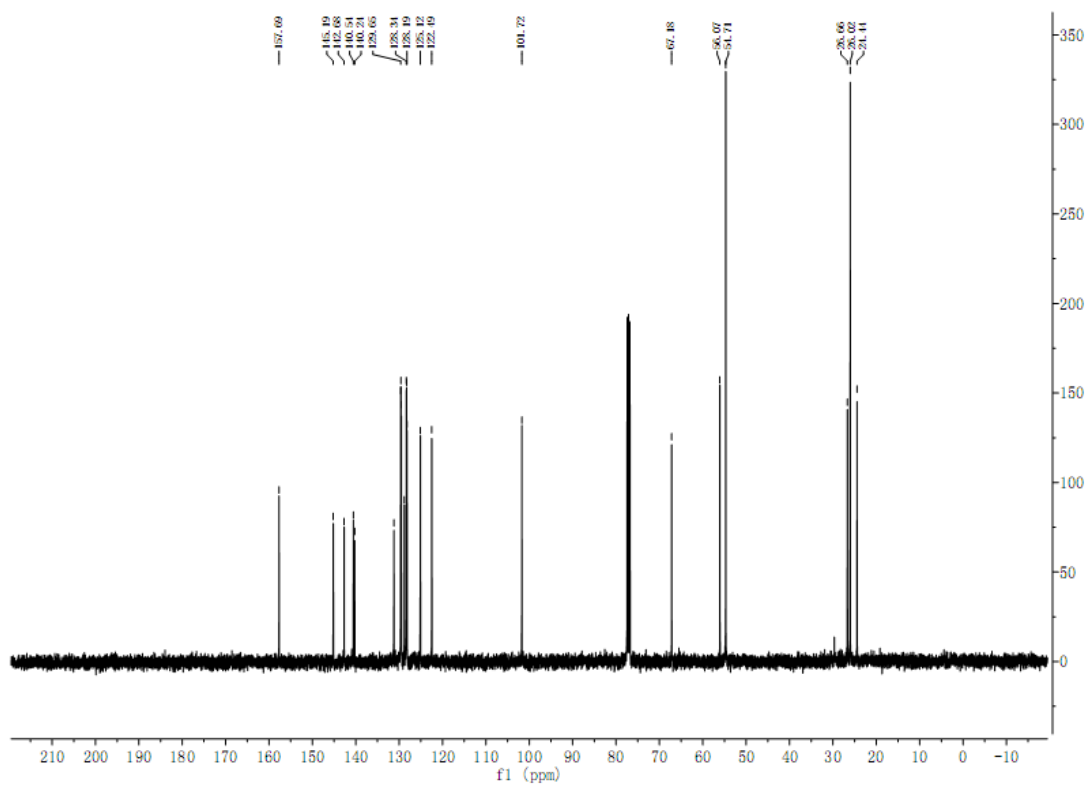

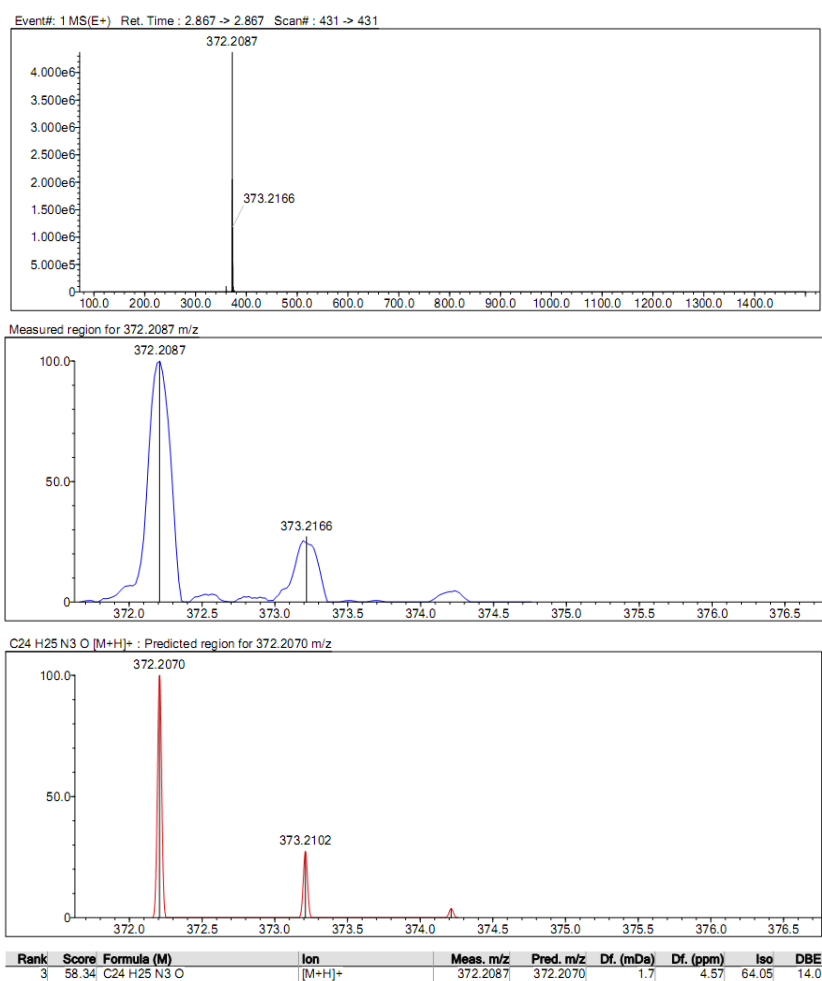

Figure S8-3. HRMS of compound 5a-3

<Chromatogram>

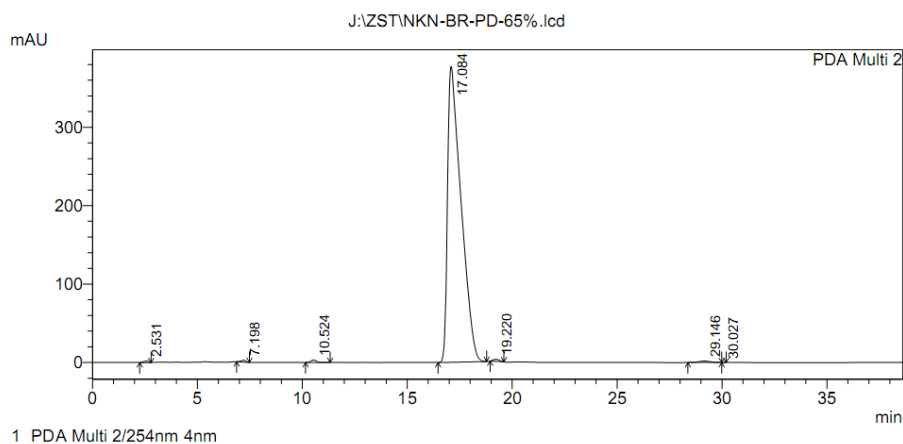

PeakTable

PDA Ch2 254nm 4nm

| Peak# | Ret. Time | Area     | Height | Area %  | Height % |
|-------|-----------|----------|--------|---------|----------|
| 1     | 2.531     | 38207    | 2060   | 0.223   | 0.528    |
| 2     | 7.198     | 36524    | 2450   | 0.213   | 0.628    |
| 3     | 10.524    | 61044    | 3252   | 0.356   | 0.833    |
| 4     | 17.084    | 16847384 | 377553 | 98.328  | 96.699   |
| 5     | 19.220    | 61723    | 2888   | 0.360   | 0.740    |
| 6     | 29.146    | 86869    | 2045   | 0.507   | 0.524    |
| 7     | 30.027    | 2071     | 194    | 0.012   | 0.050    |
| Total |           | 17133821 | 390443 | 100.000 | 100.000  |

Figure S8-4. HPLC of compound 5a-3

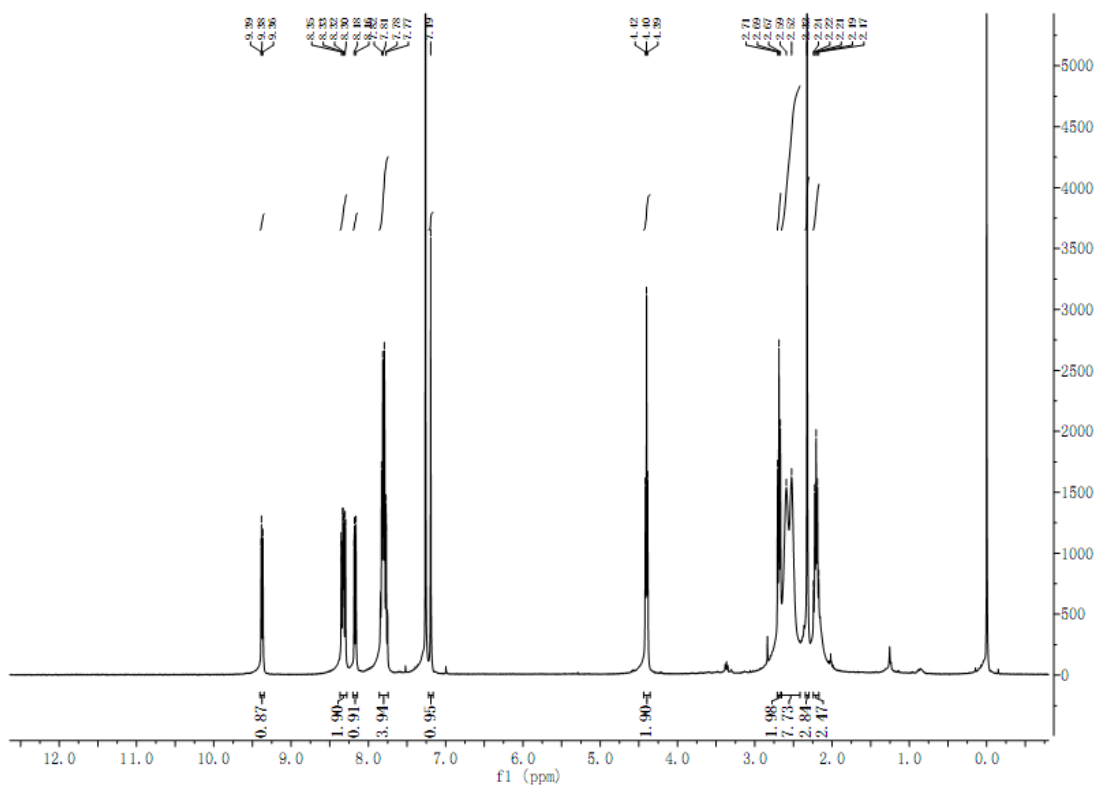

Figure S9-1.  $^1\text{H}$  NMR spectra of compound **5a-4** (400 MHz,  $\text{CDCl}_3$ )

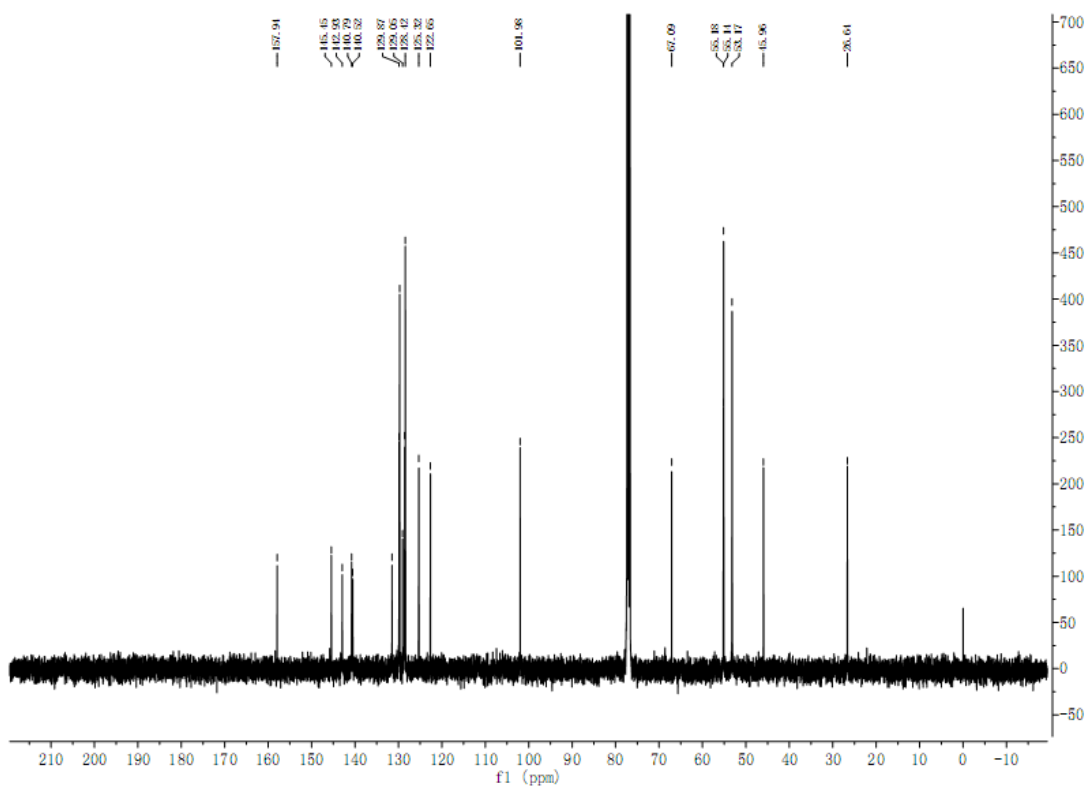

Figure S9-2.  $^{13}\text{C}$  NMR spectra of compound **5a-4** (101 MHz,  $\text{CDCl}_3$ )

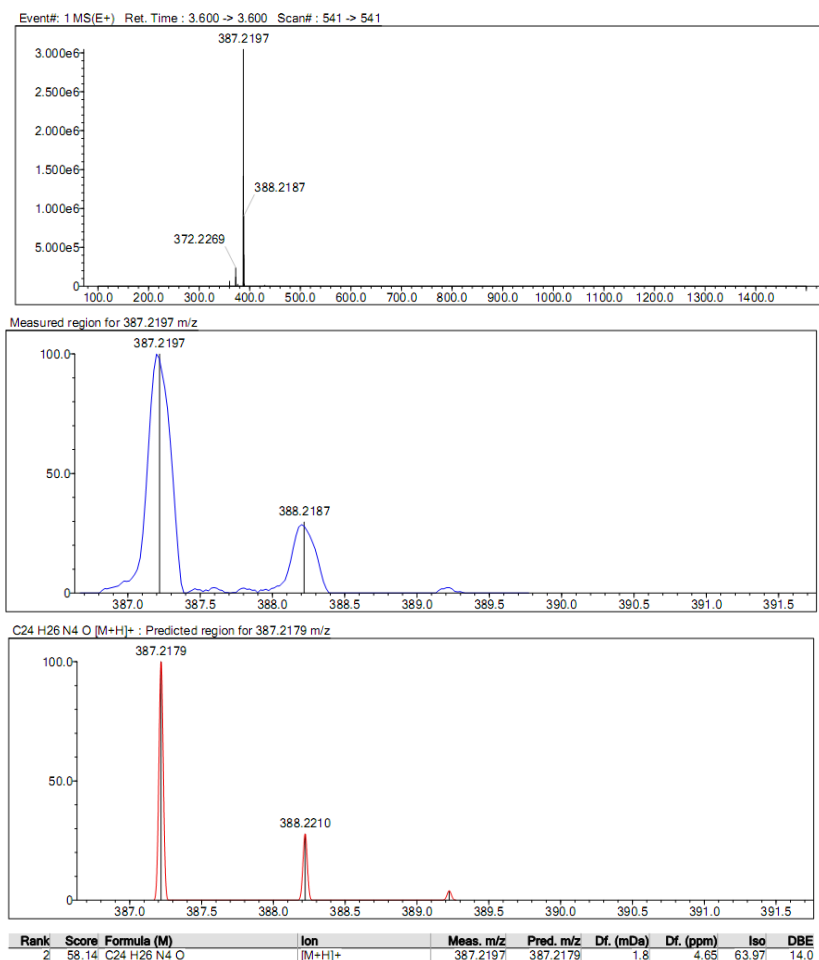

Figure S9-3. HRMS of compound 5a-4

<Chromatogram>

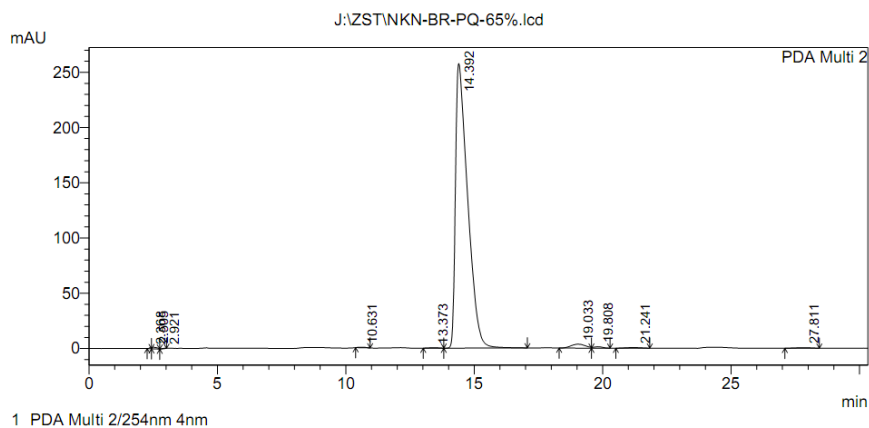

PeakTable

PDA Ch2 254nm 4nm

| Peak# | Ret. Time | Area    | Height | Area %  | Height % |
|-------|-----------|---------|--------|---------|----------|
| 1     | 2.368     | 4762    | 737    | 0.055   | 0.276    |
| 2     | 2.505     | 19201   | 1625   | 0.220   | 0.608    |
| 3     | 2.921     | 3562    | 316    | 0.041   | 0.118    |
| 4     | 10.631    | 10149   | 518    | 0.116   | 0.194    |
| 5     | 13.373    | 10866   | 417    | 0.125   | 0.156    |
| 6     | 14.392    | 8453686 | 257657 | 97.001  | 96.427   |
| 7     | 19.033    | 136724  | 3577   | 1.569   | 1.339    |
| 8     | 19.808    | 30670   | 1233   | 0.352   | 0.462    |
| 9     | 21.241    | 24207   | 577    | 0.278   | 0.216    |
| 10    | 27.811    | 21198   | 549    | 0.243   | 0.205    |
| Total |           | 8715026 | 267205 | 100.000 | 100.000  |

Figure S9-4. HPLC of compound 5a-4

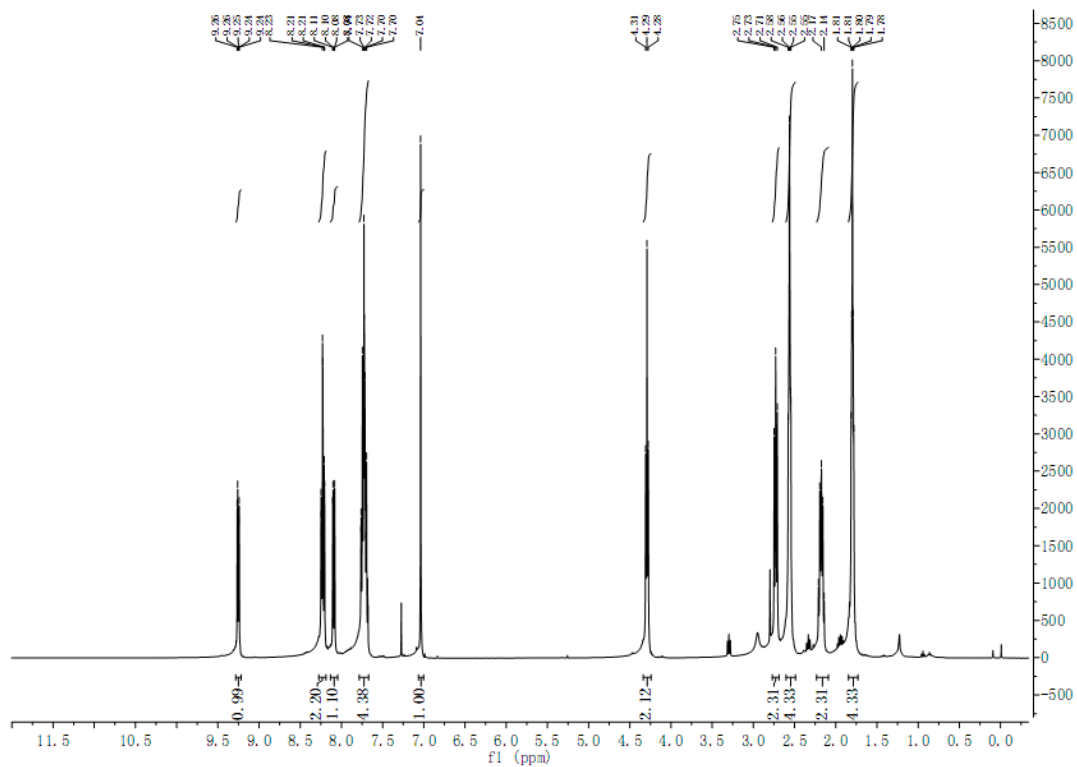

Figure S10-1. <sup>1</sup>H NMR spectra of compound **5a-5** (400 MHz, CDCl<sub>3</sub>)

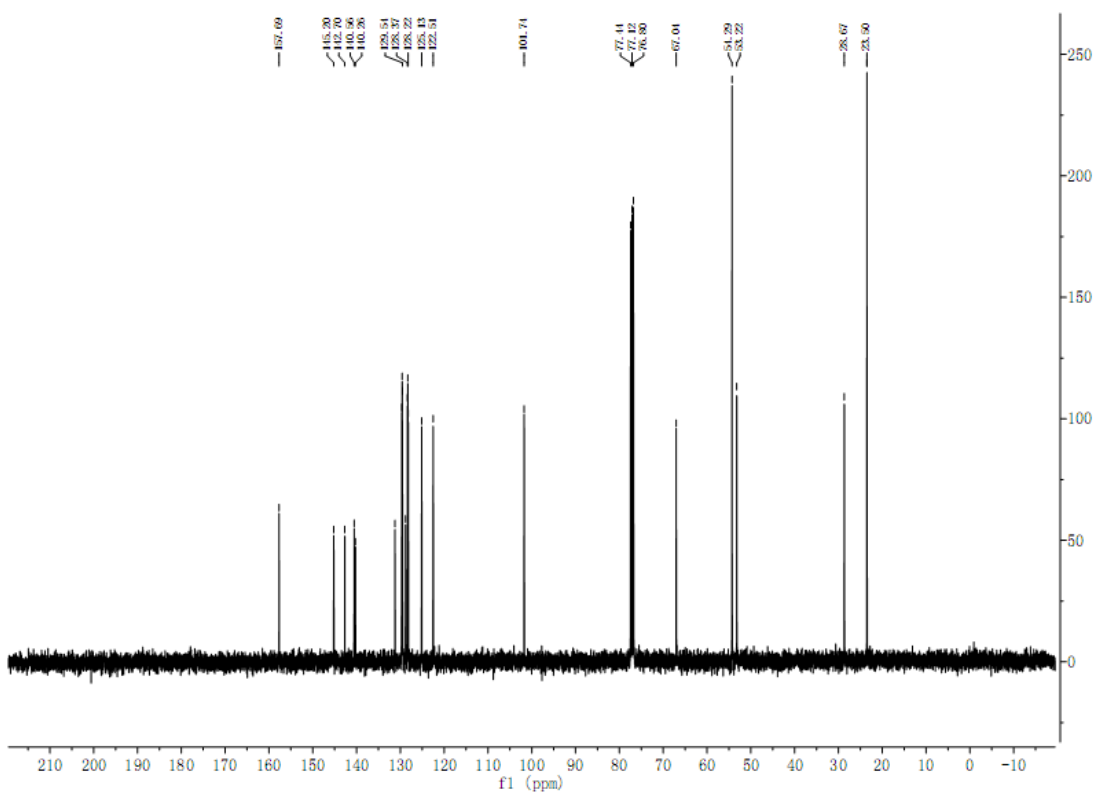

Figure S10-2. <sup>13</sup>C NMR spectra of compound **5a-5** (101 MHz, CDCl<sub>3</sub>)

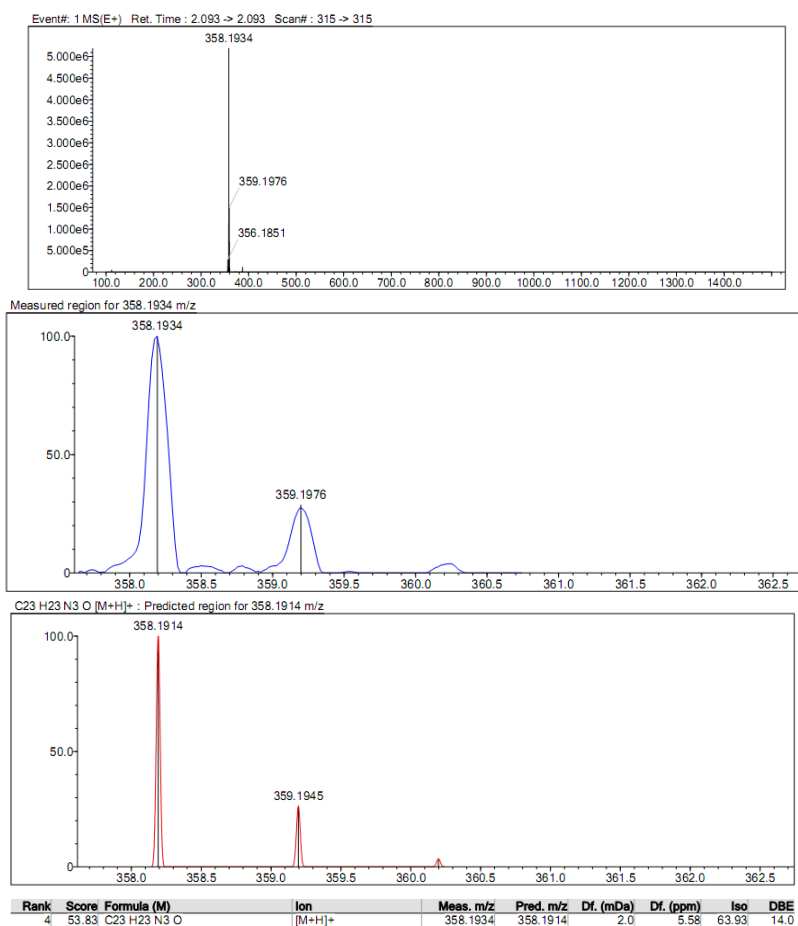

Figure S10-3. HRMS of compound 5a-5

<Chromatogram>

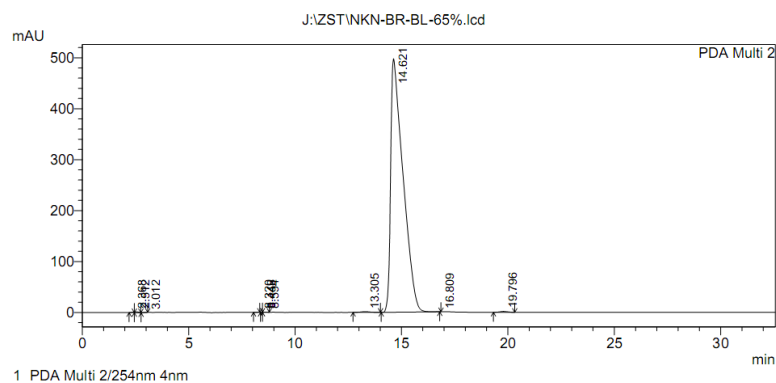

PeakTable

PDA Ch2 254nm 4nm

| Peak# | Ret. Time | Area     | Height | Area %  | Height % |
|-------|-----------|----------|--------|---------|----------|
| 1     | 2.368     | 7715     | 951    | 0.038   | 0.188    |
| 2     | 2.512     | 21548    | 1735   | 0.107   | 0.344    |
| 3     | 3.012     | 4264     | 191    | 0.021   | 0.038    |
| 4     | 8.320     | 3024     | 279    | 0.015   | 0.055    |
| 5     | 8.448     | 1629     | 320    | 0.008   | 0.063    |
| 6     | 8.594     | 4529     | 349    | 0.022   | 0.069    |
| 7     | 13.305    | 45998    | 1462   | 0.228   | 0.290    |
| 8     | 14.621    | 20028655 | 497705 | 99.342  | 98.602   |
| 9     | 16.809    | 42       | 28     | 0.000   | 0.006    |
| 10    | 19.796    | 43829    | 1740   | 0.217   | 0.345    |
| Total |           | 20161234 | 504759 | 100.000 | 100.000  |

Figure S10-4. HPLC of compound 5a-5

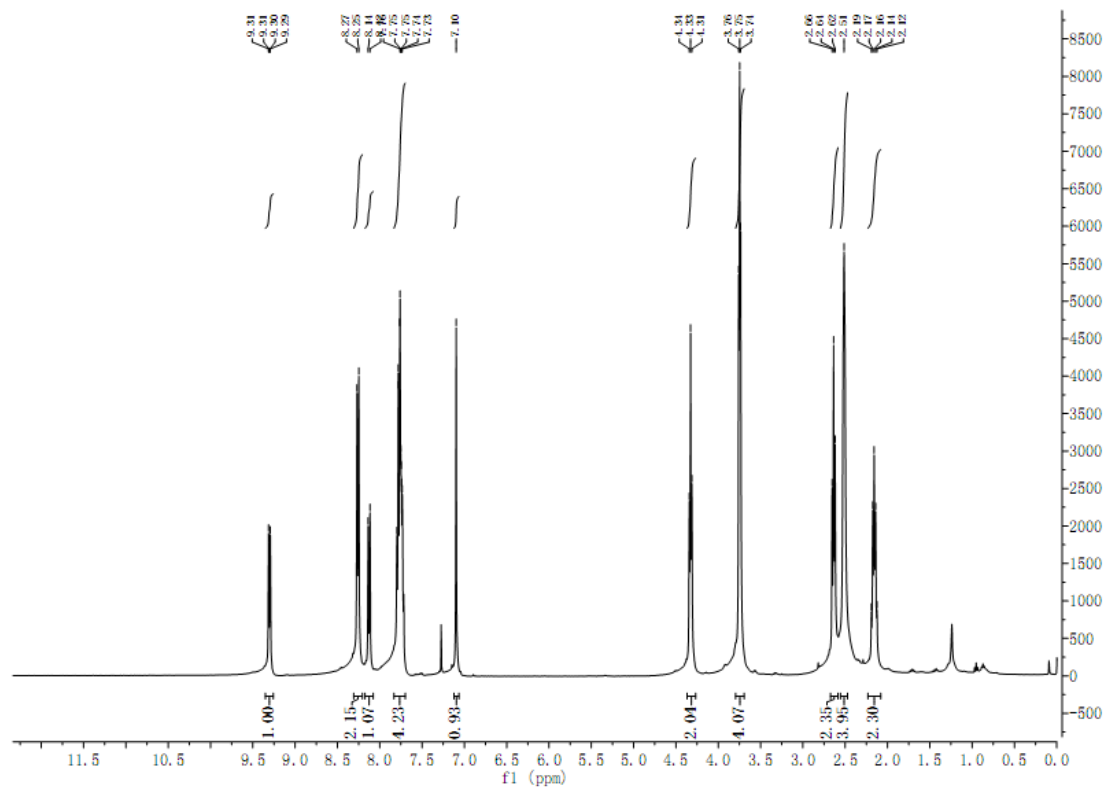

Figure S11-1.  $^1\text{H}$  NMR spectra of compound **5a-6** (400 MHz,  $\text{CDCl}_3$ )

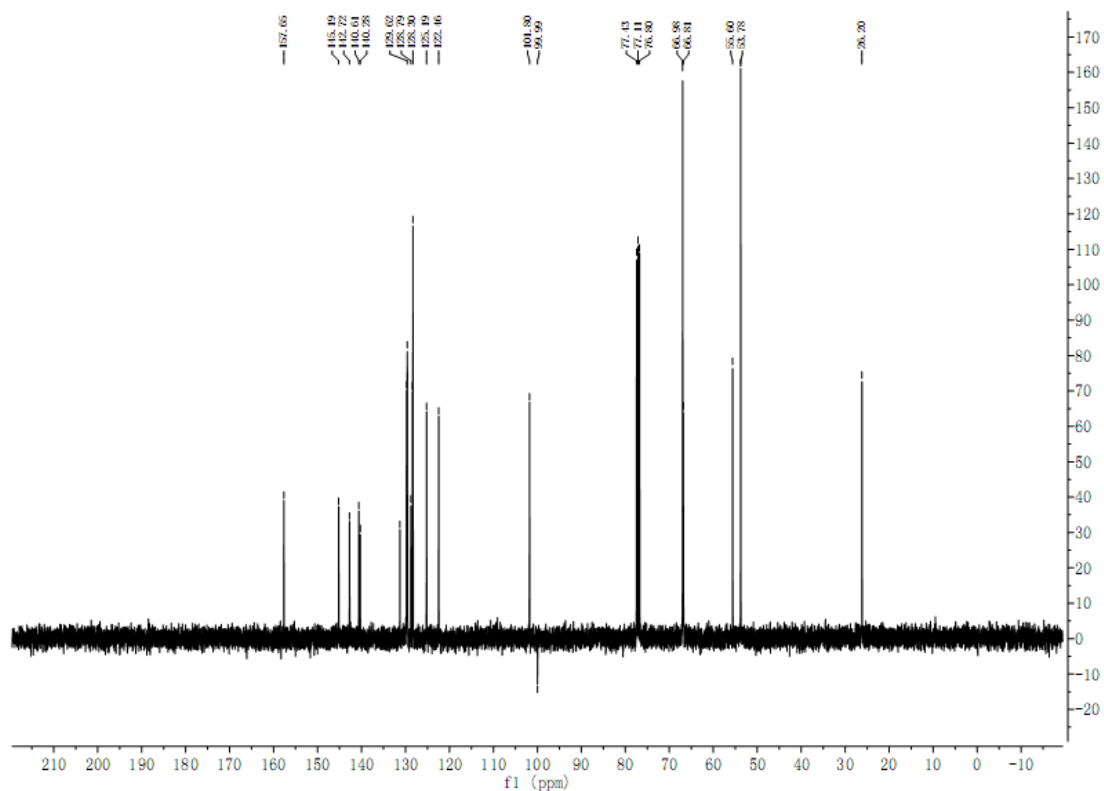

Figure S11-2.  $^{13}\text{C}$  NMR spectra of compound **5a-6** (101 MHz,  $\text{CDCl}_3$ )

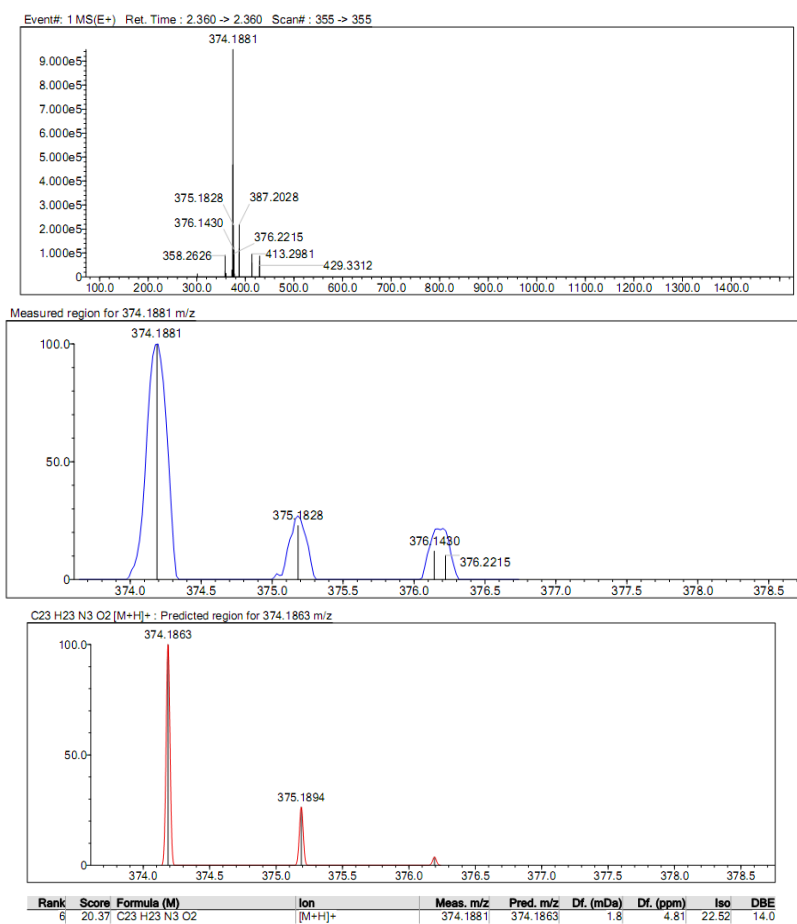

Figure S11-3. HRMS of compound 5a-6

<Chromatogram>

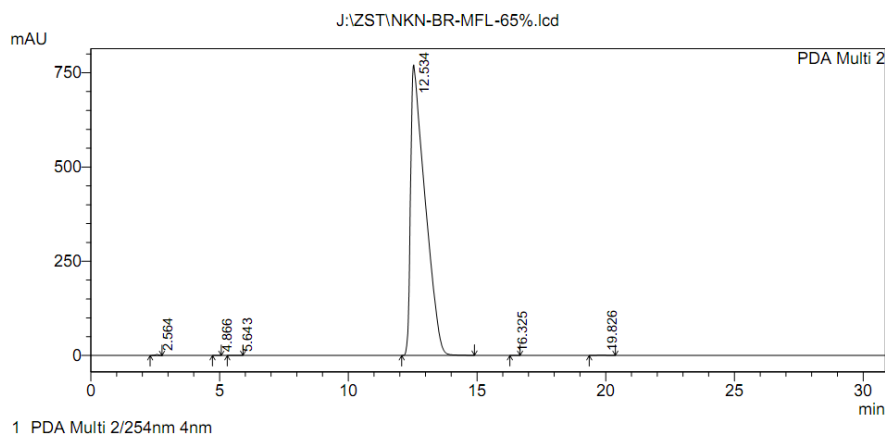

PeakTable

PDA Ch2 254nm 4nm

| Peak# | Ret. Time | Area     | Height | Area %  | Height % |
|-------|-----------|----------|--------|---------|----------|
| 1     | 2.564     | 39742    | 2952   | 0.132   | 0.381    |
| 2     | 4.866     | 2469     | 244    | 0.008   | 0.031    |
| 3     | 5.643     | 9606     | 623    | 0.032   | 0.080    |
| 4     | 12.534    | 30004204 | 770771 | 99.727  | 99.337   |
| 5     | 16.325    | 2828     | 170    | 0.009   | 0.022    |
| 6     | 19.826    | 27527    | 1158   | 0.091   | 0.149    |
| Total |           | 30086374 | 775919 | 100.000 | 100.000  |

Figure S11-4. HPLC of compound 5a-6



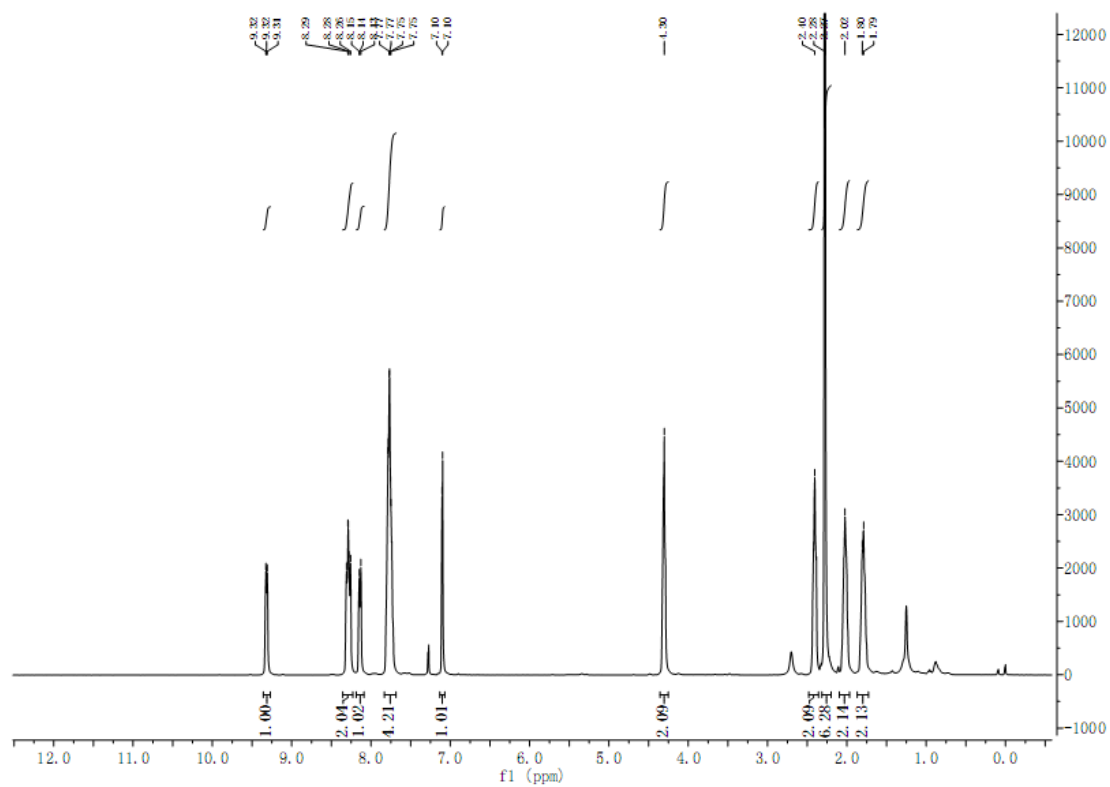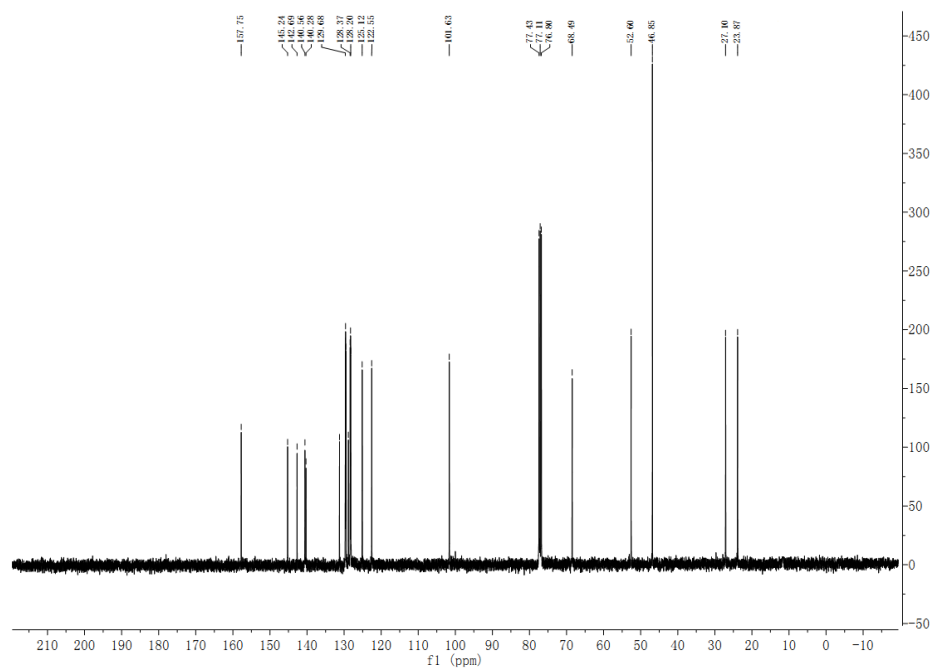

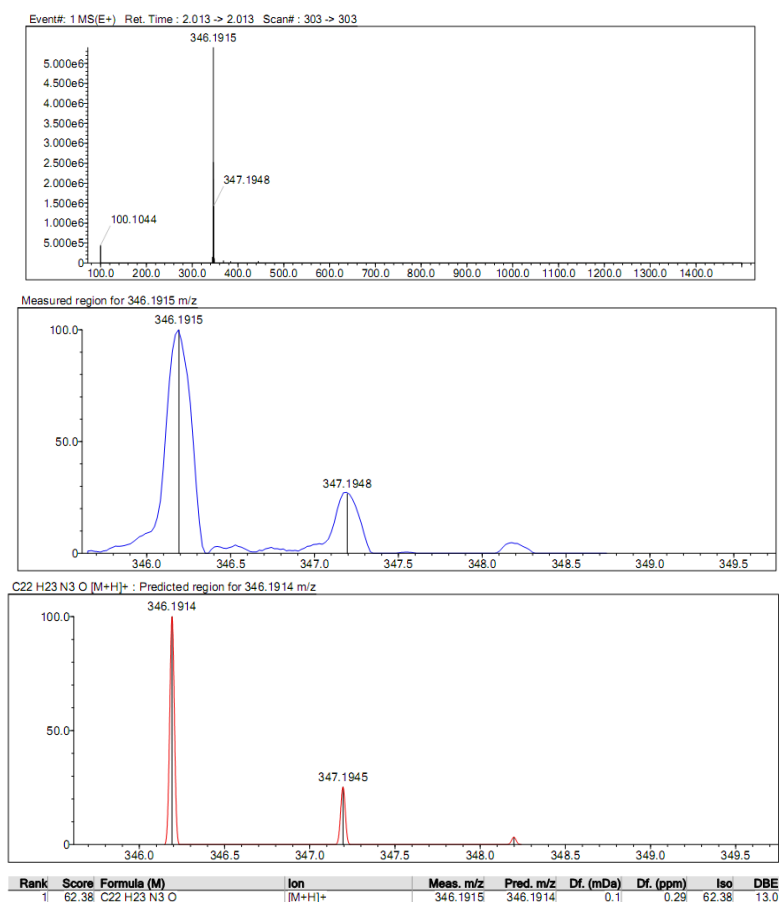

Figure S12-3. HRMS of compound **6a-1**

<Chromatogram>

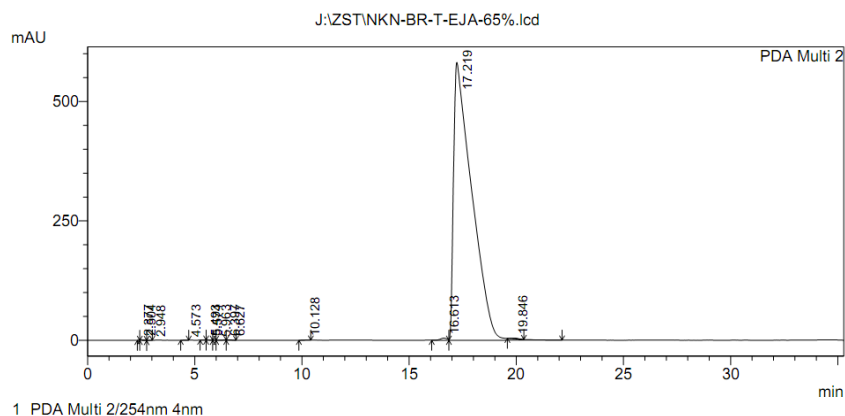

1 PDA Multi 2/254nm 4nm

PeakTable

| Peak# | Ret. Time | Area     | Height | Area %  | Height % |
|-------|-----------|----------|--------|---------|----------|
| 1     | 2.377     | 4020     | 715    | 0.012   | 0.121    |
| 2     | 2.504     | 20040    | 1591   | 0.058   | 0.268    |
| 3     | 2.948     | 3304     | 231    | 0.010   | 0.039    |
| 4     | 4.573     | 2938     | 282    | 0.009   | 0.048    |
| 5     | 5.493     | 2246     | 250    | 0.007   | 0.042    |
| 6     | 5.574     | 3600     | 271    | 0.010   | 0.046    |
| 7     | 5.963     | 955      | 119    | 0.003   | 0.020    |
| 8     | 6.397     | 9647     | 542    | 0.028   | 0.091    |
| 9     | 6.627     | 12473    | 839    | 0.036   | 0.141    |
| 10    | 10.128    | 8175     | 488    | 0.024   | 0.082    |
| 11    | 16.613    | 96779    | 4457   | 0.281   | 0.751    |
| 12    | 17.219    | 34275400 | 581804 | 99.405  | 98.069   |
| 13    | 19.846    | 41082    | 1667   | 0.119   | 0.281    |
| Total |           | 34480660 | 593258 | 100.000 | 100.000  |

Figure S12-4. HPLC of compound **6a-1**

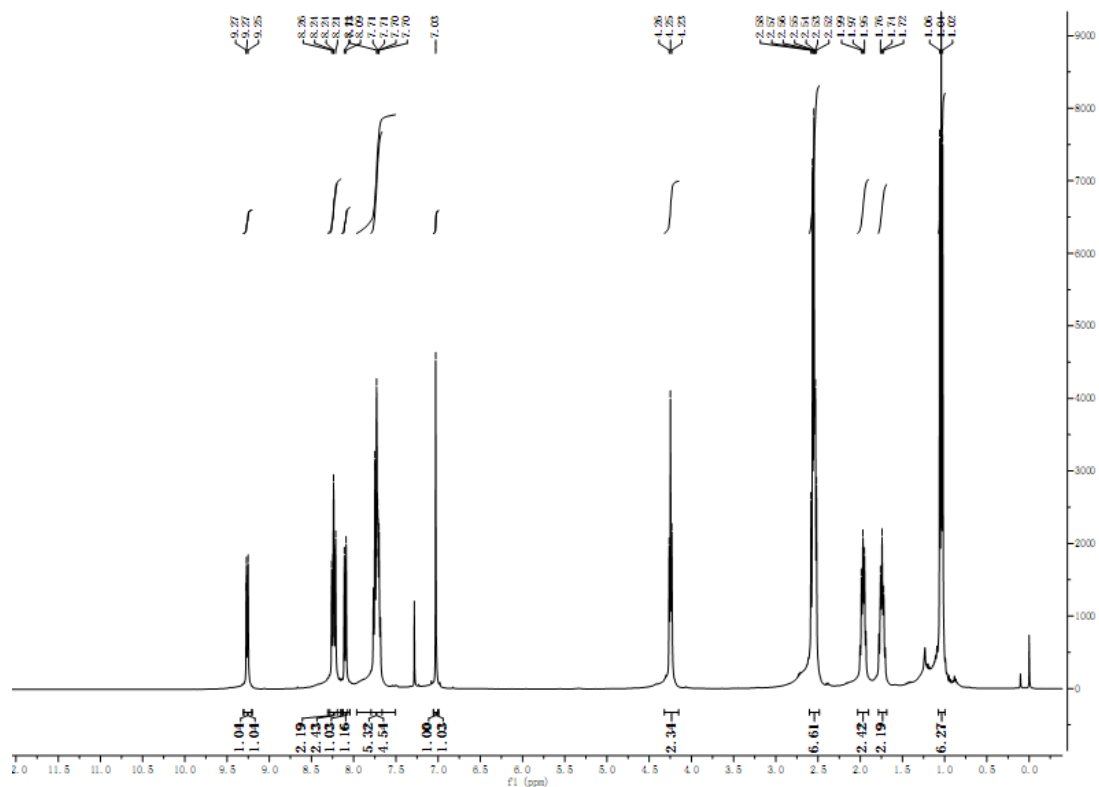

Figure S13-1.  $^1\text{H}$  NMR spectra of compound **6a-2** (400 MHz,  $\text{CDCl}_3$ )

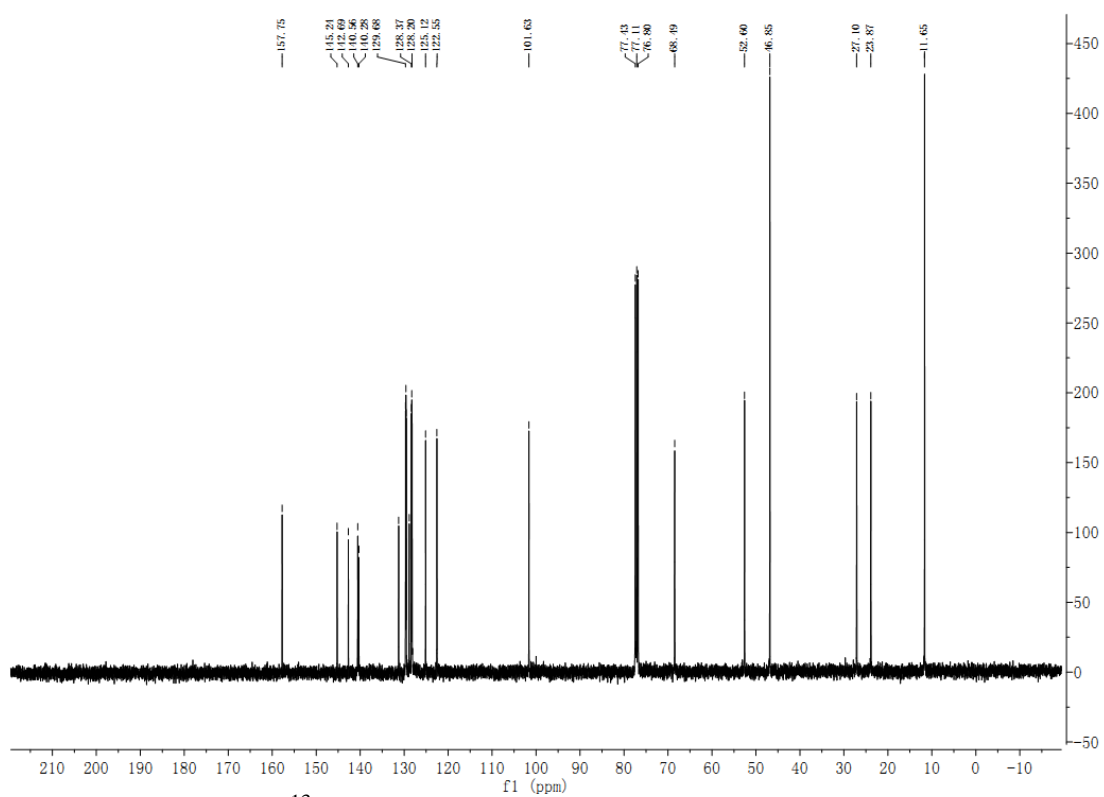

Figure S13-2.  $^{13}\text{C}$  NMR spectra of compound **6a-2** (101 MHz,  $\text{CDCl}_3$ )

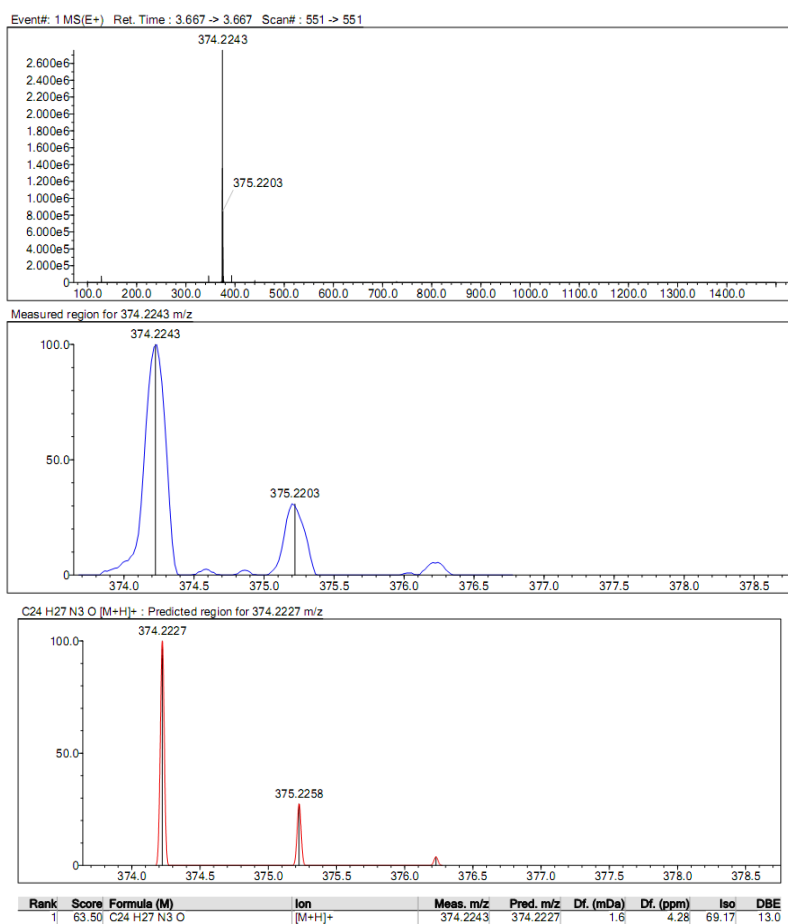

Figure S13-3. HRMS of compound **6a-2**

<Chromatogram>

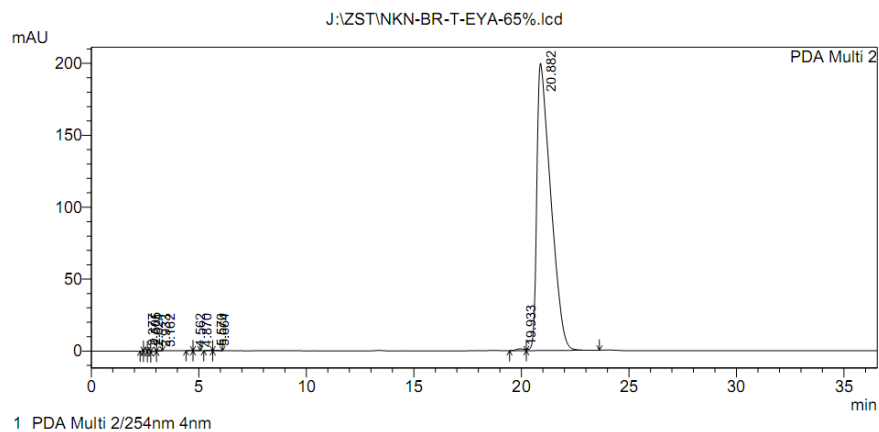

PeakTable

PDA Ch2 254nm 4nm

| Peak# | Ret. Time | Area    | Height | Area %  | Height % |
|-------|-----------|---------|--------|---------|----------|
| 1     | 2.377     | 3890    | 818    | 0.043   | 0.396    |
| 2     | 2.505     | 13316   | 1578   | 0.148   | 0.763    |
| 3     | 2.624     | 8011    | 1276   | 0.089   | 0.617    |
| 4     | 2.933     | 6683    | 567    | 0.074   | 0.274    |
| 5     | 3.162     | 4490    | 397    | 0.050   | 0.192    |
| 6     | 4.562     | 3222    | 282    | 0.036   | 0.136    |
| 7     | 4.870     | 2757    | 239    | 0.031   | 0.116    |
| 8     | 5.570     | 5091    | 303    | 0.056   | 0.147    |
| 9     | 5.664     | 3317    | 273    | 0.037   | 0.132    |
| 10    | 19.933    | 35310   | 1310   | 0.391   | 0.634    |
| 11    | 20.882    | 8934401 | 199724 | 99.046  | 96.593   |
| Total |           | 9020488 | 206769 | 100.000 | 100.000  |

Figure S13-4. HPLC of compound **6a-2**

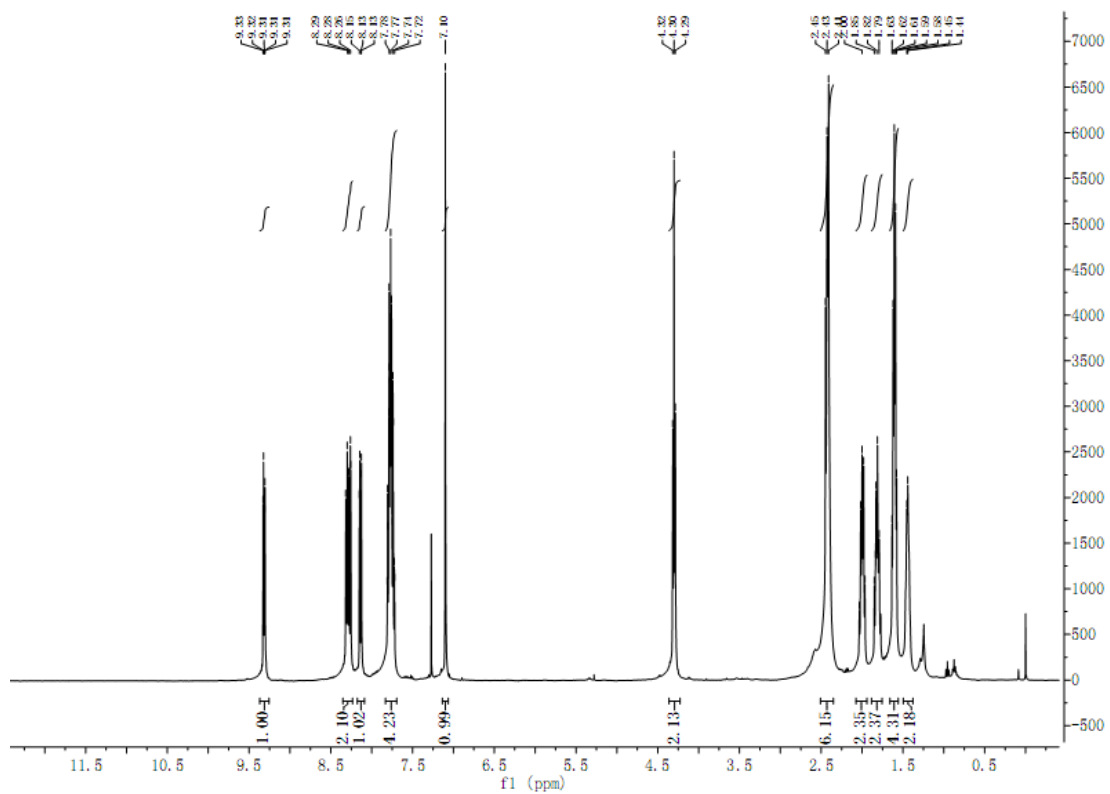

Figure S14-1. <sup>1</sup>H NMR spectra of compound **6a-3** (400 MHz, CDCl<sub>3</sub>)

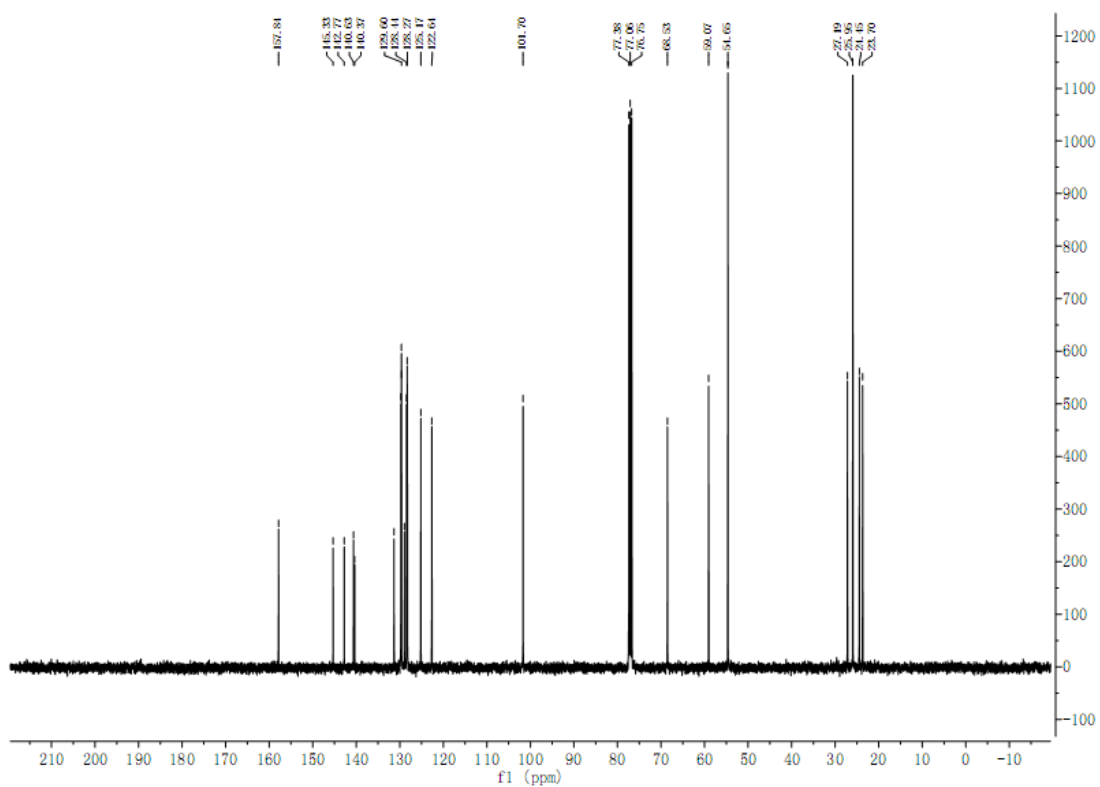

Figure S14-2. <sup>13</sup>C NMR spectra of compound **6a-3** (101 MHz, CDCl<sub>3</sub>)

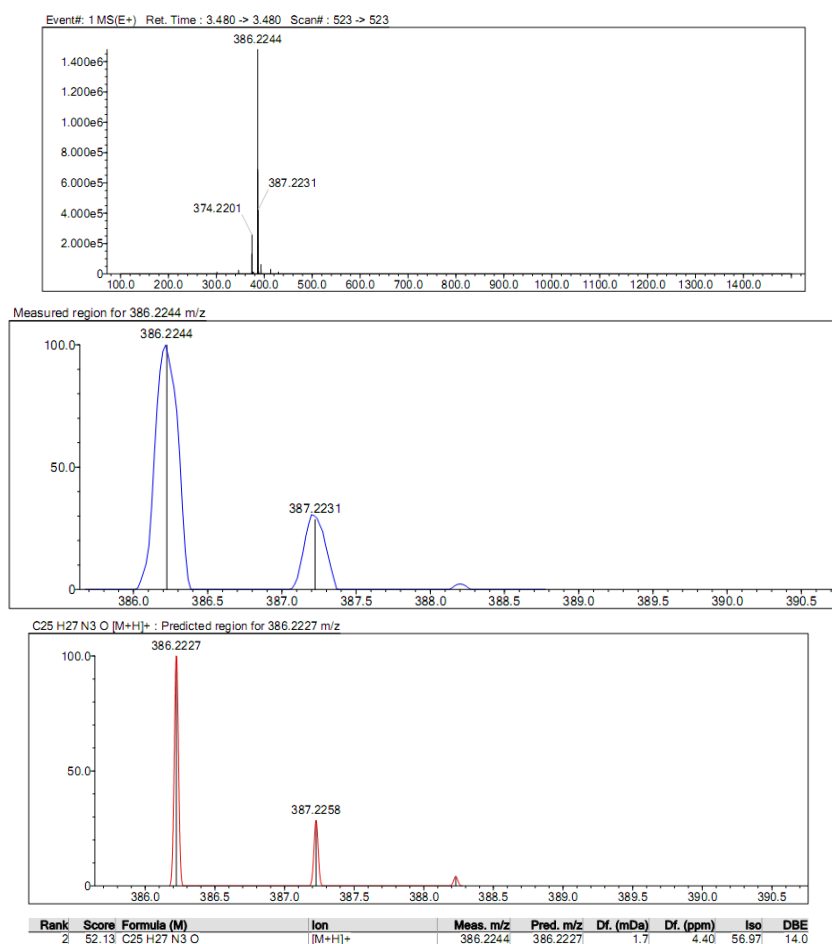

Figure S14-3. HRMS of compound **6a-3**

<Chromatogram>

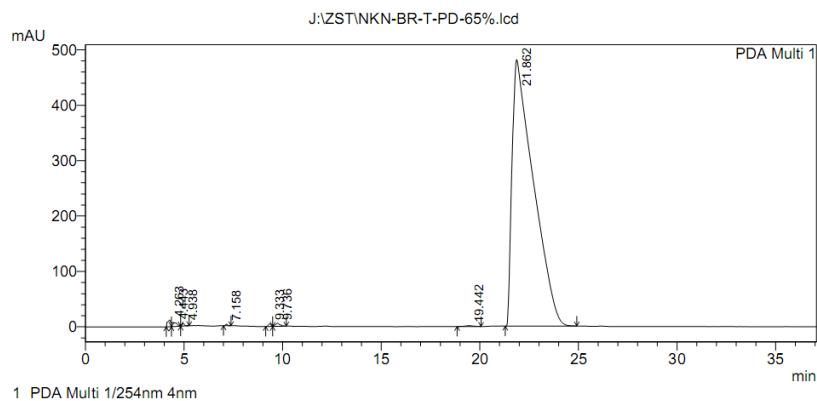

PeakTable

PDA Ch1 254nm 4nm

| Peak# | Ret. Time | Area     | Height | Area %  | Height % |
|-------|-----------|----------|--------|---------|----------|
| 1     | 4.263     | 140125   | 12310  | 0.382   | 2.371    |
| 2     | 4.443     | 127567   | 6857   | 0.348   | 1.321    |
| 3     | 4.938     | 38628    | 4810   | 0.105   | 0.926    |
| 4     | 7.158     | 22082    | 2677   | 0.060   | 0.516    |
| 5     | 9.333     | 45262    | 4543   | 0.123   | 0.875    |
| 6     | 9.736     | 91208    | 5661   | 0.248   | 1.090    |
| 7     | 19.442    | 39150    | 1284   | 0.107   | 0.247    |
| 8     | 21.862    | 36204597 | 481065 | 98.627  | 92.654   |
| Total |           | 36708620 | 519207 | 100.000 | 100.000  |

Figure S14-4. HPLC of compound **6a-3**

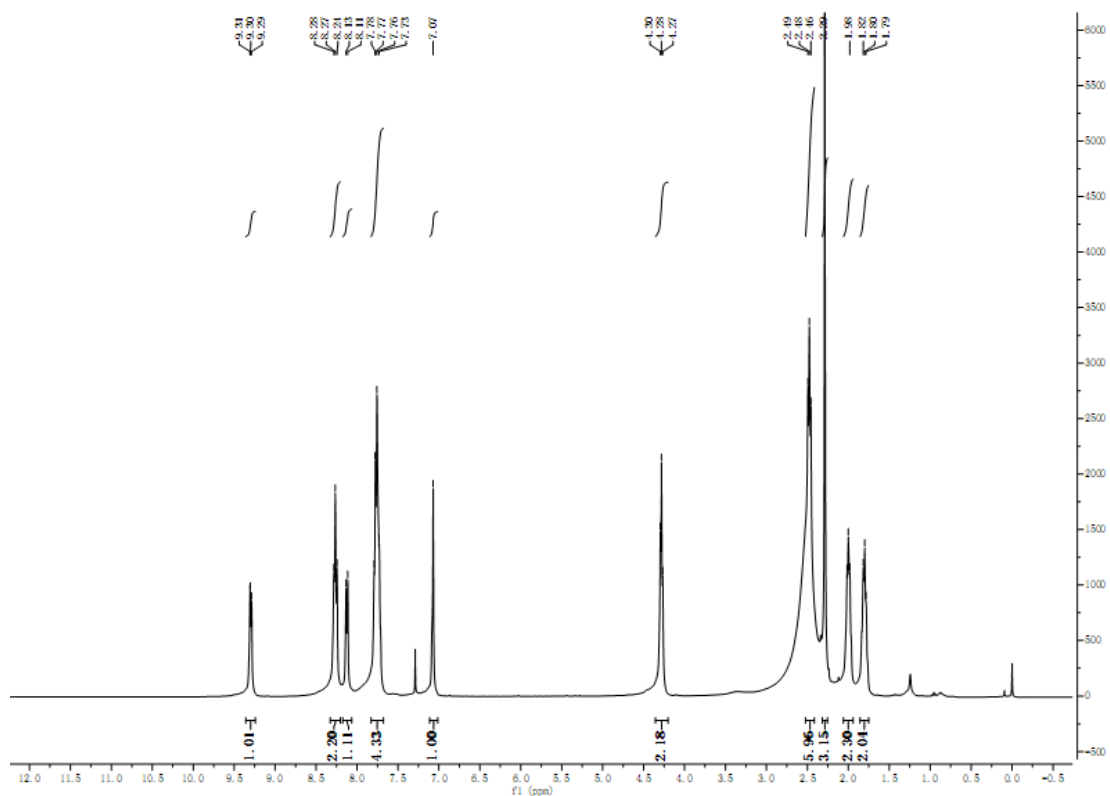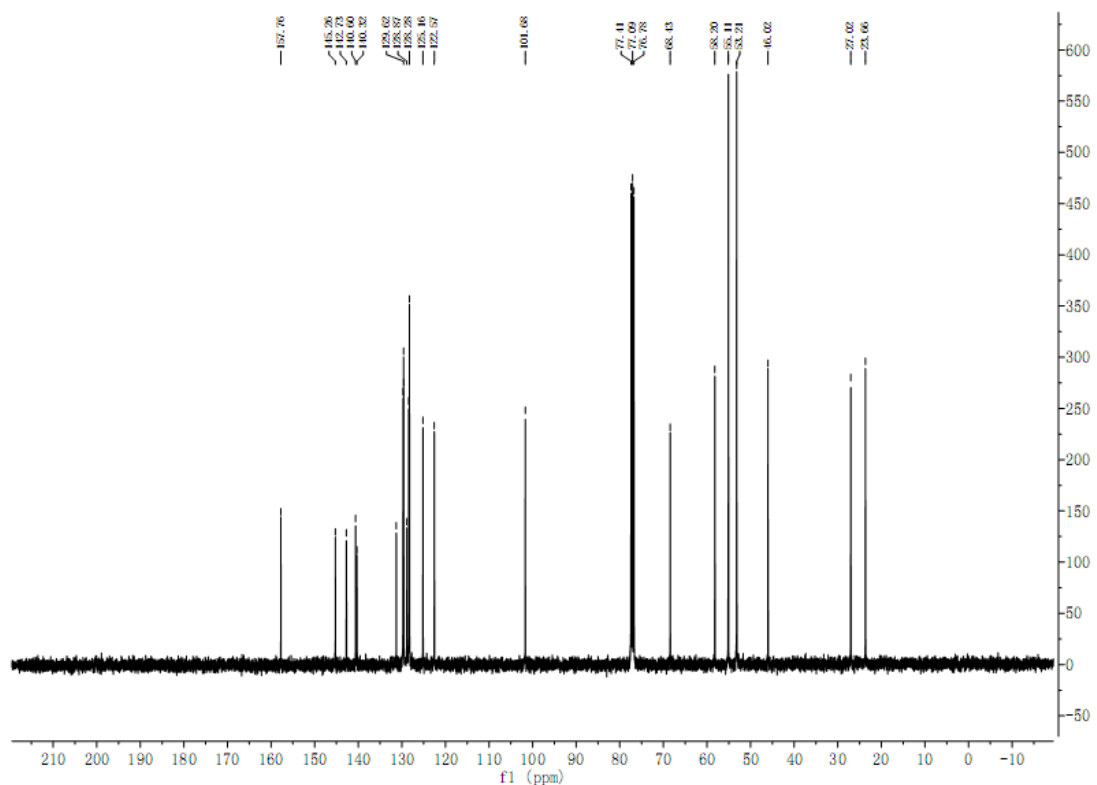

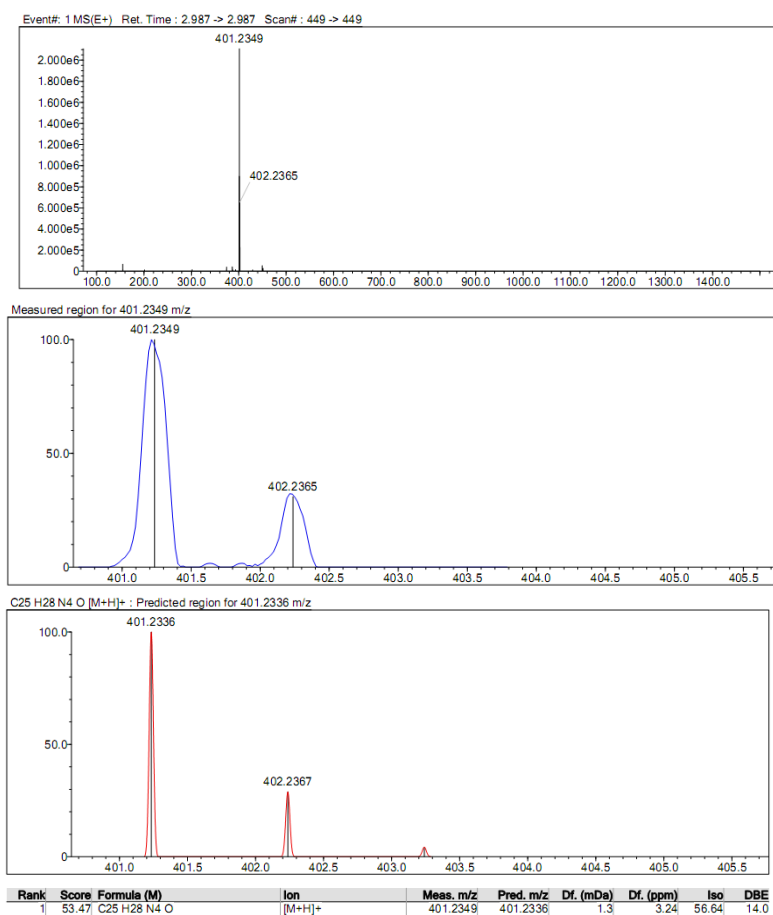

Figure S15-3. HRMS of compound **6a-4**

<Chromatogram>

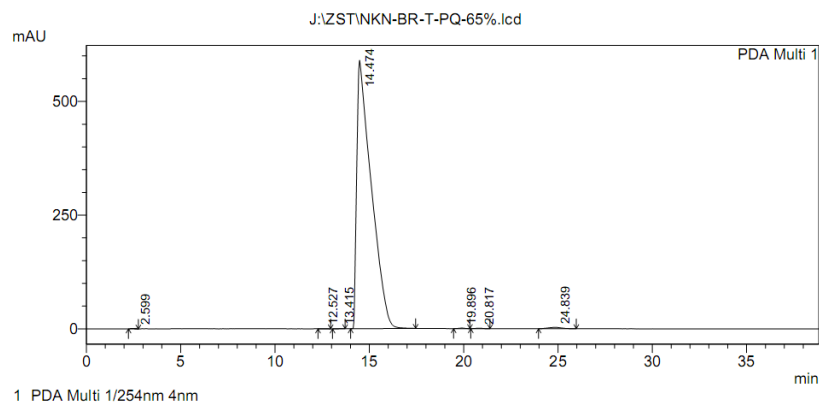

PeakTable

| Peak# | Ret. Time | Area     | Height | Area %  | Height % |
|-------|-----------|----------|--------|---------|----------|
| 1     | 2.599     | 30341    | 1586   | 0.096   | 0.265    |
| 2     | 12.527    | 8313     | 398    | 0.026   | 0.067    |
| 3     | 13.415    | 6853     | 336    | 0.022   | 0.056    |
| 4     | 14.474    | 31483616 | 590061 | 99.210  | 98.751   |
| 5     | 19.896    | 25630    | 1126   | 0.081   | 0.188    |
| 6     | 20.817    | 28874    | 1043   | 0.091   | 0.175    |
| 7     | 24.839    | 150832   | 2975   | 0.475   | 0.498    |
| Total |           | 31734459 | 597525 | 100.000 | 100.000  |

Figure S15-4. HPLC of compound **6a-4**



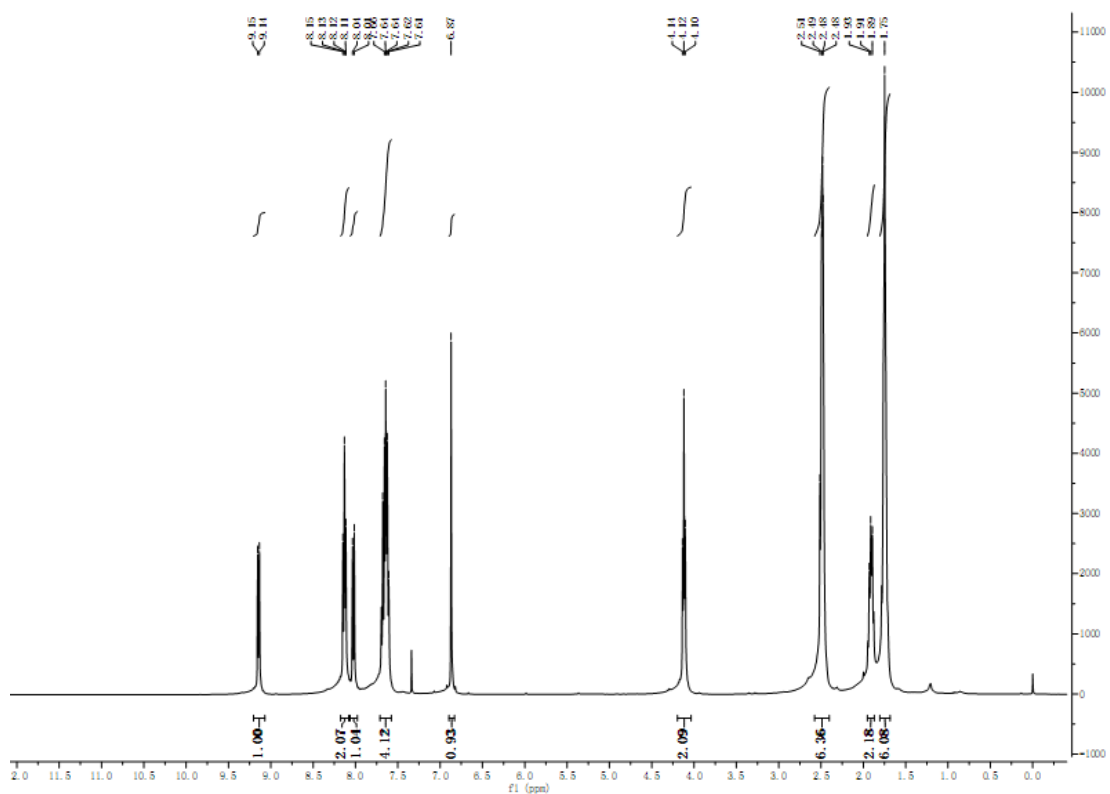

Figure S16-1.  $^1\text{H}$  NMR spectra of compound **6a-5** (400 MHz,  $\text{CDCl}_3$ )

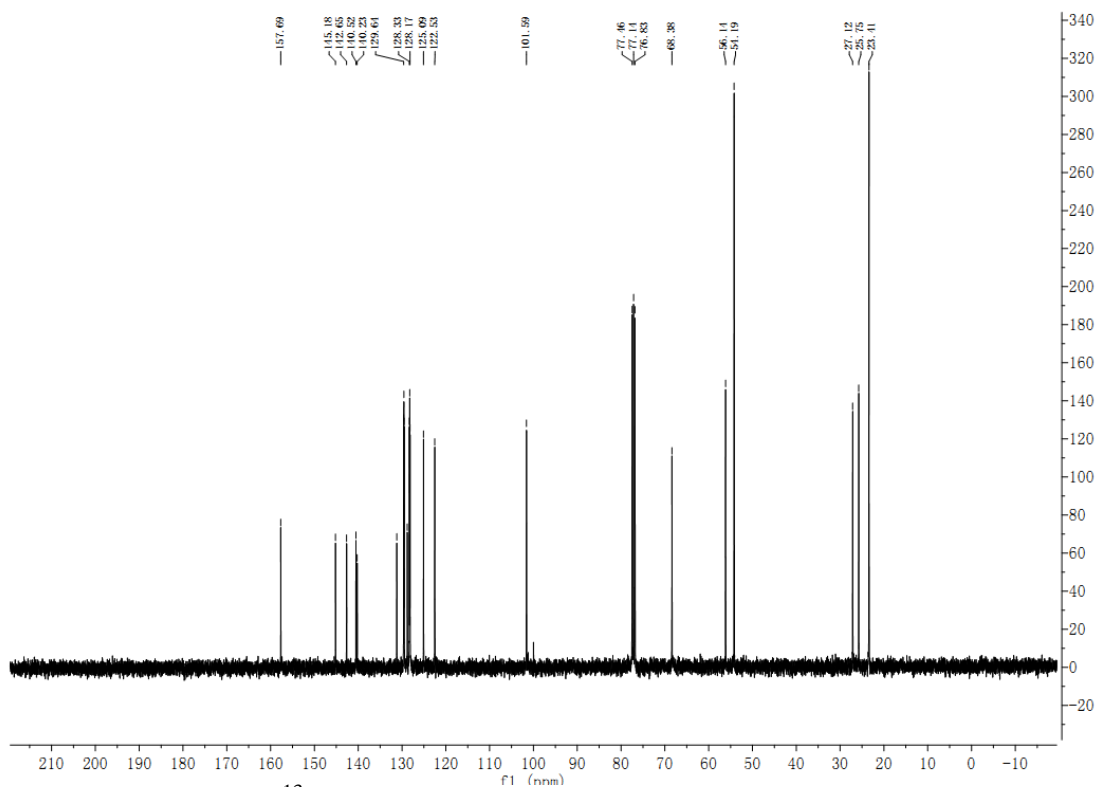

Figure S16-2.  $^{13}\text{C}$  NMR spectra of compound **6a-5** (101 MHz,  $\text{CDCl}_3$ )

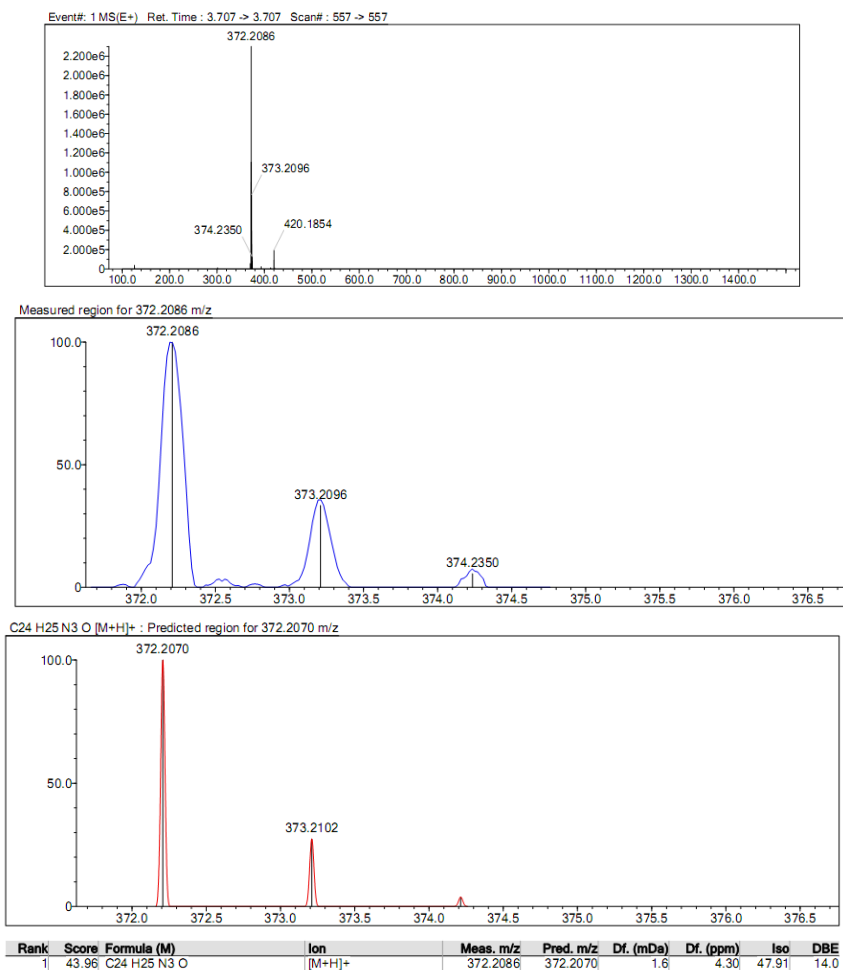

Figure S16-3. HRMS of compound 6a-5

<Chromatogram>

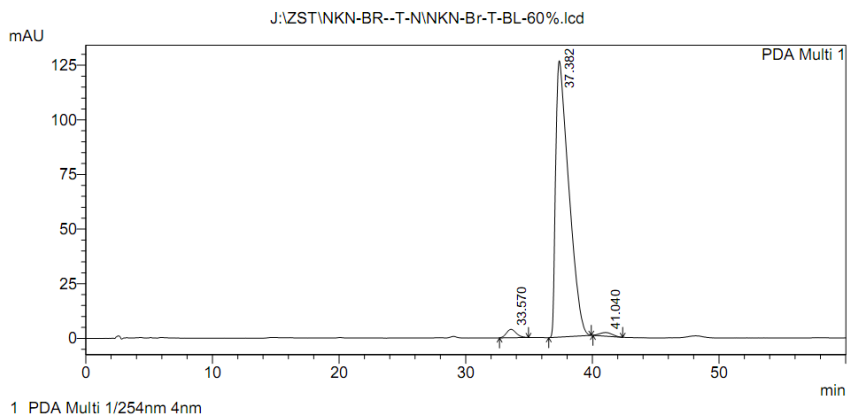

PeakTable

| Peak# | Ret. Time | Area    | Height | Area %  | Height % |
|-------|-----------|---------|--------|---------|----------|
| 1     | 33.570    | 210262  | 3866   | 2.223   | 2.927    |
| 2     | 37.382    | 9134583 | 126532 | 96.559  | 95.803   |
| 3     | 41.040    | 115225  | 1678   | 1.218   | 1.270    |
| Total |           | 9460071 | 132076 | 100.000 | 100.000  |

Figure S16-4. HPLC of compound 6a-5

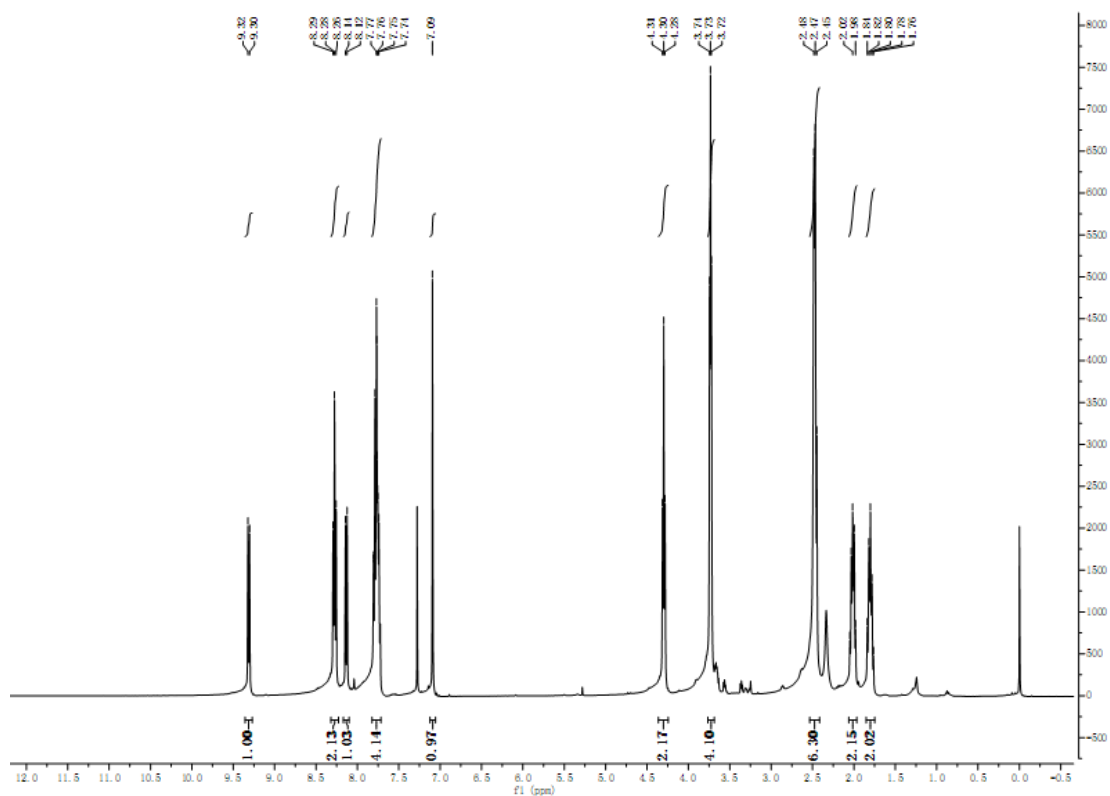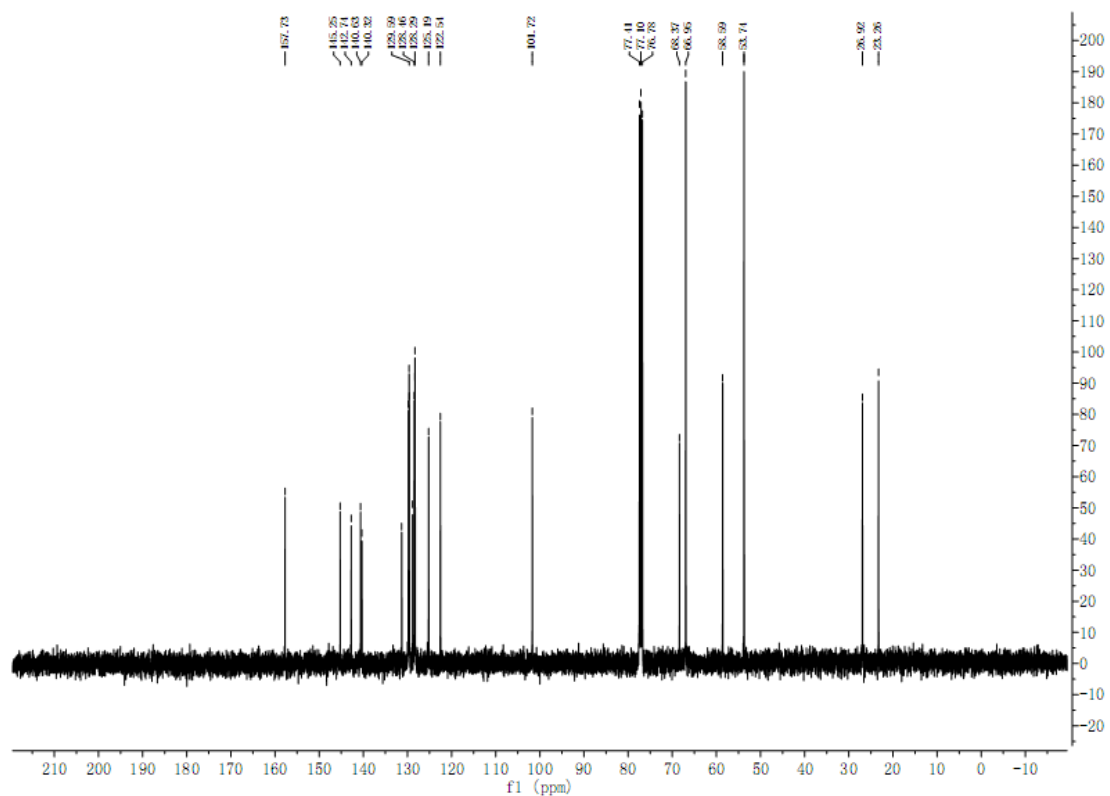

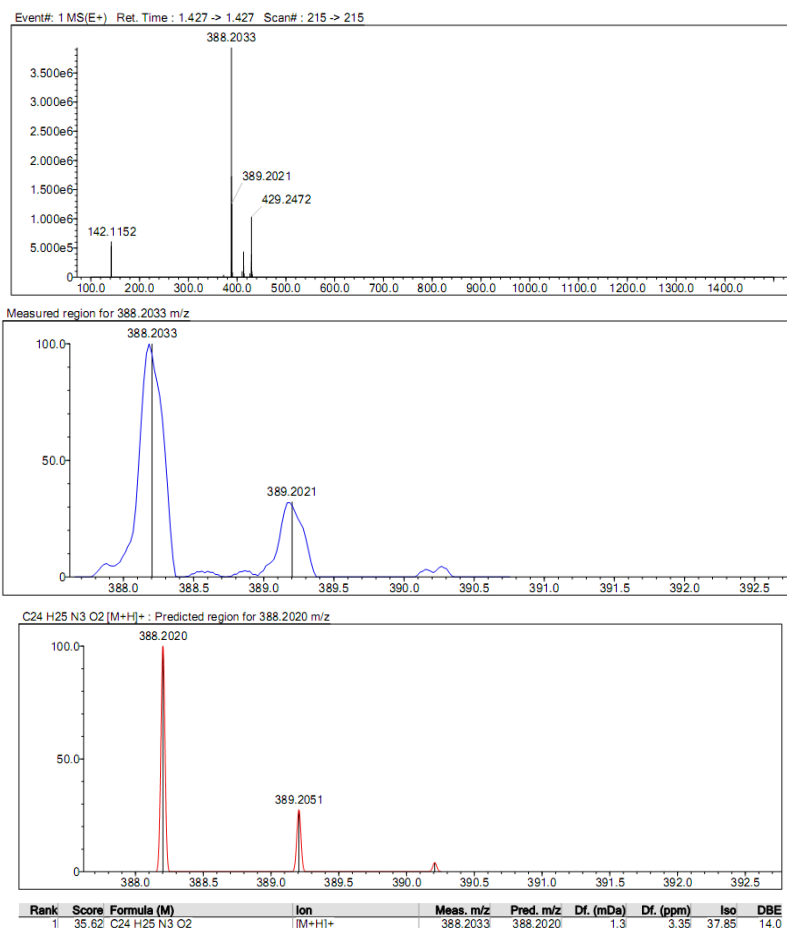

Figure S17-3. HRMS of compound **6a-6**

<Chromatogram>

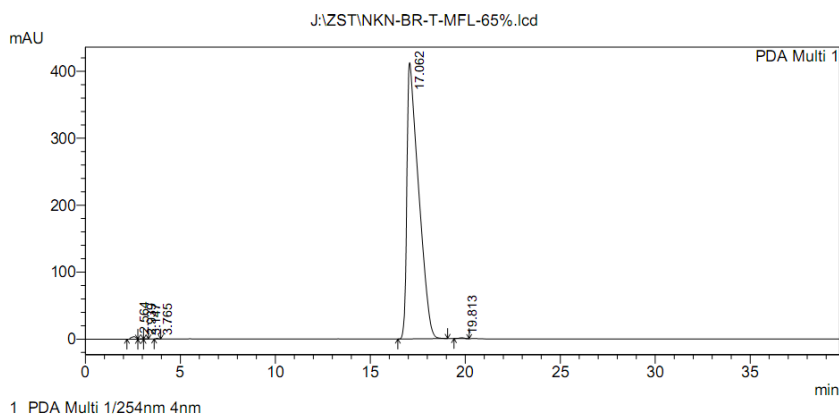

PeakTable

PDA Ch1 254nm 4nm

| Peak# | Ret. Time | Area     | Height | Area %  | Height % |
|-------|-----------|----------|--------|---------|----------|
| 1     | 2.564     | 63952    | 3908   | 0.360   | 0.931    |
| 2     | 2.939     | 7552     | 540    | 0.042   | 0.129    |
| 3     | 3.147     | 4326     | 398    | 0.024   | 0.095    |
| 4     | 3.765     | 8555     | 1016   | 0.048   | 0.242    |
| 5     | 17.062    | 17677247 | 412763 | 99.403  | 98.363   |
| 6     | 19.813    | 21768    | 1008   | 0.122   | 0.240    |
| Total |           | 17783400 | 419634 | 100.000 | 100.000  |

Figure S17-4. HPLC of compound **6a-6**

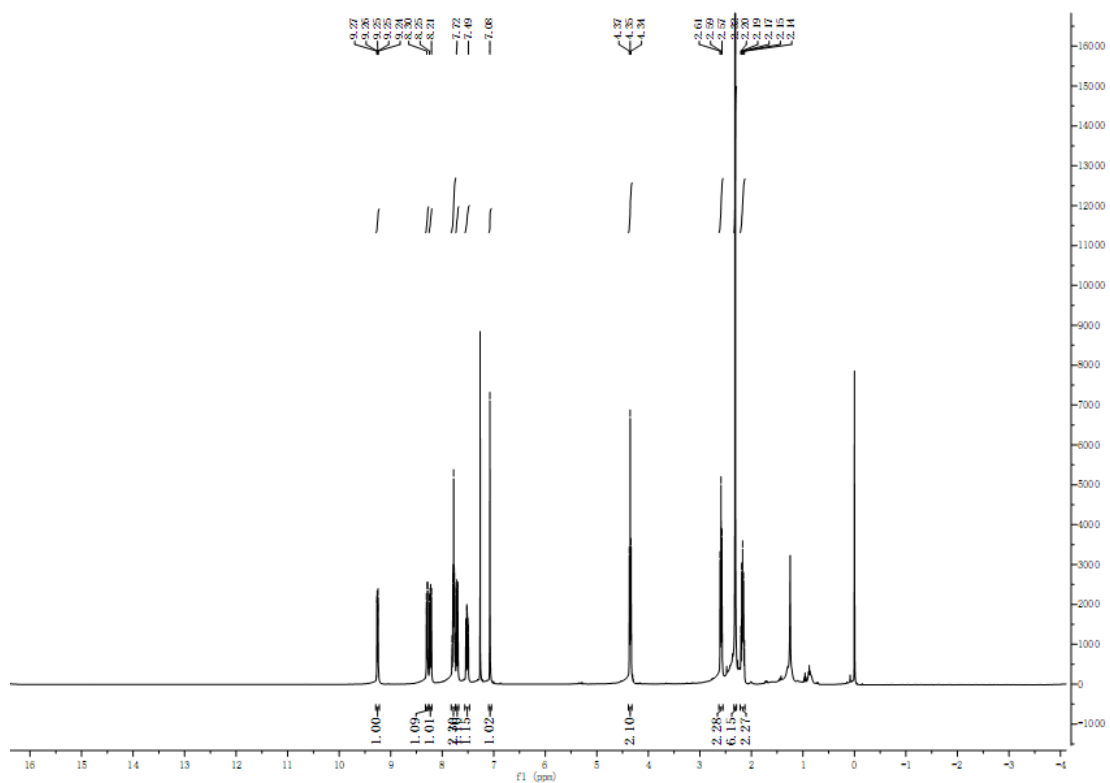

Figure S18-1.  $^1\text{H}$  NMR spectra of compound **5b-1** (400 MHz,  $\text{CDCl}_3$ )

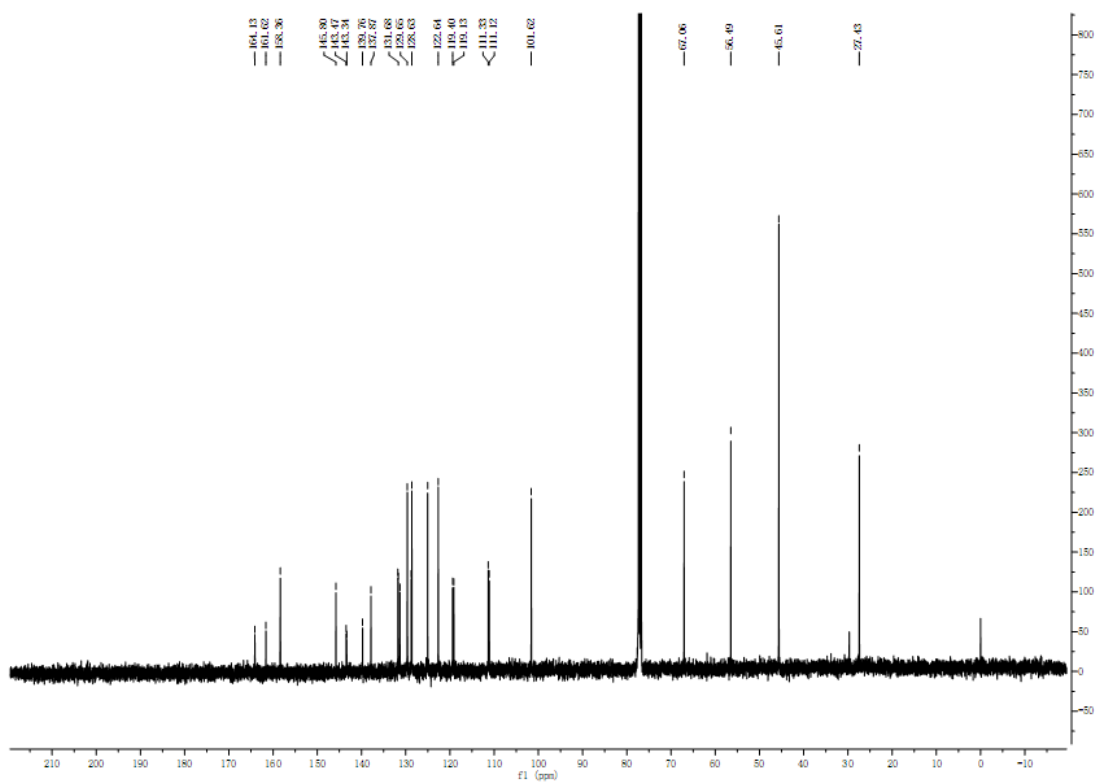

Figure S18-2.  $^{13}\text{C}$  NMR spectra of compound **5b-1** (101 MHz,  $\text{CDCl}_3$ )

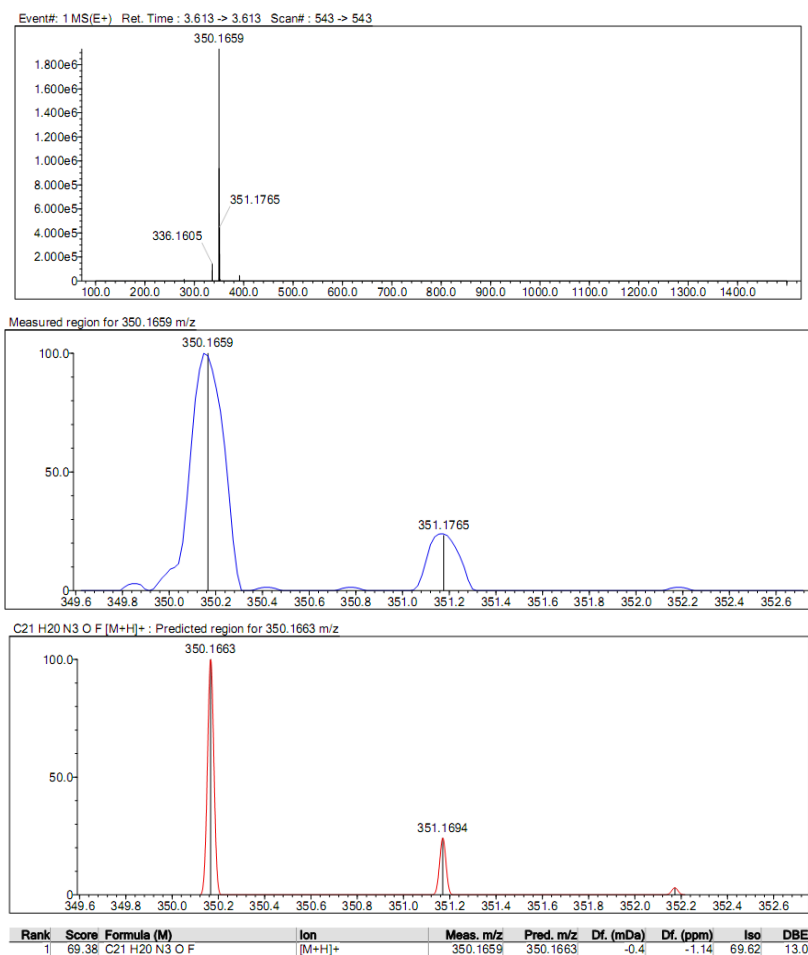

Figure S18-3. HRMS of compound **5b-1**

<Chromatogram>

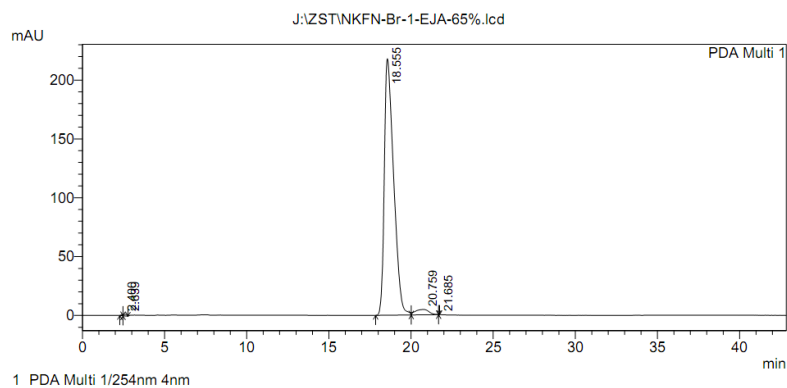

PeakTable

PDA Ch1 254nm 4nm

| Peak# | Ret. Time | Area    | Height | Area %  | Height % |
|-------|-----------|---------|--------|---------|----------|
| 1     | 2.400     | 7612    | 937    | 0.086   | 0.416    |
| 2     | 2.639     | 19328   | 1492   | 0.218   | 0.662    |
| 3     | 18.555    | 8579698 | 218065 | 96.695  | 96.843   |
| 4     | 20.759    | 266126  | 4608   | 2.999   | 2.046    |
| 5     | 21.685    | 168     | 73     | 0.002   | 0.032    |
| Total |           | 8872931 | 225174 | 100.000 | 100.000  |

Figure S18-4. HPLC of compound **5b-1**

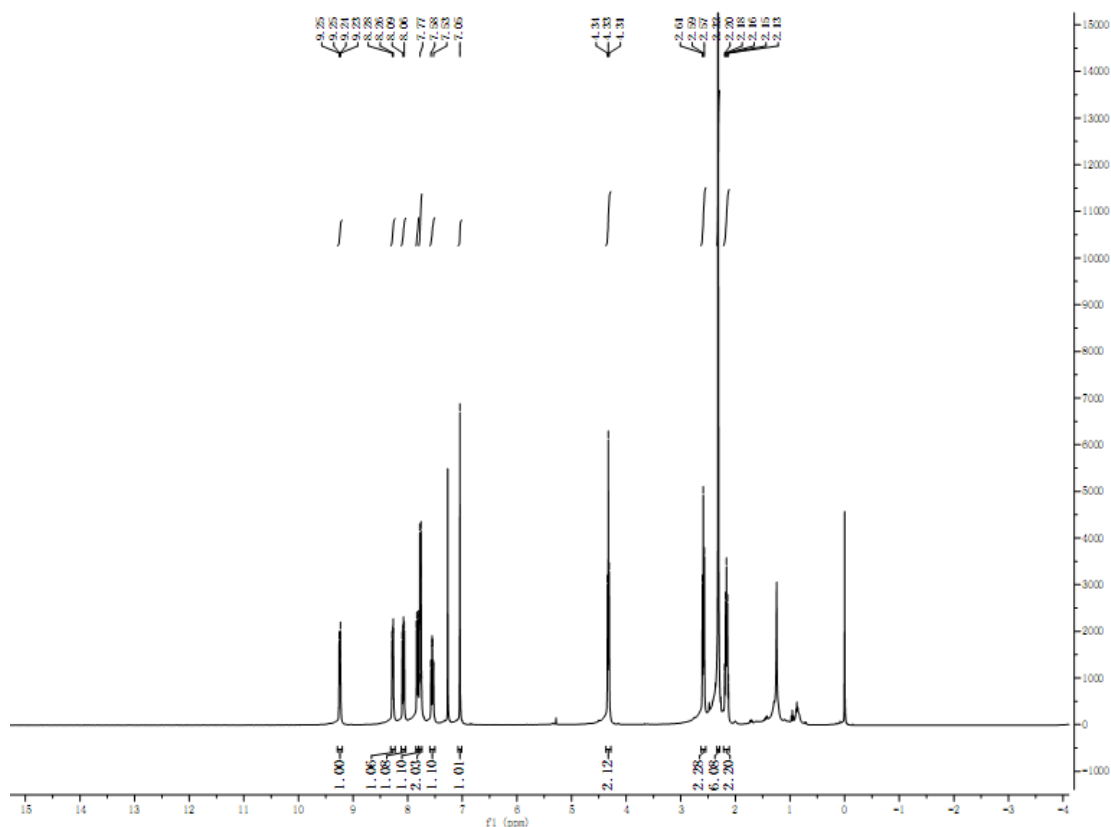

Figure S19-1. <sup>1</sup>H NMR spectra of compound **5b-2** (400 MHz, CDCl<sub>3</sub>)

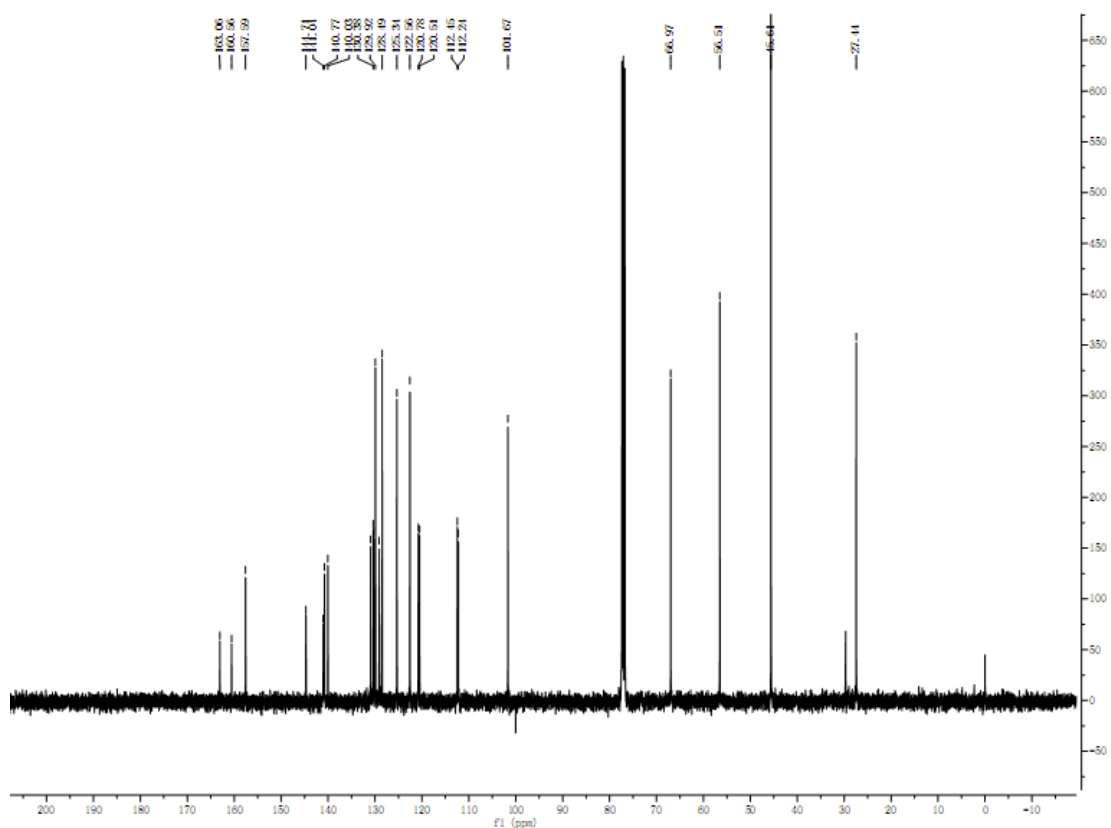

Figure S19-2. <sup>13</sup>C NMR spectra of compound **5b-2** (101 MHz, CDCl<sub>3</sub>)

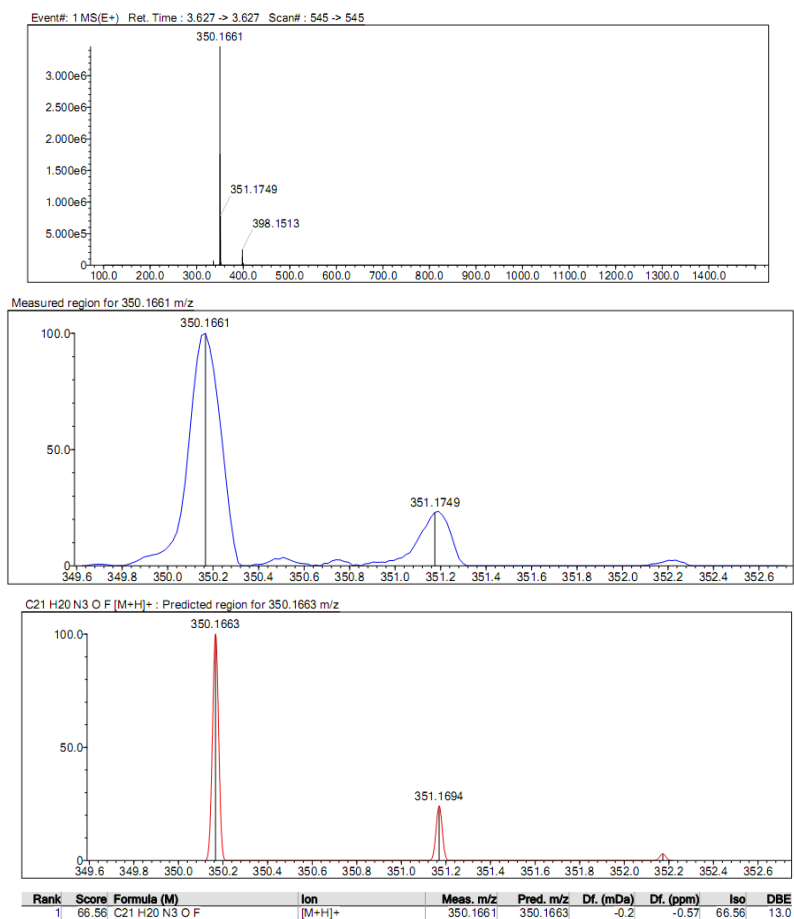

Figure S19-3. HRMS of compound **5b-2**

<Chromatogram>

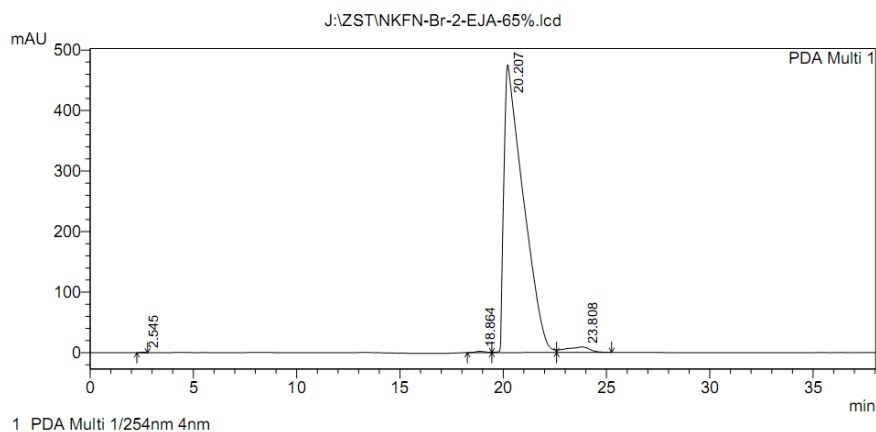

PeakTable

| Peak# | Ret. Time | Area     | Height | Area %  | Height % |
|-------|-----------|----------|--------|---------|----------|
| 1     | 2.545     | 26179    | 1282   | 0.082   | 0.263    |
| 2     | 18.864    | 70660    | 2031   | 0.222   | 0.416    |
| 3     | 20.207    | 31024472 | 475688 | 97.454  | 97.499   |
| 4     | 23.808    | 713644   | 8890   | 2.242   | 1.822    |
| Total |           | 31834955 | 487891 | 100.000 | 100.000  |

Figure S19-4. HPLC of compound **5b-2**



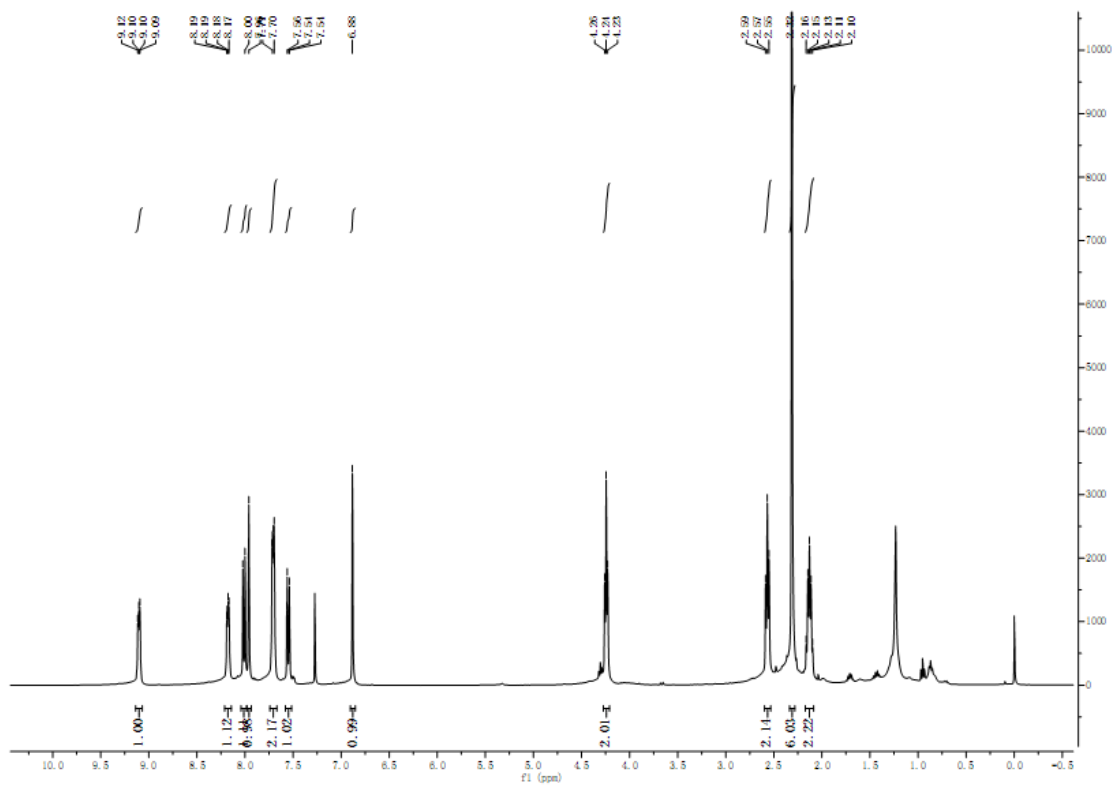

Figure S20-1.  $^1\text{H}$  NMR spectra of compound **5c-1** (400 MHz,  $\text{CDCl}_3$ )

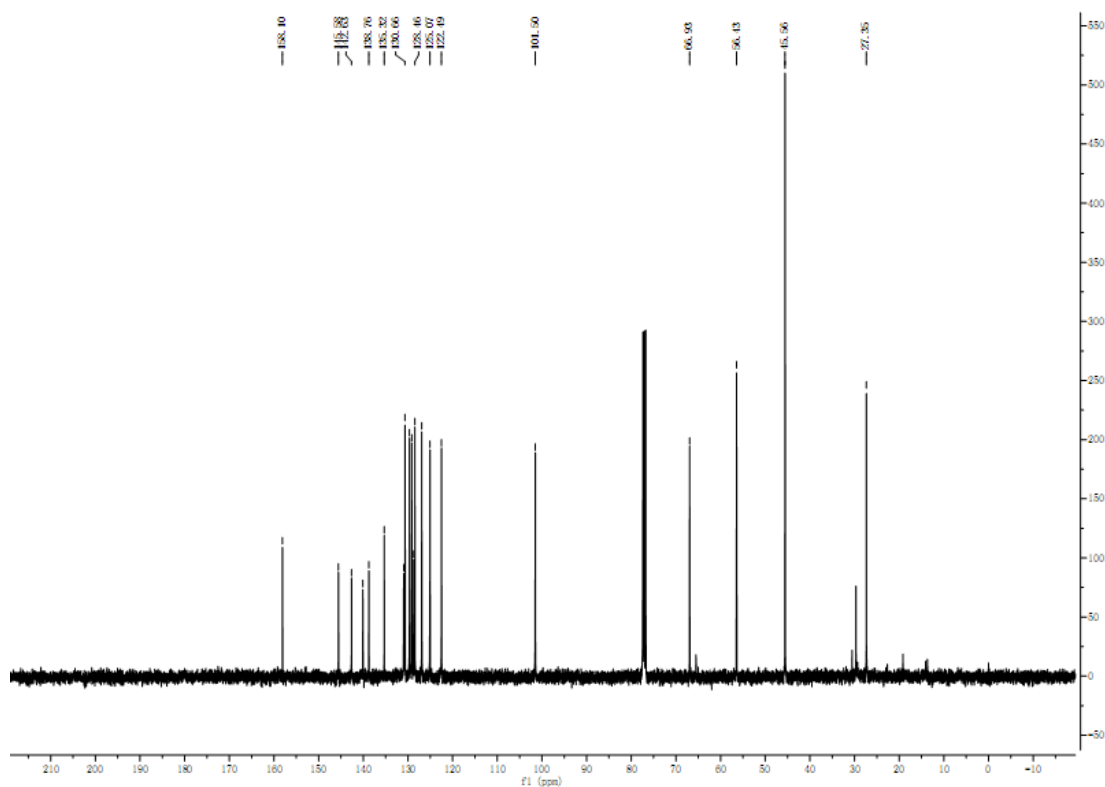

Figure S20-2.  $^{13}\text{C}$  NMR spectra of compound **5c-1** (101 MHz,  $\text{CDCl}_3$ )

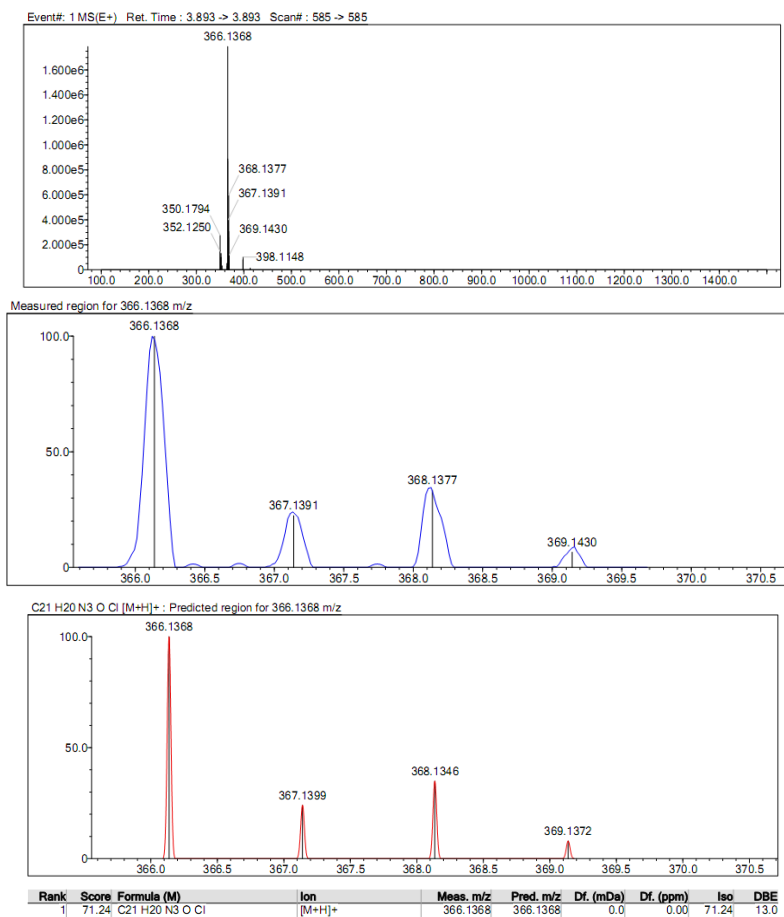

Figure S20-3. HRMS of compound **5c-1**

<Chromatogram>

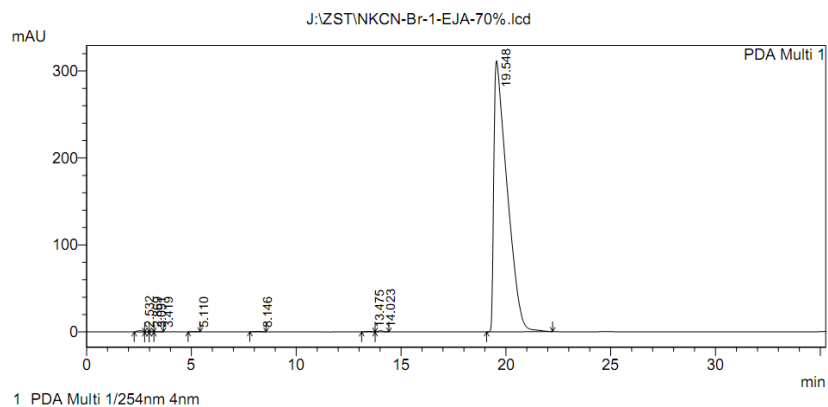

PeakTable

| Peak# | Ret. Time | Area     | Height | Area %  | Height % |
|-------|-----------|----------|--------|---------|----------|
| 1     | 2.532     | 28647    | 1529   | 0.207   | 0.481    |
| 2     | 2.869     | 5746     | 550    | 0.042   | 0.173    |
| 3     | 3.091     | 9089     | 888    | 0.066   | 0.279    |
| 4     | 3.419     | 8662     | 464    | 0.063   | 0.146    |
| 5     | 5.110     | 7534     | 382    | 0.054   | 0.120    |
| 6     | 8.146     | 11580    | 452    | 0.084   | 0.142    |
| 7     | 13.475    | 14805    | 709    | 0.107   | 0.223    |
| 8     | 14.023    | 23948    | 1342   | 0.173   | 0.422    |
| 9     | 19.548    | 13723497 | 311861 | 99.205  | 98.014   |
| Total |           | 13833507 | 318179 | 100.000 | 100.000  |

Figure S20-4. HPLC of compound **5c-1**

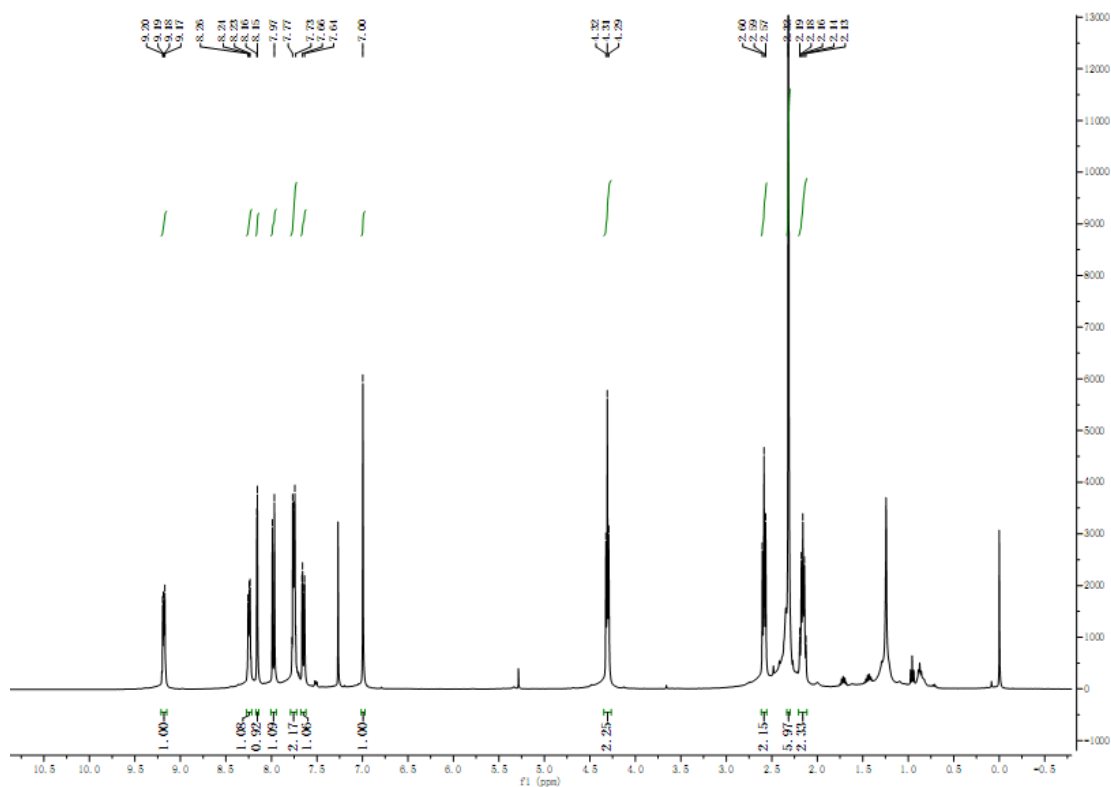

Figure S21-1.  $^1\text{H}$  NMR spectra of compound **5c-2** (400 MHz,  $\text{CDCl}_3$ )

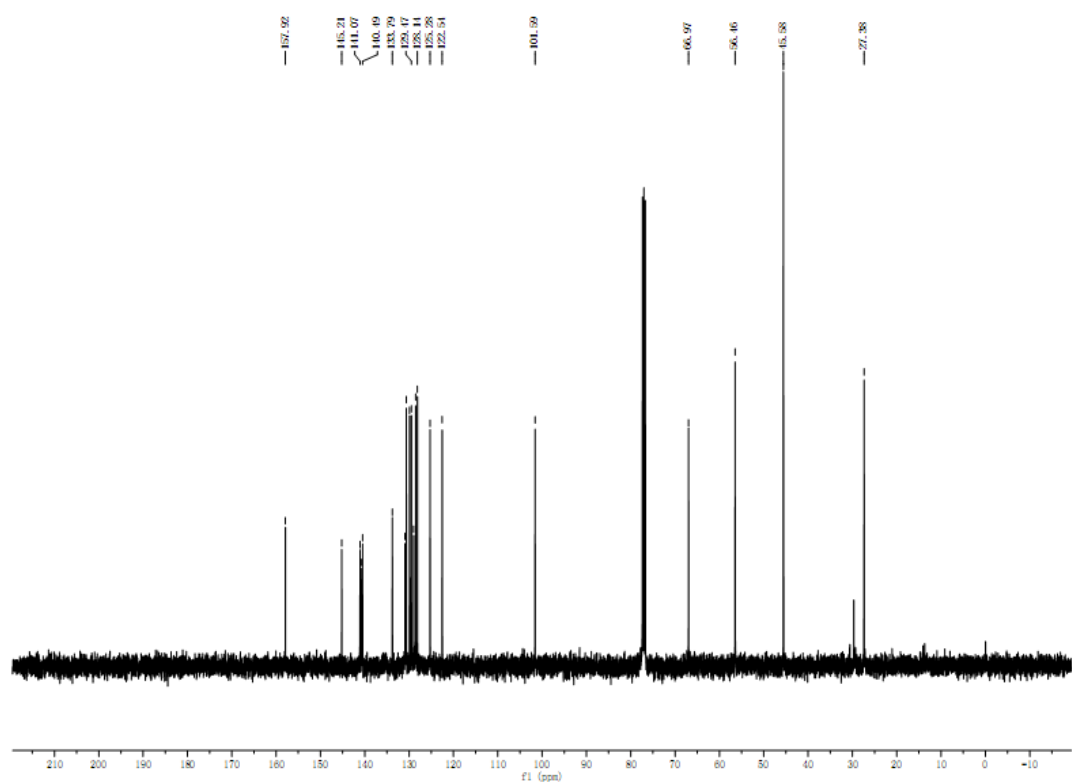

Figure S21-2.  $^{13}\text{C}$  NMR spectra of compound **5c-2** (101 MHz,  $\text{CDCl}_3$ )

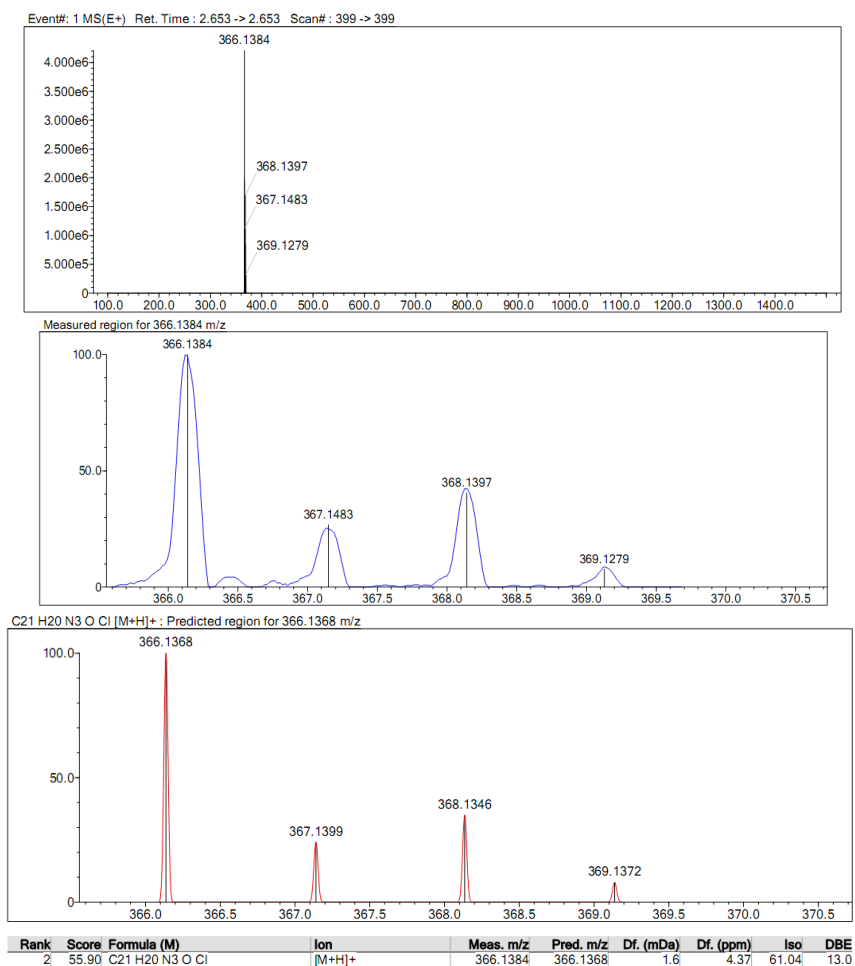

Figure S21-3. HRMS of compound **5c-2**

<Chromatogram>

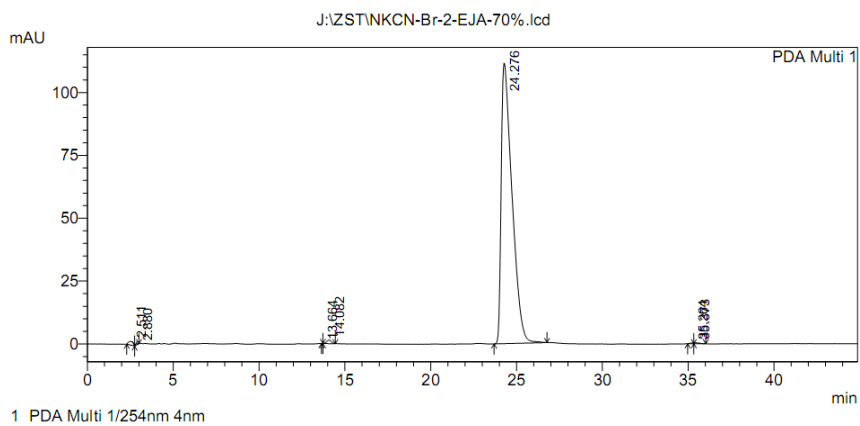

PeakTable

PDA Ch1 254nm 4nm

| Peak# | Ret. Time | Area    | Height | Area %  | Height % |
|-------|-----------|---------|--------|---------|----------|
| 1     | 2.511     | 28566   | 1456   | 0.578   | 1.259    |
| 2     | 2.880     | 4198    | 423    | 0.085   | 0.366    |
| 3     | 13.664    | 200     | 34     | 0.004   | 0.029    |
| 4     | 14.082    | 27694   | 1435   | 0.560   | 1.242    |
| 5     | 24.276    | 4872490 | 111550 | 98.523  | 96.510   |
| 6     | 35.264    | 3957    | 313    | 0.080   | 0.271    |
| 7     | 35.373    | 8417    | 373    | 0.170   | 0.322    |
| Total |           | 4945521 | 115584 | 100.000 | 100.000  |

Figure S21-4. HPLC of compound **5c-2**

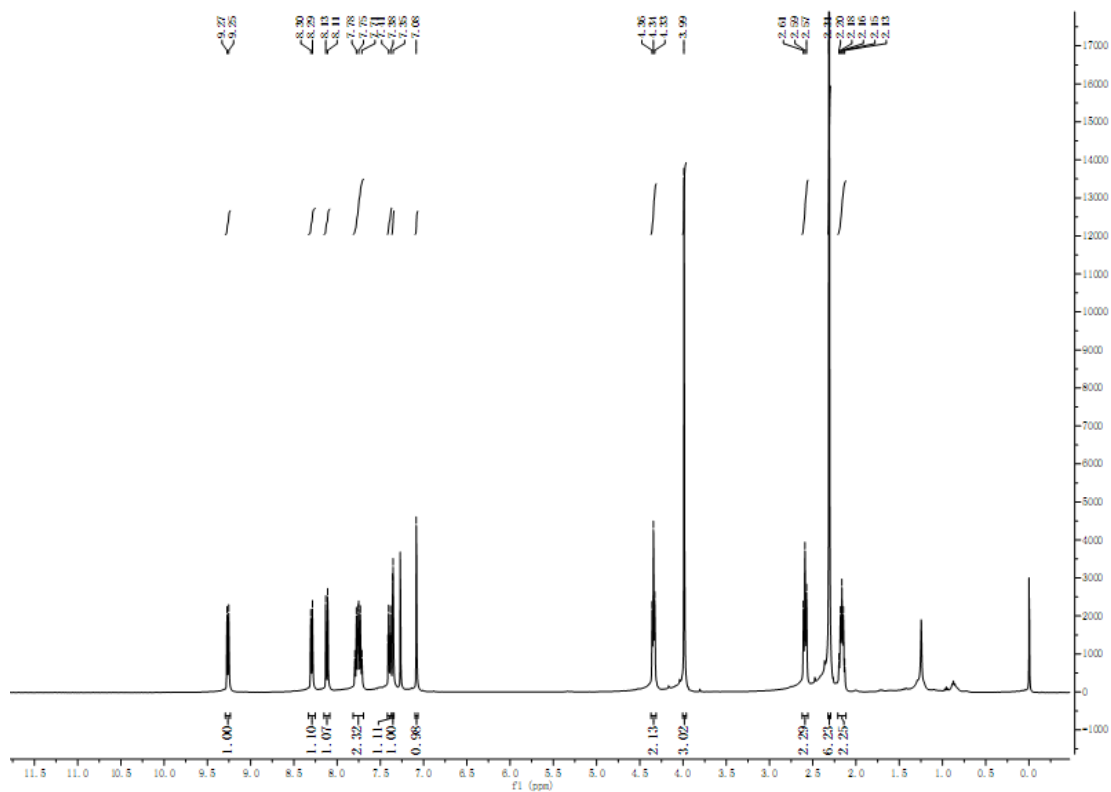

Figure S22-1.  $^1\text{H}$  NMR spectra of compound **5d-1** (400 MHz,  $\text{CDCl}_3$ )

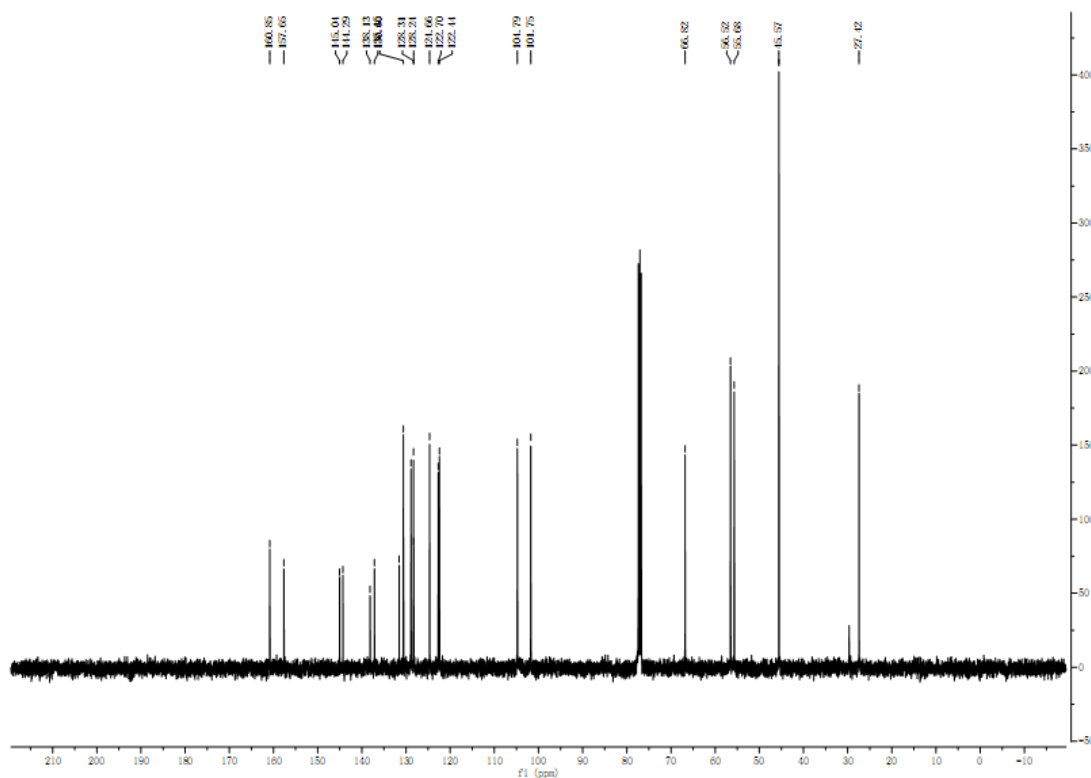

Figure S22-2.  $^{13}\text{C}$  NMR spectra of compound **5d-1** (101 MHz,  $\text{CDCl}_3$ )

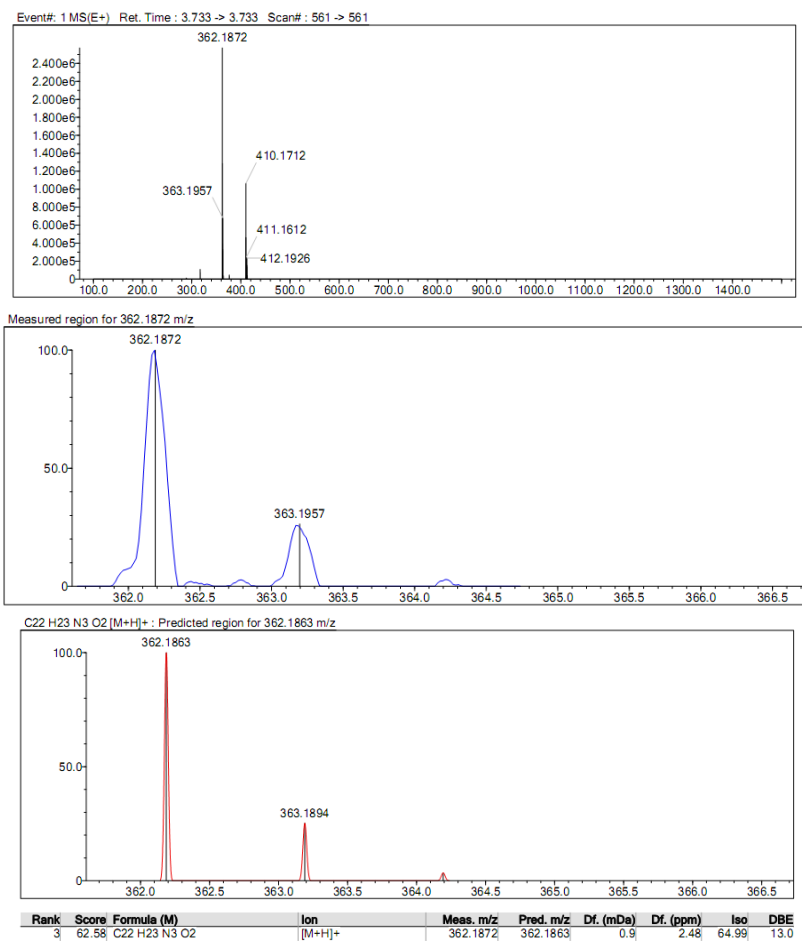

Figure S22-3. HRMS of compound **5d-1**

<Chromatogram>

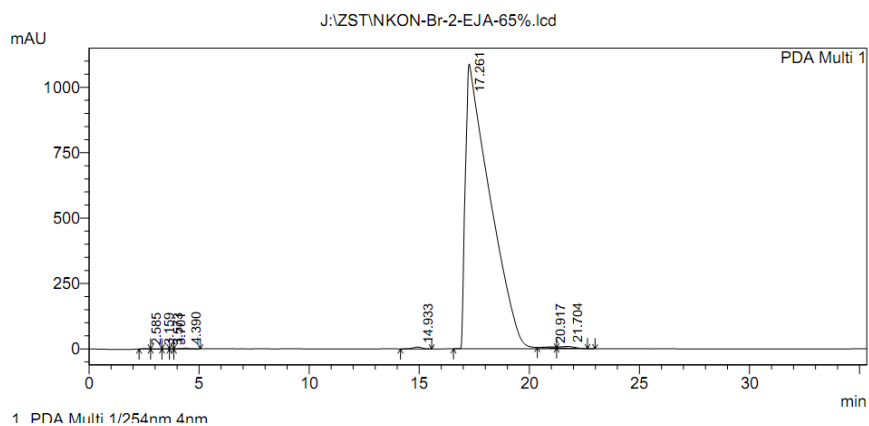

PeakTable

PDA Ch1 254nm 4nm

| Peak# | Ret. Time | Area     | Height  | Area %  | Height % |
|-------|-----------|----------|---------|---------|----------|
| 1     | 2.585     | 25146    | 1452    | 0.030   | 0.131    |
| 2     | 3.159     | 16708    | 767     | 0.020   | 0.069    |
| 3     | 3.573     | 13418    | 742     | 0.016   | 0.067    |
| 4     | 3.701     | 9677     | 818     | 0.011   | 0.074    |
| 5     | 4.390     | 100776   | 3838    | 0.118   | 0.345    |
| 6     | 14.933    | 210523   | 7074    | 0.247   | 0.636    |
| 7     | 17.261    | 84410195 | 1088383 | 99.100  | 97.876   |
| 8     | 20.917    | 100282   | 2637    | 0.118   | 0.237    |
| 9     | 21.704    | 289715   | 6288    | 0.340   | 0.565    |
| Total |           | 85176440 | 1111999 | 100.000 | 100.000  |

Figure S22-4. HPLC of compound **5d-1**

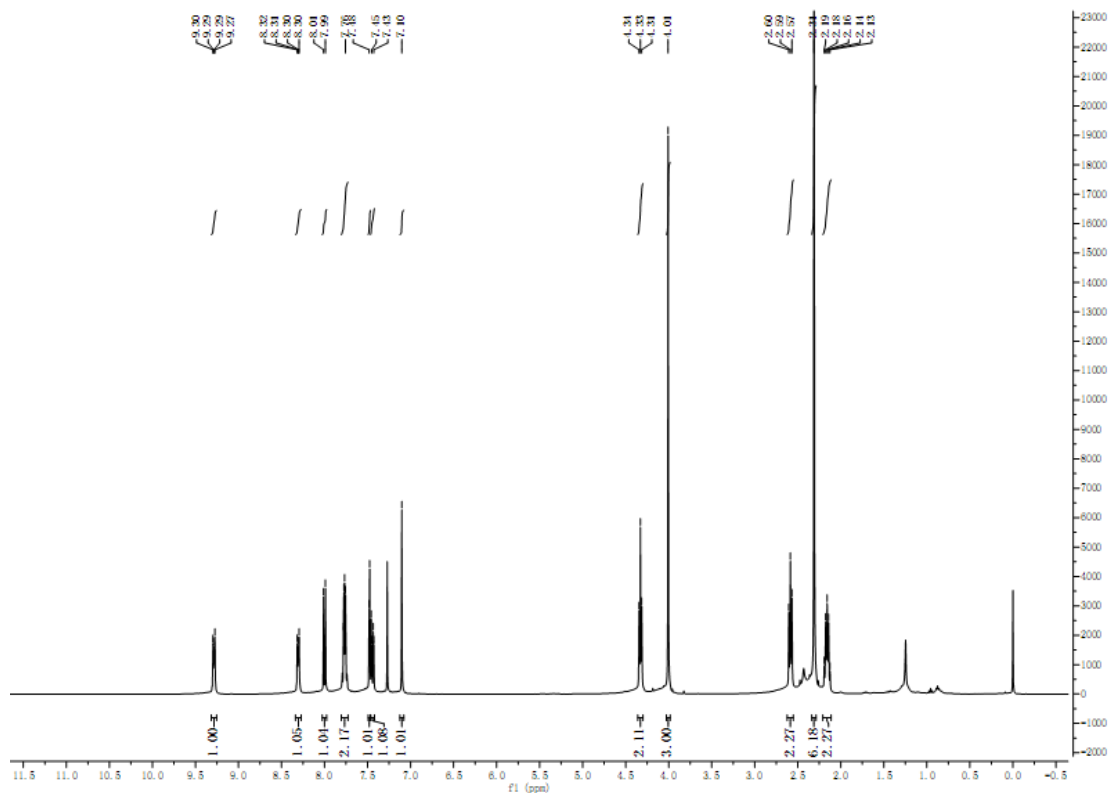

Figure S23-1.  $^1\text{H}$  NMR spectra of compound **5d-2** (400 MHz,  $\text{CDCl}_3$ )

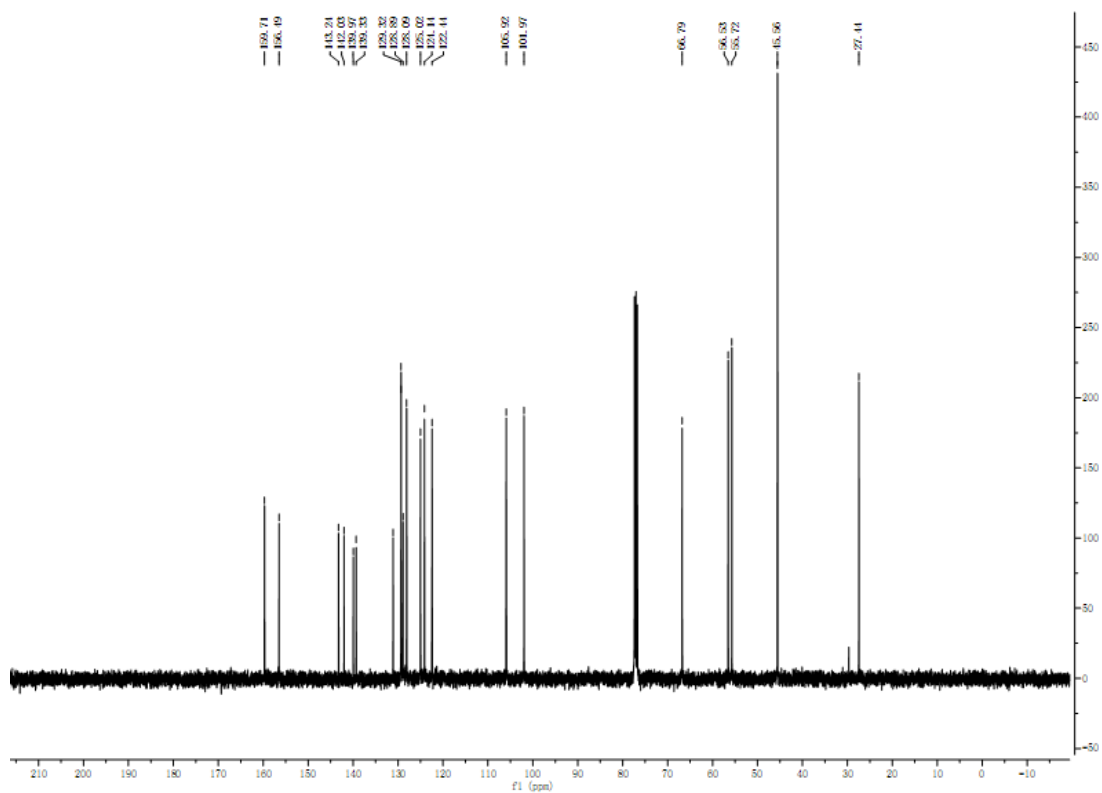

Figure S23-2.  $^{13}\text{C}$  NMR spectra of compound **5d-2** (101 MHz,  $\text{CDCl}_3$ )

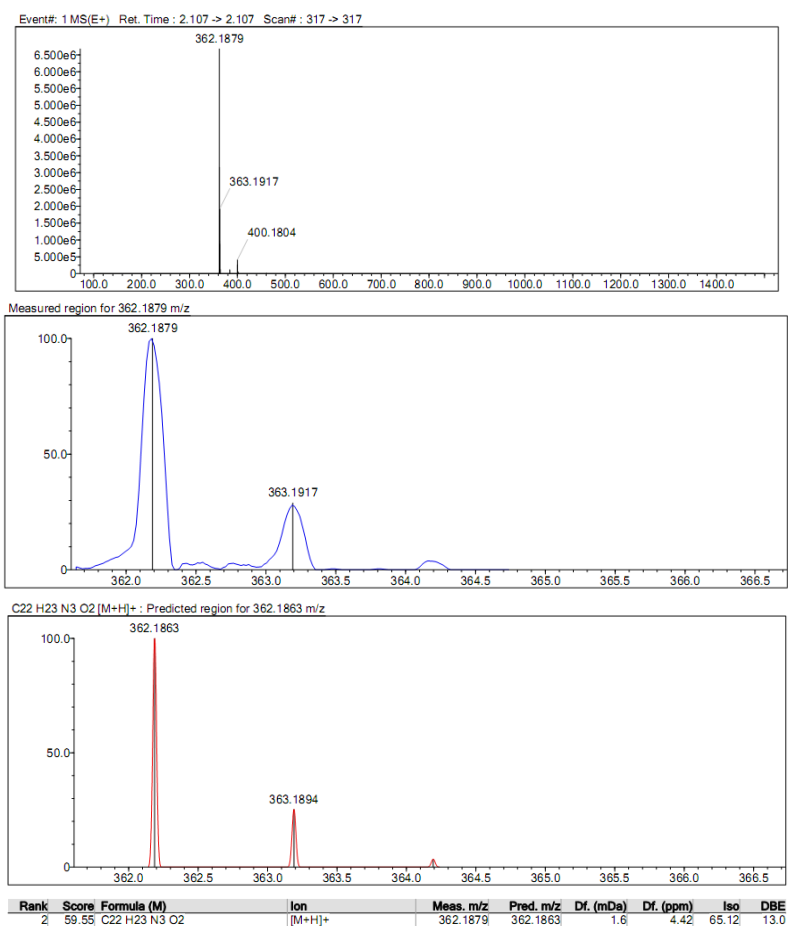

Figure S23-3. HRMS of compound **5d-2**

<Chromatogram>

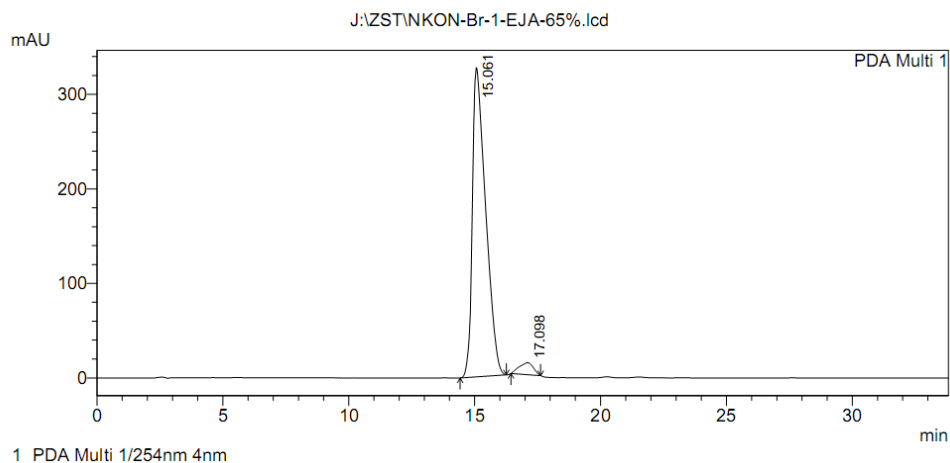

PeakTable

PDA Ch1 254nm 4nm

| Peak# | Ret. Time | Area     | Height | Area %  | Height % |
|-------|-----------|----------|--------|---------|----------|
| 1     | 15.061    | 11979096 | 327071 | 96.016  | 96.260   |
| 2     | 17.098    | 497104   | 12708  | 3.984   | 3.740    |
| Total |           | 12476200 | 339780 | 100.000 | 100.000  |

Figure S23-4. HPLC of compound **5d-2**



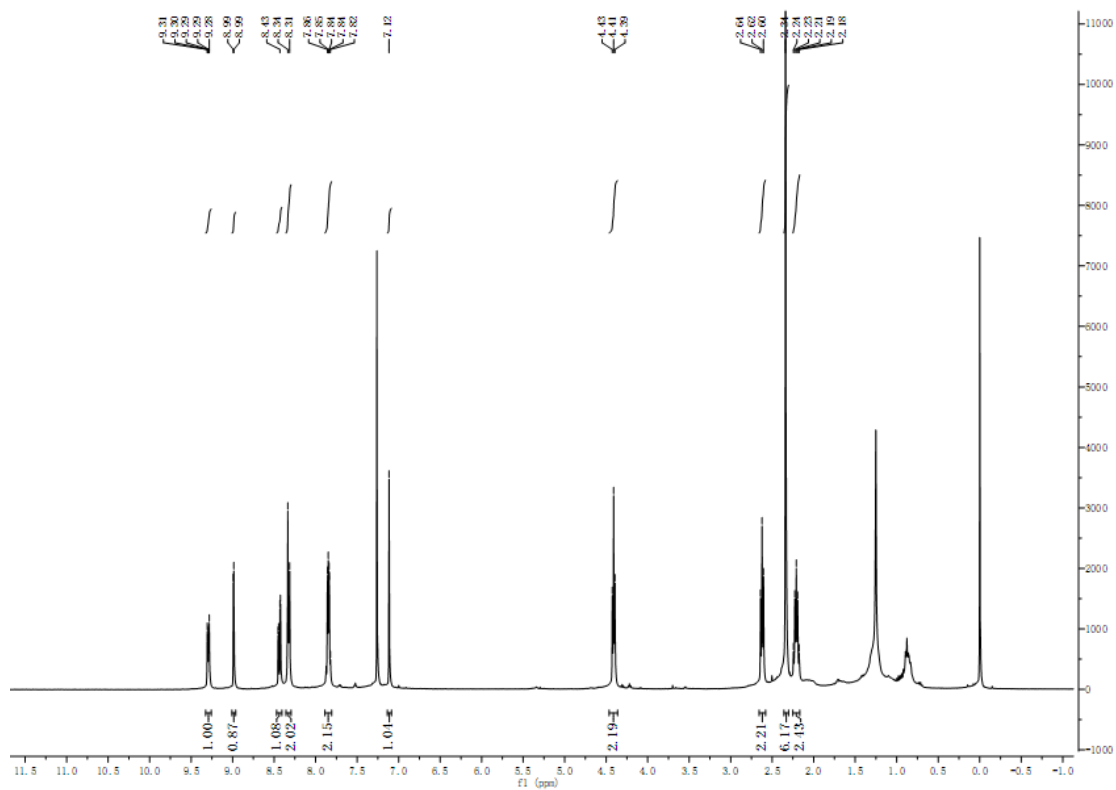

Figure S24-1.  $^1\text{H}$  NMR spectra of compound **5e-1** (400 MHz,  $\text{CDCl}_3$ )

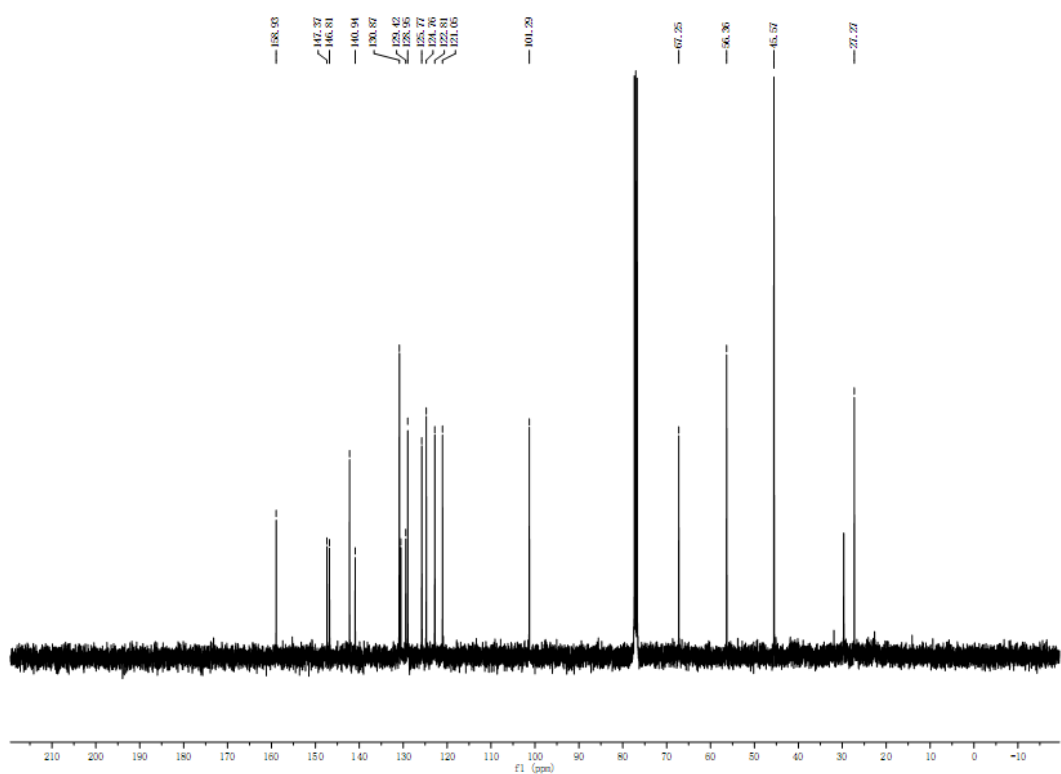

Figure S24-2.  $^{13}\text{C}$  NMR spectra of compound **5e-1** (101 MHz,  $\text{CDCl}_3$ )

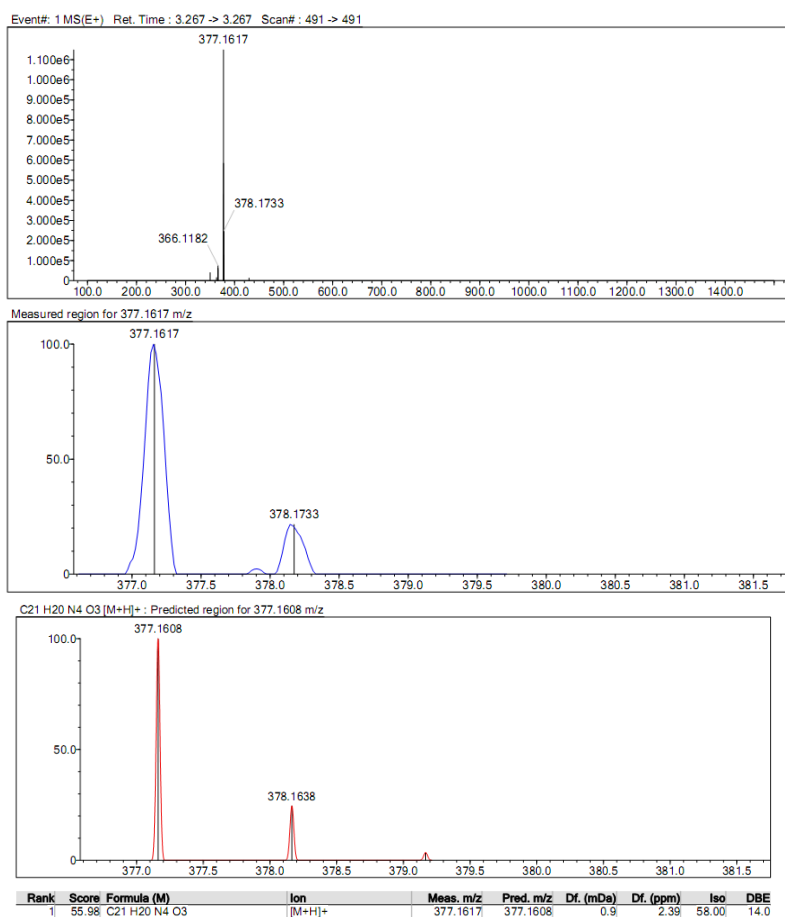

Figure S24-3. HRMS of compound **5e-1**

<Chromatogram>

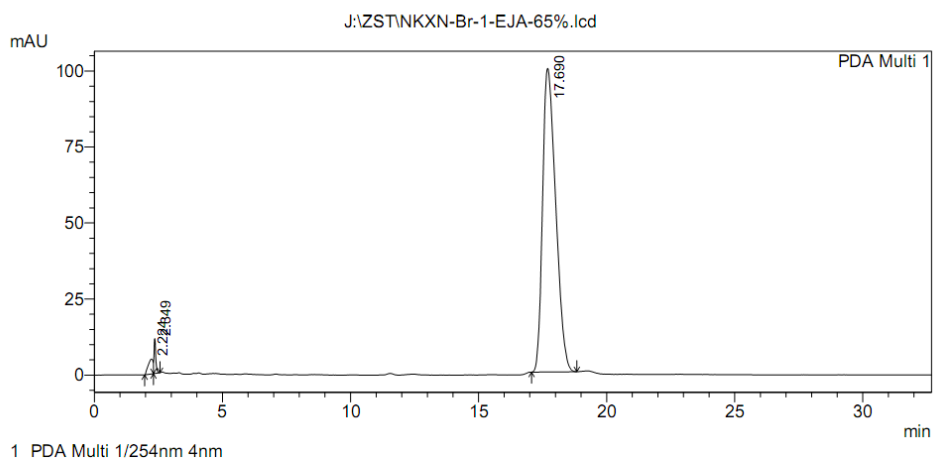

PeakTable

| Peak# | Ret. Time | Area    | Height | Area %  | Height % |
|-------|-----------|---------|--------|---------|----------|
| 1     | 2.224     | 65446   | 4881   | 1.780   | 4.198    |
| 2     | 2.349     | 53642   | 11509  | 1.459   | 9.897    |
| 3     | 17.690    | 3557666 | 99897  | 96.761  | 85.906   |
| Total |           | 3676754 | 116287 | 100.000 | 100.000  |

Figure S24-4. HPLC of compound **5e-1**

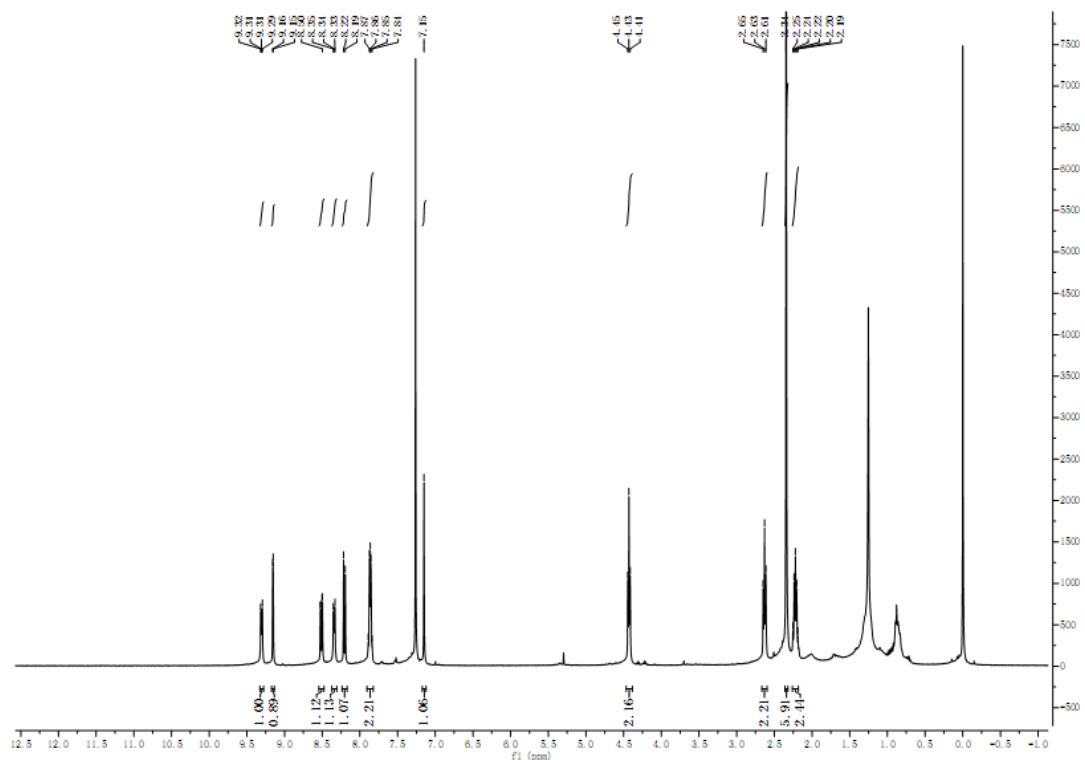

Figure S25-1. <sup>1</sup>H NMR spectra of compound **5e-2** (400 MHz, CDCl<sub>3</sub>)

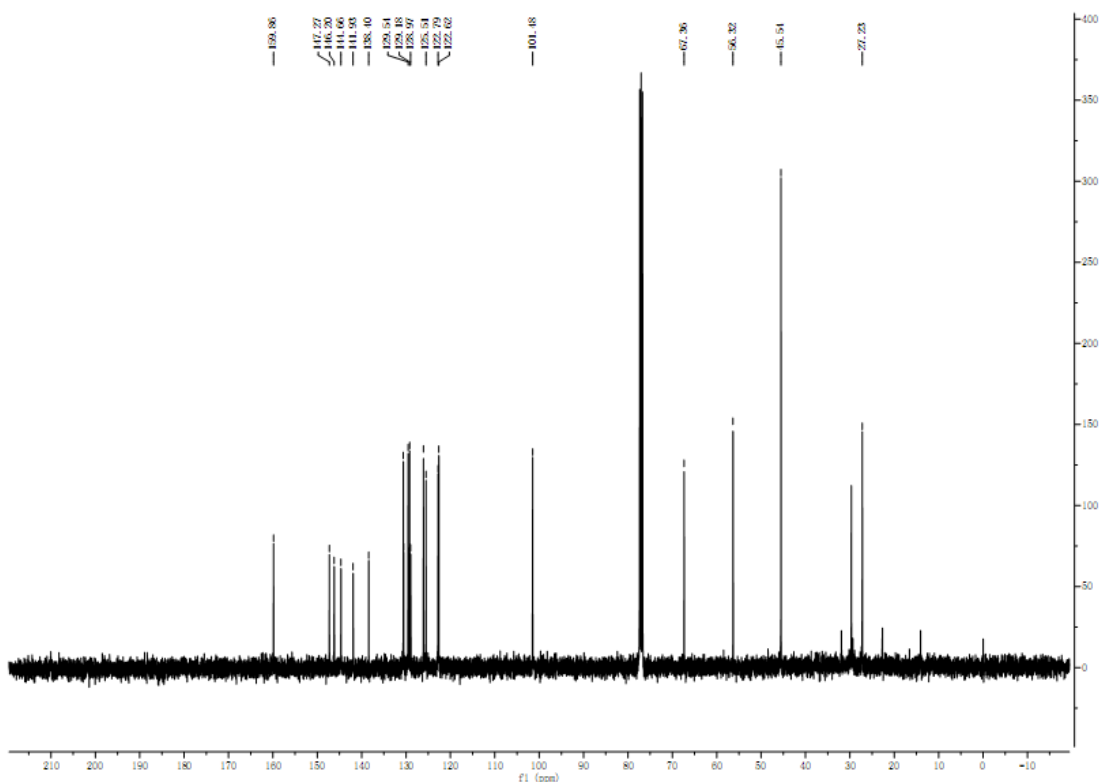

Figure S25-2. <sup>13</sup>C NMR spectra of compound **5e-2** (101 MHz, CDCl<sub>3</sub>)

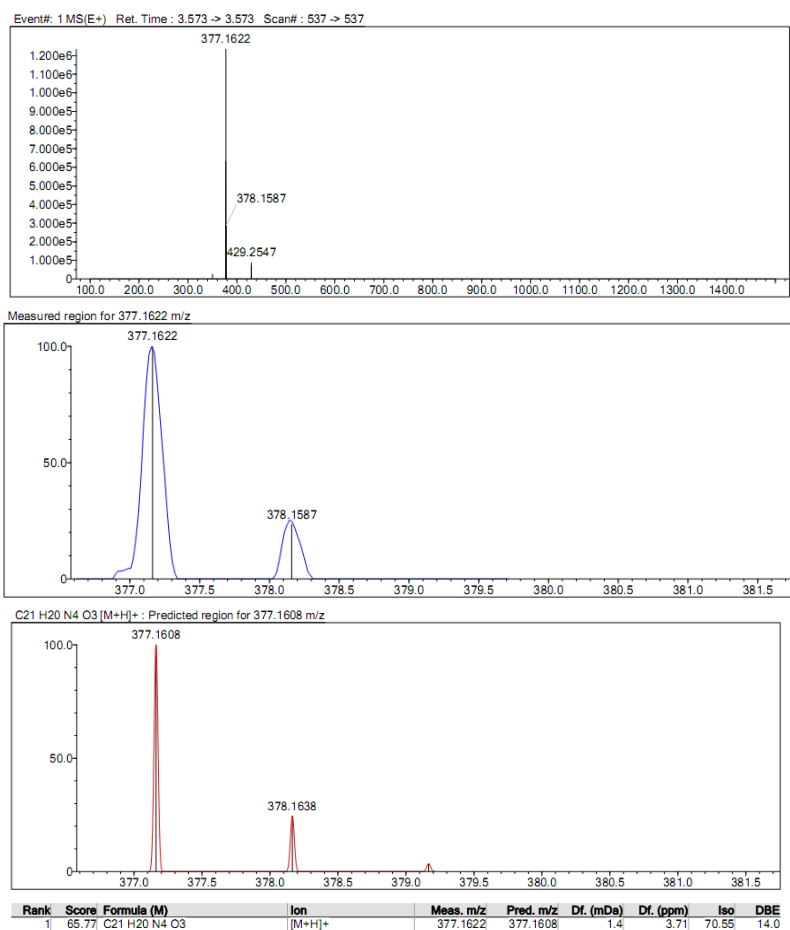

Figure S25-3. HRMS of compound 5e-2

<Chromatogram>

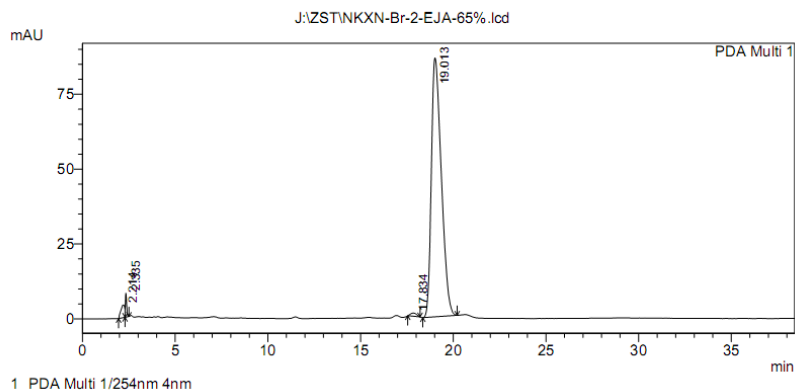

PeakTable

PDA Ch1 254nm 4nm

| Peak# | Ret. Time | Area    | Height | Area %  | Height % |
|-------|-----------|---------|--------|---------|----------|
| 1     | 2.214     | 60726   | 4243   | 1.816   | 4.253    |
| 2     | 2.335     | 36717   | 7990   | 1.098   | 8.009    |
| 3     | 17.834    | 24373   | 1053   | 0.729   | 1.055    |
| 4     | 19.013    | 3221474 | 86470  | 96.356  | 86.682   |
| Total |           | 3343291 | 99755  | 100.000 | 100.000  |

Figure S25-4. HPLC of compound 5e-2

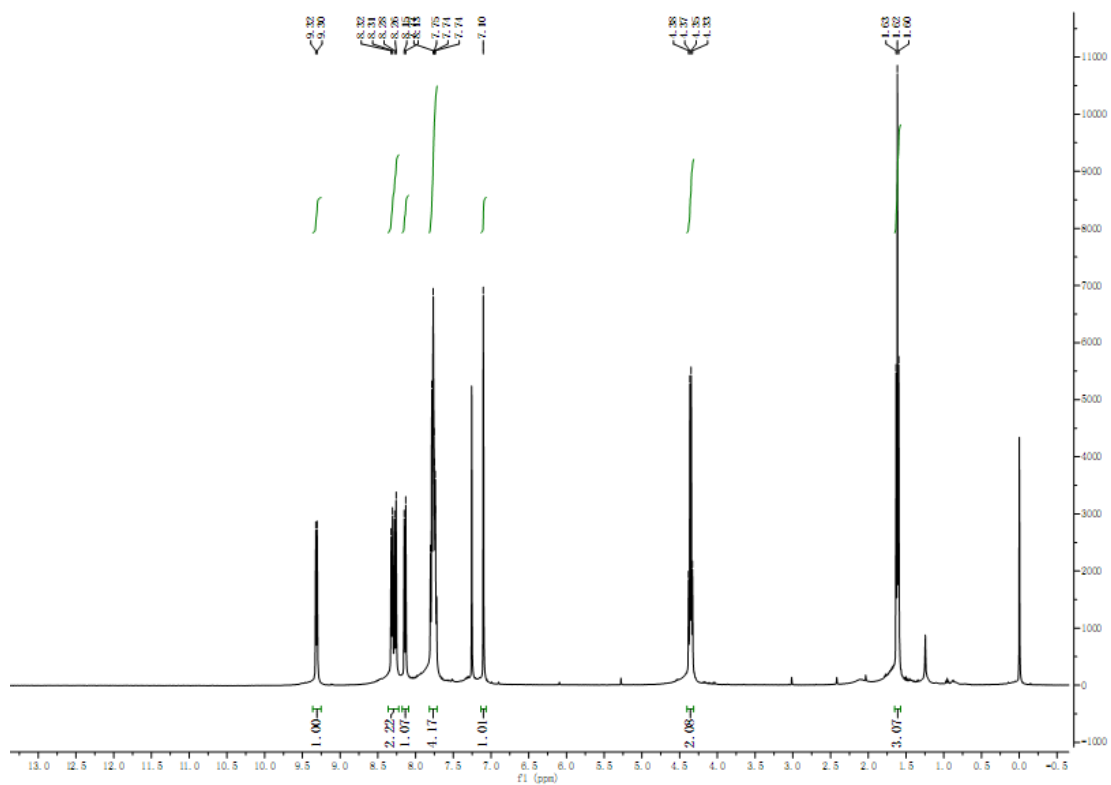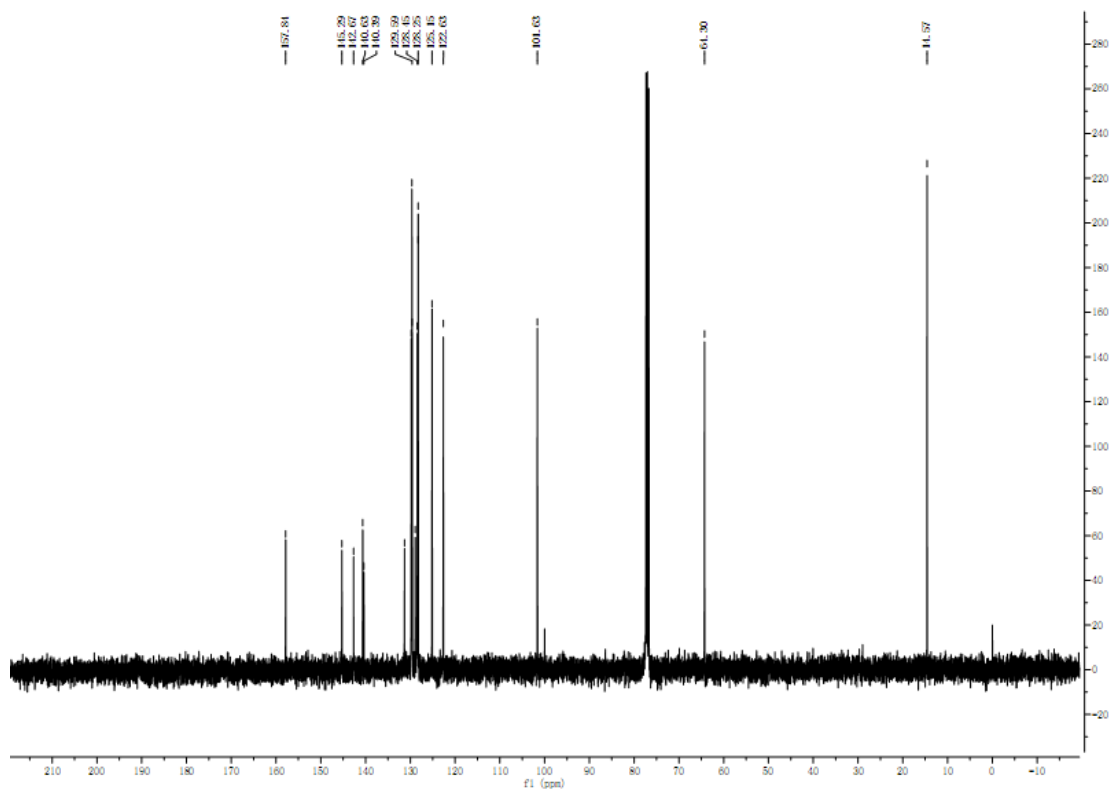

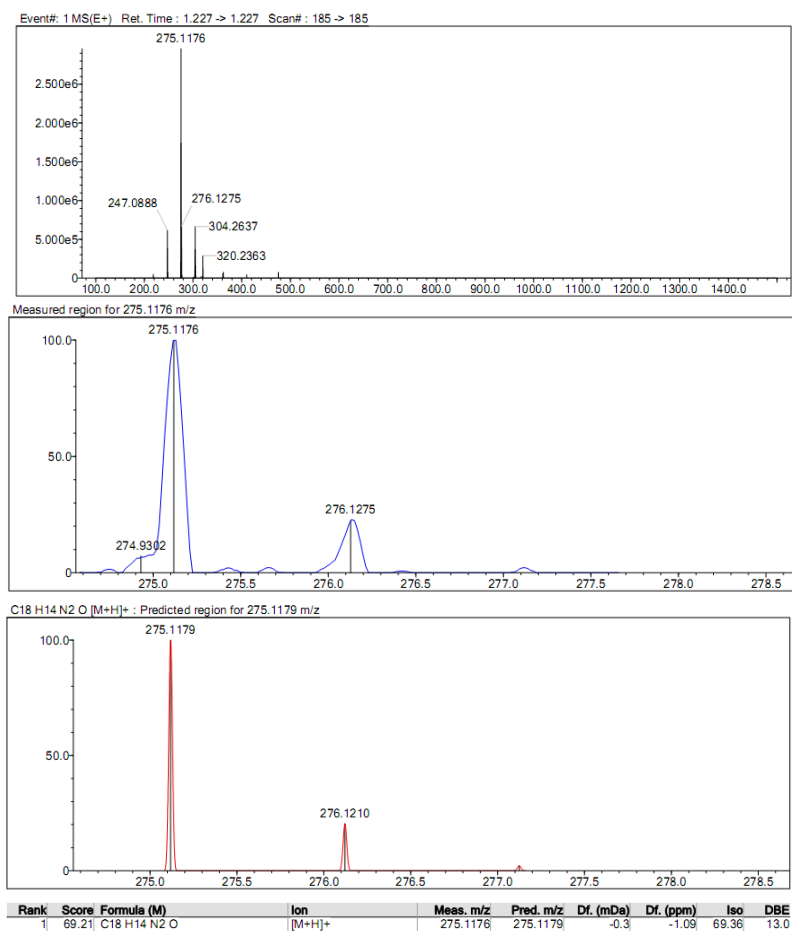

Figure S26-3. HRMS of compound 7

<Chromatogram>

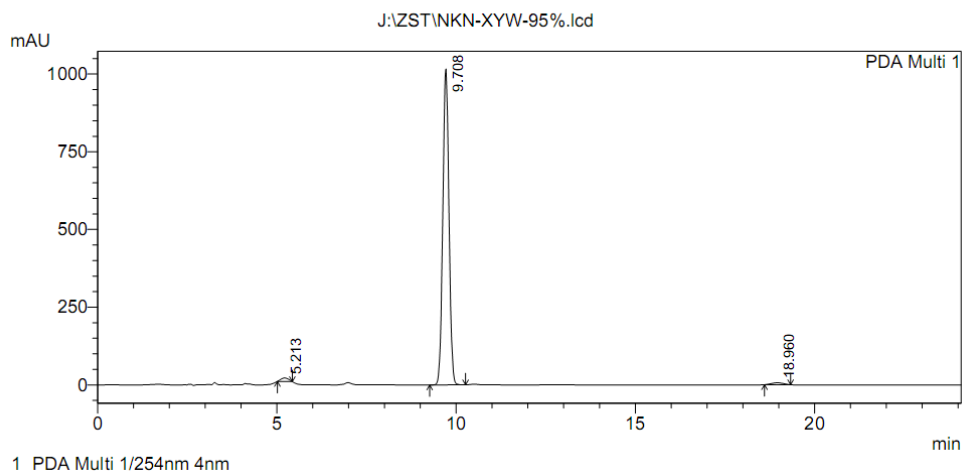

PeakTable

PDA Ch1 254nm 4nm

| Peak# | Ret. Time | Area     | Height  | Area %  | Height % |
|-------|-----------|----------|---------|---------|----------|
| 1     | 5.213     | 172298   | 11346   | 1.386   | 1.097    |
| 2     | 9.708     | 12112179 | 1016614 | 97.456  | 98.292   |
| 3     | 18.960    | 143845   | 6321    | 1.157   | 0.611    |
| Total |           | 12428322 | 1034281 | 100.000 | 100.000  |

Figure S26-4. HPLC of compound 7
